# 1 *Building the Mega Single Cell Transcriptome Ocular Meta-Atlas*

2 Vinay S Swamy<sup>1</sup>, Temesgen D Fufa<sup>2</sup>, Robert B Hufnagel<sup>2</sup>, and David M McGaughey<sup>1,□</sup>

3 July 27, 2021

## 4 **Abstract**

5 The development of highly scalable single cell transcriptome technology has resulted in the creation of thousands of  
6 datasets, over 30 in the retina alone. Analyzing the transcriptomes between different projects is highly desirable as  
7 this would allow for better assessment of which biological effects are consistent across independent studies.  
8 However it is difficult to compare and contrast data across different projects as there are substantial batch effects  
9 from computational processing, single cell technology utilized, and the natural biological variation. While many  
10 single cell transcriptome specific batch correction methods purport to remove the technical noise it is difficult to  
11 ascertain which method functions works best. We developed a lightweight R package (scPOP) that brings in batch  
12 integration methods and uses a simple heuristic to balance batch merging and celltype/cluster purity. We use this  
13 package along with a Snakefile based workflow system to demonstrate how to optimally merge 766,615 cells from  
14 33 retina datasets and three species to create a massive ocular single cell transcriptome meta-atlas. This provides a  
15 model how to efficiently create meta-atlases for tissues and cells of interest.

16 <sup>1</sup> Bioinformatics Group, Ophthalmic Genetics & Visual Function Branch, National Eye Institute, National  
17 Institutes of Health

18 <sup>2</sup> Medical Genetics and Ophthalmic Genomics Unit, National Eye Institute, National Institutes of Health

19 □ Correspondence: [David M McGaughey <mcgaugheyd@mail.nih.gov>](mailto:mcgaugheyd@mail.nih.gov)

## 20 **Introduction**

### 21 **A plethora of single-cell transcriptome studies in the retina**

22 The retina contains a multitude of cell types that, in total, are responsible for turning light information into  
23 signal for the brain to interpret as vision. Very briefly, the photoreceptors (rods and cones) are responsible for  
24 capturing the photons. The retinal pigmented epithelium (RPE) behind the photoreceptors physically support the  
25 rods and cones by processing byproducts of the visual cycle. Müller glia serve as support cells for the neurons. The  
26 retinal bipolar cells transmit the electrical signal from the photoreceptors to the retinal ganglion cells. Horizontal and  
27 amacrine cells regulate and help interpret signals from the photoreceptors. The signal is relayed via the retinal

28 ganglion projections through the optic stalk to the brain (for review see).<sup>1</sup> Since 2000 many groups have investigated  
29 gene expression in small numbers of individual cells of the retina.<sup>2-5</sup>

30 The recent introduction of lower cost and high throughput single cell sequencing technology has led to an  
31 explosion of research across many fields. As of early 2021, over 40 million cells have been sequenced across over  
32 1,200 studies and the average size of each study starting in 2020 is over 100,000 cells.<sup>6</sup> The retina was used as the  
33 source tissue in one of the earliest works in the high throughput single cell transcriptomics field.<sup>7</sup> As of late 2020,  
34 over twenty published studies, cumulatively containing over a million cells, have used single cell technology to  
35 profile cell type specific gene expression patterns, cell fate trajectory, tissue and cell differentiation, and disease  
36 perturbation across multiple mammalian species.<sup>7-15,15-19,19-29</sup>

37 While the gene - cell count tables are generally made available in repositories like the Gene Expression  
38 Omnibus (GEO), there are no requirements to uniformly process the data. This means the count tables cannot be  
39 used in cross-study comparisons as even small differences in the computational pipeline (aligner, transcriptome  
40 reference, etc.) create study-specific effects. This issue can be addressed only by re-quantifying the data in a uniform  
41 computational environment. Fortunately, due to the continued development of computationally light-weight gene  
42 quantification tools in the single-cell space (e.g kallisto bustools, alevin-fry), re-quantification does not require  
43 massive compute and time resources.<sup>30,31</sup>

44 Still, even after re-quantification under identical computational conditions there remain study specific batch  
45 effects due to the diversity in single cell technologies used and variation in tissue handling and processing across  
46 each scientific group. The single cell community has recognized that removal of these technical (also referred to as  
47 batch) effects is a critical issue and have independently developed many tools, though it remains unclear which tools  
48 and parameters are optimal for a particular dataset.<sup>32-43</sup> Reinforcing this point, a couple groups have quantified  
49 performance of multiple methods in a consistent framework across several test datasets, finding no consistently best  
50 approach.<sup>44,45</sup>

## 51 **The projectable meta-atlas**

52 We propose that by re-processing publicly available raw single cell transcriptome data in a consistent  
53 bioinformatic framework and optimally using batch correction tools we can create a meta-atlas of retina single cell  
54 transcriptomes. As there are thousands of possible permutations of single cell tools, references, and parameter

55 choices, we create our meta-atlas (which we refer to as the single cell Eye in a Disk or scEiaD) by benchmarking  
56 integration outcomes across multiple important single cell RNA-seq processing parameters (batch removal method,  
57 number of hyper-variable genes (HVGs), clustering resolution, etc.). The benchmarking system we developed uses a  
58 wide variety of metrics that combine in the R package scPOP (single-cell Pick Optimal Parameters). The scEiaD  
59 will be of utility to two communities. First, the ocular community who can both search scEiaD for gene expression  
60 across many dimensions (e.g. cluster, cell type, study) and project their own single cell data onto scEiaD for  
61 comparison and rich automatic cell labeling. Second, the computational community can use this very large, well-  
62 curated dataset to test algorithms for compute efficiency and performance in a diverse environment. As we believe  
63 data re-use is a powerful and efficient approach to facilitate discovery, we provide our meta-atlas code-base, the  
64 meta-atlas in several data formats, and propose general guidelines to optimally create custom meta-atlases.

## 65 **Results**

### 66 **We identify 33 ocular scRNA datasets across 3 species**

67 The first step in building a meta-atlas is identifying studies to draw the data from. We identified ocular  
68 single cell RNA sequencing (scRNA) studies by querying PubMed, the Sequence Read Archive (SRA), and the  
69 European Nucleotide Archive (ENA) for the inclusive terms “retina,” “single cell,” “scRNA,” “ocular,” “eye,”  
70 “transcriptome.” We then hand filtered the results to only keep ocular and normal (non-perturbed or mutagenized)  
71 data from single cell RNA-seq technology. On December 2020 we identified 33 deposited datasets that have been  
72 published in 27 publications (Figure 1). To provide a non-ocular reference we also downloaded the raw sequence  
73 data from the Tabula Muris project for re-processing. In cases where the fastq file from from the SRA was not  
74 processed properly (always 10x v2 or v3), we acquired the 10x bam files (via SRA or personal correspondence) and  
75 re-extracted the fastq. After downloading all the data we had 11 TB across 2470 fastq file sets.

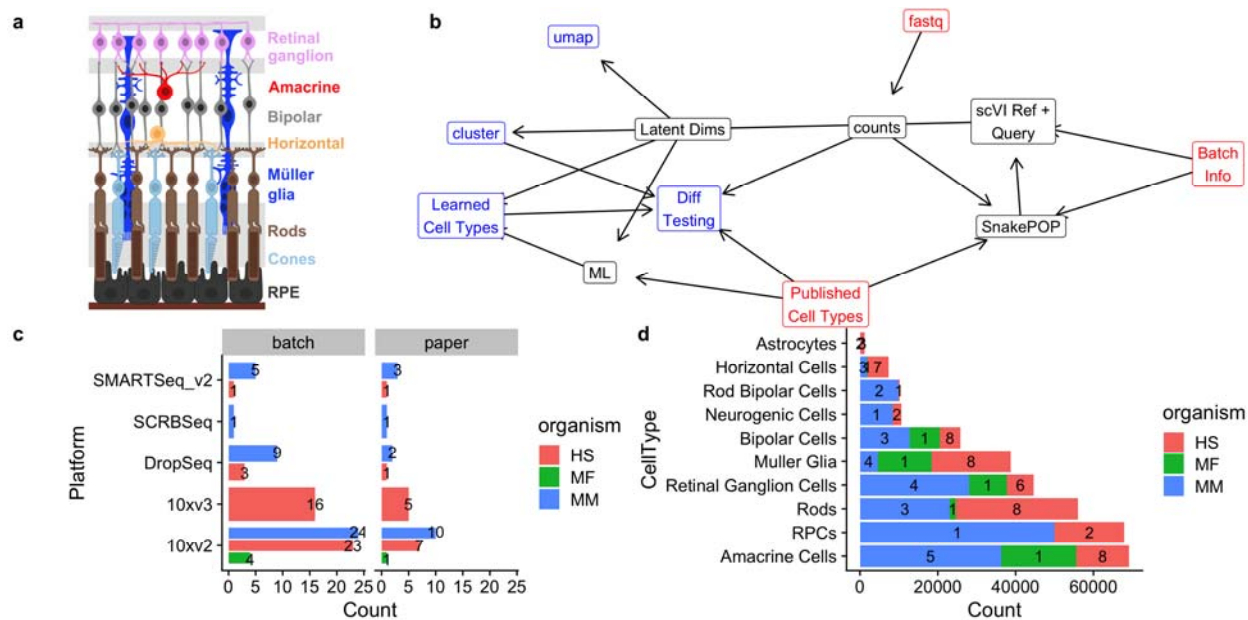

76

77 *Figure 1: a. Schematic of the retina with major cell types delineated b. Simplified directed workflow of major steps*  
 78 *in scEiaD creation from raw counts to gene counts, benchmarking optimal integration methods (SnakePOP) to*  
 79 *produce batch corrected latent dimensions (Latent Dims), then downstream analysis outputs like clustering,*  
 80 *differential gene testing (Diff Testing), and 2D UMAP visualization. c. Counts of published papers and batches*  
 81 *(unique biological samples) for each scRNA technology, split by organism d. Cell type counts extracted from*  
 82 *published studies for the more common retina cell types, split by species. Count of study accessions for each species*  
 83 *overlaid on bar plot.*

## 84 Transcriptome quantification across multiple technologies

85 Droplet and well based scRNA-seq technologies require different quantification approaches as the former  
 86 have UMI and multiple cells are quantified within a single file. We wrote a Snakemake based pipeline  
 87 (SnakeQUANT, see methods) to quantify and merge both droplet and well based technologies into a single matrix  
 88 for downstream processing. For well based data we perform both gene and isoform level quantification; for droplet  
 89 base technologies we quantify both exonic and intronic gene-level expression to facilitate calculation of RNA  
 90 velocity. In total we quantify 6.7e+10 molecules, finding 1.1e+10 unique molecules with a mean pseudoalignment  
 91 rate of 66.5%. Across the 766,615 cells (post QC) we have an average of 3,410 RNA counts across 978 unique genes  
 92 (see Supplemental File kallisto\_stats.tsv and splicing\_stats.tsv for more details).

## 93 1,204,269 cells before quality control

94 Gene-level counts were quantified with the kallisto bustools pseudo-aligner for both the droplet and well  
 95 based samples. After empty droplet removal, we had 1,204,269 cells. We then removed cells which had more than  
 96 10% mitochondrial reads across all gene counts, fewer than 200 unique genes quantified, or were identified as an *in*

97 *silico* doublet (see methods). After these quality control (for review see<sup>46</sup>) steps we were left with 766,615 cells  
98 (Supplemental Figure 1).

99 A core objective of many scRNA based studies is labeling the cell types. As this information is crucial to  
100 assess dataset integration and provide an accurate reference for user querying, we extracted individual cell labels  
101 with a combination of inspecting the GEO web site, supplemental information from the publication, web resources  
102 (e.g. a web app was created for the paper), and personal correspondence. After normalizing cell type name  
103 nomenclature, we obtained labels for 375,966 cells across 33 cell types (Supplemental Table 1).

## 104 **Running 11 tools in a Snakemake-based system**

105 Disentangling the technical and biological effects when integrating multiple datasets is crucial. We define  
106 batch as each unique biological sample and assume each study is at least one unique sample. We studied the  
107 metadata and methods of each study to identify the unique biological samples. Within the current scEiaD data set we  
108 identified 86 batches across 33 deposited datasets in 26 published papers.

109 A wide variety of methods have been written for scRNA-seq integration. As we were uncertain which  
110 would perform the best, we ran 11 tools with a commonly used set of key parameters like number of highly variable  
111 genes (HVG), number of latent dimensional space, and the number of nearest neighbors for the louvain clustering  
112 algorithm. The Snakemake system was used to automate the running of the wide variety of tools. In total 5,591 jobs  
113 were run to quantify gene expression and build the unified Seurat objects (SnakeQUANT) and 2,446 jobs were run  
114 to assess integration performance (SnakePOP).

115 The two key metrics which have to be balanced in order to optimize integration performance are cell type  
116 or cluster purity (where different cell types or clusters should be homogenous) and batch mixing (the same cell types  
117 should be similar across independent studies). While these can be visually assessed by looking at marker gene  
118 expression across the 2D UMAP projection, it is more rigorous and scalable to quantify these diametrically opposed  
119 characteristics.

## 120 **scPOP wraps several different methods for measuring integration performance.**

121 Multiple methods have been proposed to quantitatively evaluate batch correction. Some of these metrics  
122 evaluate the concordance between sets of labels, while other compute distances between the individual data points of

123 a given set of labels. While any one of these methods can be useful, we propose that calculating and evaluating them  
124 in tandem provides greater accuracy for dataset integration. We developed the R package scPOP, a lightweight, low  
125 dependency R package which brings together the Local Simpson Index (LISI), Average Silhouette Width (ASW),  
126 Adjusted Rand Index (ARI) and Normalized Mutual Information (NMI) metrics from the R packages Harmony,  
127 kBET and aricode, respectively. The LISI and ASW were used to measure batch mixing (where lower is better), cell  
128 type mixing (higher is better), and cluster mixing (higher is better). NMI and ARI were used to assess the  
129 consistency of cell type to cluster assignment (where 1 is perfect correspondence between cluster and cell type).

130 To visualize the interplay between batch mixing and cell type distinction we plot the batch mixing LISI  
131 score (which has been multiplied by -1) on the y-axis (higher is better) against the cluster LISI on the x-axis (higher  
132 is better). The best performer on both metrics will be in the top right corner (Supplemental Figure 2a). In the same  
133 manner we plot the silhouette metric (Supplemental Figure 2 b). To merge the different scores we define  
134  $sumZScale = \sum scale(m * weight)$  where  $m$  is a metric (LISI by batch, LISI by cluster, LISI by cell type,  
135 silhouette by batch, silhouette by cluster, silhouette by celltype, NMI, and ARI). Weight is set to one, but can be  
136 either explicitly set or randomly chosen should it be desired to change the influence of certain metrics.

137 On one extreme we have ComBat, which merges together different batches very well, but also mixes  
138 together the distinct cell types (Figure 2a). The other extreme is not using any batch integration method, where you  
139 see very distinct groups of cells, but also each nearly study is has a distinct region in the UMAP (Figure 2b). In our  
140 scEiaD dataset we see that methods like ComBat, Harmony, scArches, CCA are weighed more towards batch mixing  
141 then cluster and cell type purity. Scanorama and bbknn prioritize cleanly separating the clusters. With our scEiaD  
142 meta-atlas insct, trVAE, and magic do not perform particularly well in batch mixing or cluster purity. Overall, CCA,  
143 fastMNN, and scVI perform best on this particular dataset. For further qualitative investigation of the integration  
144 performance we provide the UMAP visualizations of each integration method, normalization, and latent dimensions  
145 colored by cell type, study accession, or organism as supplementary files.

146 As the LISI and silhouette metrics provide independent cluster and cell type (“purity”) and batch  
147 (“mixing”) scores we looked to see whether the sumZScale scoring is highly influenced by changing the weight  
148 placed on purity or mixing by multiplying either by a multiplier of three (Supplemental Figure 3). While scVI still  
149 performed well, no matter the weight chosen, there were some changes when more weight was placed on batch

150 mixing. Most notably fastMNN with 8 latent dims performed better than fastMNN with 30 latent dims. In a reversal  
151 of the fastMNN results, CCA with 30 latent dimensions performed better than CCA with 8 latent dimensions. We  
152 also bootstrap random weights across each individual metric and get similar results (Supplemental Figure 4). Across  
153 the 11 integration methods we tested, scVI achieved the highest sumZScale for our scEiaD meta-atlas and  
154 furthermore is a desirable choice because of its very short run time (scVI can complete in less than an hour while  
155 fastMNN takes over 12 hours and CCA takes more than 24 hours).

## 156 **Different normalization methods alter integration performance**

157 There are several normalization approaches that have been used or published. The “standard” approach that  
158 the popular analysis packages Seurat and scanpy use by default is to, per cell, divide the counts by the sum counts  
159 for the cell, multiply by a scaling factor, then log transform. This helps make the count distribution more normal,  
160 which is an assumption that many algorithms require. In contrast, the scan normalization method groups cells into  
161 pools and normalizes across the pool summed counts instead of the individual cell counts. We also use the square  
162 root (sqrt) normalization which replaces the log transformation with a square root. Library size (libSize)  
163 normalization omits the sqrt or log transformation. Finally some methods, like scVI, directly use the raw counts for  
164 modeling the data.

165 As expected the libSize normalization which omits the log or square root scaling generally performs the  
166 worst (Figure 2c). We see that the remaining normalization techniques alter the batch correction performance,  
167 though the outcome differs across the different methods. We also see that changing the number of latent dimensions  
168 (8 or 30) can occasionally dramatically change performance. These results demonstrate the importance of assessing  
169 performance in a rigorous manner across many parameters.



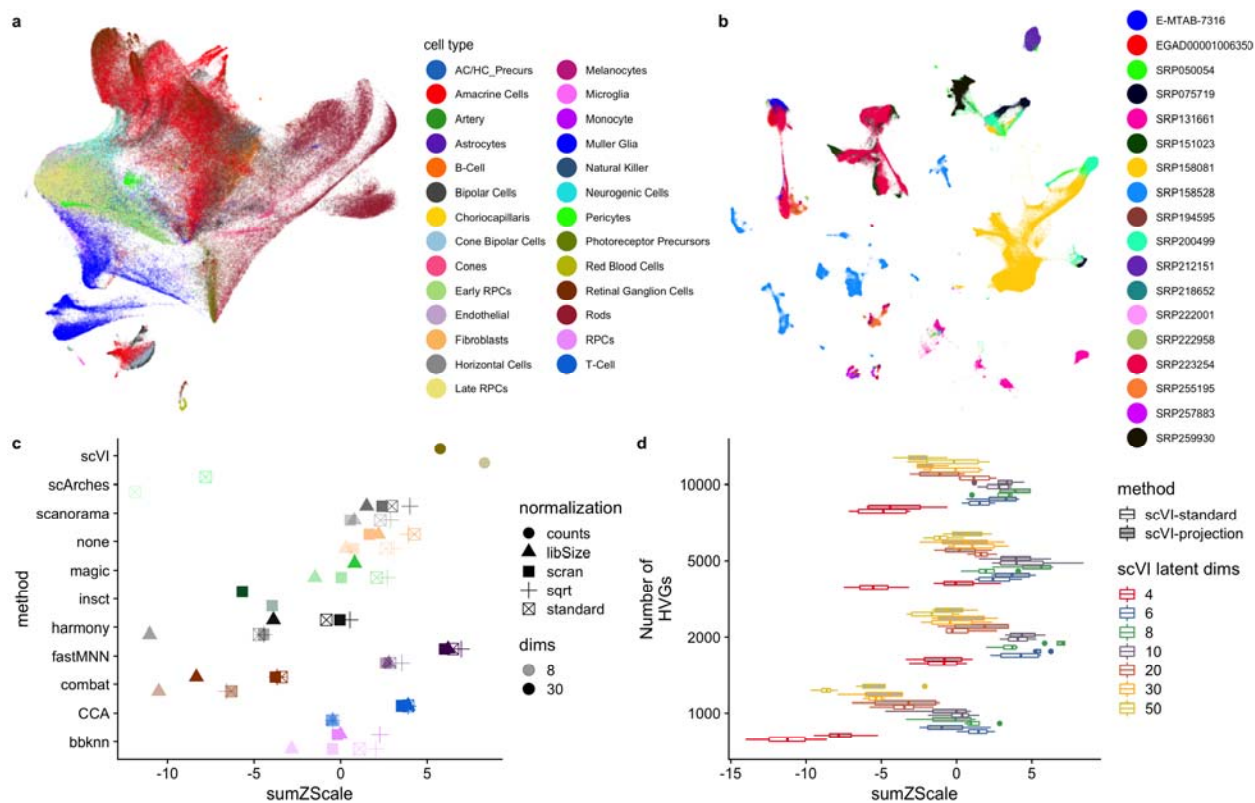

170

171 *Figure 2: a. Example of a method (combat) which has a high level of batch blending, but poor separation of cell*  
 172 *types (colored by cell type). b. no batch correction cleanly separates cell types but does not mix batches (colored by*  
 173 *study). c. sumZScale (higher is better) for each method across a variety of data normalizations. All methods shown*  
 174 *here use 2000 HVG, louvain clustering with knn 20, and 8 or 30 latent dimensions. Each color is a different method.*  
 175 *d. Boxplot of 4 different clustering resolutions for across 1000 to 10000 HVG numbers and 4 to 50 scVI latent*  
 176 *dimensions. Open boxes are using scVI-standard and gray boxes are scVI-projection (human reference with the*  
 177 *remaining data projected)*

## 178 Further optimization of scVI with grid search and projection

179 To find the best set of parameters for scVI in our dataset we did a grid search across key parameters: HVG,  
 180 latent dimensions, and k nearest neighbors. Furthermore we used a recent advance in scVI capability ( $\geq$  version  
 181 0.8.0) adapted from scArches that allows one to build a reference model and query or project the new cells onto it.<sup>40</sup>  
 182 We refer to this projectable model as “scVI-projection,” and the previous scVI model as “scVI-standard.” We built a  
 183 scVI-projected model trained on human cells and then projected the mouse and macaque data onto it. We then  
 184 compared scVI-projection against the previous scVI-standard across all the previously mentioned  
 185 parameters. Using scPOP we first saw that the scVI-projection approach generally performed better than running  
 186 scVI with all of the data (Figure 2d). We found the optimal overall parameters to be 5000 HVG, 8 latent dimensions,  
 187 and with 5 k-nearest neighbors for the cluster finding. We also varied the UMAP projection values of nearest



188 neighbors and minimum distance to qualitatively pick a 2D projection, selecting a minimum distance of 0.1 and 50  
189 nearest neighbors.

## 190 **High accuracy xgboost ML model built to label unknown cell types across all technologies**

191 To further study cell type specific expression patterning we needed to label the 414,106 unlabeled cells.  
192 Traditionally this is done by clustering the cells, then using cell type specific markers to label the clusters. However,  
193 as we had hundreds of thousands of expert labeled cells across 17 publications (Figure 1a) we built a xgboost-based  
194 machine learning model that used 2/3 of the labeled cells as a training set (see methods for more details) to train a  
195 cell type predictor for scEiaD input. The trained model was used to predict the cell type assignments for all cells in  
196 scEiaD. In this manner we both label most cells (cells which cannot assign a cell type with a probability above 0.5  
197 were left unlabeled) and correct a small number of probable mislabels in the truth set (Figure 3a).

198 As a brief case study of our ML performance, we look at the cell type labels assigned to the Shekhar et  
199 al. study where they used SMART-seq on a retinal bipolar cell enriched population of cells<sup>21</sup>. Even though our ML  
200 algorithm was trained only on droplet-based data, our algorithm labels most of this dataset as retinal bipolar cells,  
201 with the next most common cell types being amacrine. The same result was found by Shekhar et al. (Supplemental  
202 Figure 5). To more generally evaluate performance we use the precision recall (PR) curve, which visualizes the  
203 ability of the model to precisely label known cells at a given confidence. The area under the PR curve (AUC)  
204 summarizes the effectiveness of the model across different cell types, with 1 being the highest performance. The  
205 xgboost model can predict rods, bipolar cells, and Müller glia with near perfect performance (Supplemental Figure  
206 6). Most of the remaining cell types can be predicted with an AUC over 0.9 Supplemental Table 2. Several of the  
207 precursor cell types (photoreceptor, AC/HC, and neurogenic) were labeled with lower confidence Supplemental  
208 Table 3. The next most common labels for these cell types were either other precursor cells (e.g. 100 AC/HC  
209 Precursors were labeled as Neurogenic) or the adjacent terminal cell type (e.g. 254 photoreceptor precursors were  
210 labeled as cones). Other cell types that were challenging for the model to predict were the artery, choriocapillaris,  
211 and vein. Artery, choriocapillaris, and vein are constructed from endothelial cells and we find that for all three of  
212 these, endothelial was the second most common label. Overall, our xgboost based ML model shows strong accuracy  
213 across the major cell types of the retina (overall AUC of 0.98).

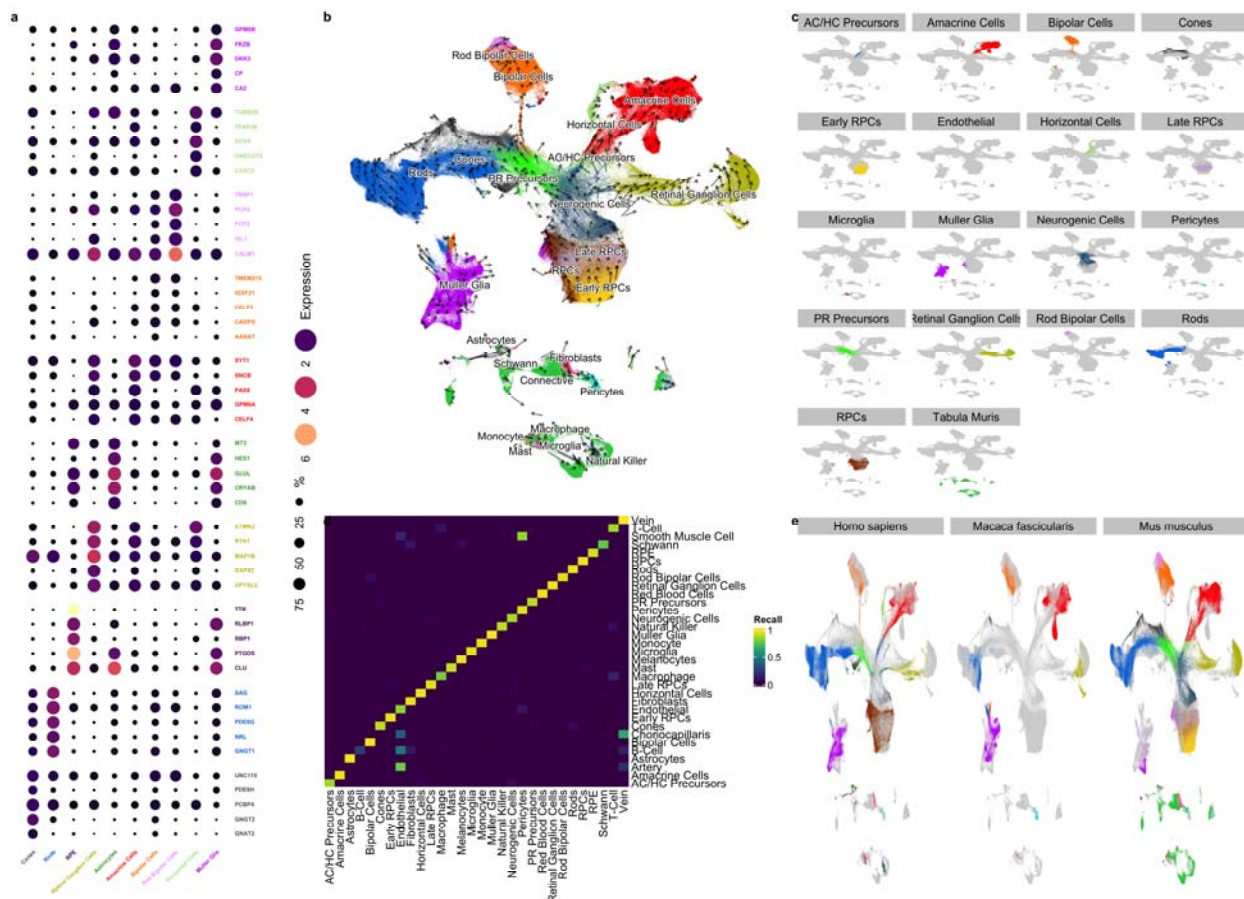

214

215 *Figure 3: a. Top genes that are differentially expressed across the major cell types of the retina (PR is short for*  
 216 *Photoreceptor). Genes are colored by which cell type they are differentially expressed in. The dot size is*  
 217 *proportional to the percentage of those cells that have detectable levels of the gene. The color of the dot is the log2*  
 218 *scaled CPM expression. b. 2D UMAP projection of scEiaD, colored by cell type (Tabula Muris data is gray). Arrows*  
 219 *are scvelo RNA velocity. Longer arrows are cells with higher velocity (relatively more unspliced transcripts).*  
 220 *c. Facet plot that demonstrates how each major cell type of the retina is contained within a distinct space.*  
 221 *d. Confusion matrix of cell type prediction performance of our xgboost labeller between predicted (x axis) and*  
 222 *known (y axis) using data withheld from the machine learner. Most of the cell types are indeed labeled as their true*  
 223 *type. e. Faceting of 2D UMAP by species and colored by cell type demonstrate how the major cell types of the retina*  
 224 *share space with like cell types, despite being from mouse, human, and macaque.*

## 225 ML cell type labels result in high study diversity for each cell type

226 After ML projection of cell type labels from the original 375966 labels onto a total of 758278 cells we have  
 227 substantially improved the number of studies per cell type. For example, we went from 8 human studies with labeled  
 228 Müller Glia to 14 after labeling (Supplemental Table 4). Overall we go from an average of 4 studies per human cell  
 229 type to 8 and 2 studies per mouse cell type to 8 after transferring the cell type labels.

230 As another check on the quality of the cell type assignments, we ran the cell and cluster independent  
 231 haystack gene search and pairwise differential expression tests between the predicted cell types (see methods for

232 further details).<sup>47</sup> We show the five most differentially expressed genes for each of the major retina cell types are  
233 consistent with known retinal cell markers (Figure 3a). As a simple metric to identify known and unknown genes  
234 relating to the cell type specific expression we search PubMed for the number of publications with two searches per  
235 gene. We expect most of the genes identified to be known in the literature. The first search is the more precise “gene  
236 AND cell type” (e.g. “PDE6H AND Cones”) and the second search is the more inclusive “gene AND retina”  
237 (e.g. “PDE6H AND Retina”). Of the 50 genes in (Figure 3a), 37 had one or more citations in the gene - cell type  
238 search (Supplemental File celltype\_markers.tsv) and 45 had one or more citation in the inclusive search. The 50  
239 genes had a mean of 46 studies (with the inclusive gene by “retina” search). In contrast, 100 randomly chosen genes  
240 had a mean of 2 (wilcox test  $p < 1.44 \times 10^{*-17}$ ).

## 241 **The scVI-based scEiaD UMAP projection blends batches and species while separating cell** 242 **types**

243 The 2D UMAP projection of the scVI-calculated batch corrected 8 latent dimensional space blends the 33  
244 studies together while also maintaining distinct space for the 31 unique cell types. We also see good mixing across  
245 all the droplet and well based single cell technologies (Supplemental Figure 7). We see the neurogenic and  
246 progenitor populations from which the retinal cell types are derived near the center of the UMAP visualization. The  
247 photoreceptor precursors are adjacent to the neurogenic population and, as demonstrated by the RNA velocity  
248 dynamics, flow into the rods and cones. The amacrine and horizontal precursors (AC/HC) likewise flow from the  
249 neurogenic center into the mature amacrine and horizontal cells.

250 The photoreceptors (cones and rods) of the retina which are responsible for color and low-light vision,  
251 respectively, are near each other in the UMAP space. The major remaining retina cell types, by proportion in the  
252 mammalian eye are the Müller Glia, which are a glial cell type which help support the neurons of the retina. Next we  
253 have the neural cell types which transmit and help interpret the signals from the photoreceptors before they leave the  
254 retina via the optic stalk: the amacrine cells, retinal ganglia, horizontal, and bipolar cells. All of these cells are in  
255 well separated spaces in the UMAP. Finally we see across species that the major cell types overlap each other  
256 (Figure 3d). The macaque retina cells are not present in the precursor/neurogenic center of the UMAP as expected  
257 because only fully developed tissues were sampled in these data.

258 While by eye the UMAP 2D projection generally blends together the three different species (macaque,  
259 mouse, human) in the UMAP visualization, we more rigorously tested this by changing the inputs to our xgboost cell  
260 type predictor machine learning system. We trained two new models: one with only human data and one with only  
261 mouse data. We then applied this model to the other two species to see whether the model trained on one species was  
262 generally transferable to another species. Again, both models (human only and mouse only) both proved to be highly  
263 accurate at predicting cell types in the other species with the terminal cell types (Supplemental Figure 8).

## 264 **Projection of outside data onto scEiaD demonstrates similarities and differences of iPSC** 265 **and organoids to primary cells**

266 The hard work of creating this resource can be leveraged and extended by the wider community with a few  
267 relatively simple steps and modest compute requirements. Very briefly, if outside groups quantify their mouse or  
268 human scRNA with kallisto (bustools) and the same references (see methods), they can overlay their data on top of  
269 scEiaD by 1. installing scVI (version 0.9.0 or higher), 2. downloading our 13 megabyte scVI model, and 3.  
270 following the Jupyter notebook on Google colab that we provide as a live demo available from  
271 <https://github.com/davemcg/scEiaD>. We demonstrate the power of this approach in two ways.

272 First, a wild-type retinal organoid dataset from Kallman et al was projected onto scEiaD.<sup>48</sup> In the Google  
273 colab notebook we show how a subset of the reads from Kallman et al.'s SRR12130660 can be processed from the  
274 raw reads to a UMAP visualization in under 10 minutes. Indeed we see how organoid-based retinal cell types can be  
275 detected overlapping primary cells for RPCs, photoreceptors, amacrine cells, and retinal ganglion cells  
276 (Supplemental Figure 9).

277 Finally, we demonstrate how the RPE derived from the Bharti iPSC differentiation process express  
278 canonical RPE markers of TTR and RPE65 but end up in a slightly different position in the UMAP projection (Figure  
279 4a). Differential expression analysis (see methods) identified that vimentin is nearly exclusively expressed in the  
280 iPSC-based RPE (Figure 4b). This result is not surprising as Hunt et al. demonstrated that cultured and proliferating  
281 RPE express high levels of vimentin<sup>49</sup> and this same trend is seen in bulk RNA-seq from stem cell RPE and primary  
282 RPE (Supplemental Figure 10).<sup>50</sup>

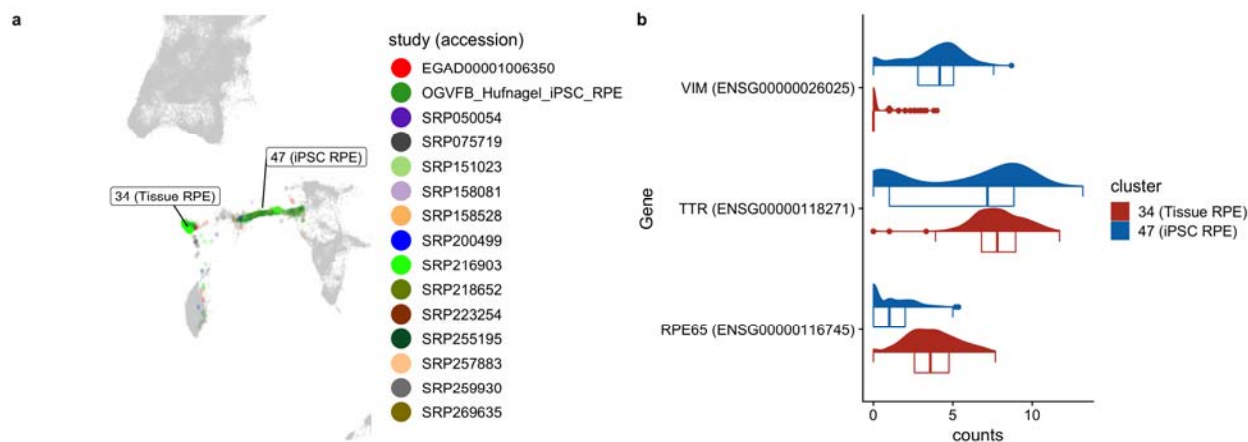

283

284 *Figure 4: a. RPE distribution colored by study demonstrates how the most RPE are in two locations. iPSC-based*  
285 *RPE we provided are located more enriched in cluster 47. Tissue RPE more enriched in cluster 34 b. Violin plot of*  
286 *two functional RPE markers (TTR, RPE65) and vimentin (proliferating RPE marker)*

## 287 **Methods**

### 288 **Reproducibility and data availability**

289 The set of Snakemake pipelines that takes in the raw fastq sequence and outputs the scEiaD is at  
290 <https://github.com/davemcg/scEiad>.<sup>51</sup> The publication commit is #ffdf738. Furthermore, the repository has been  
291 deposited at Zenodo under 10.5281/zenodo.5129265 We will briefly discuss the pipeline choices, programs and  
292 algorithms, and versions below. For the R packages, we provide package versions as the supplementary file  
293 “R\_session\_info.txt”

294 We have deposited the 10x (v2) fastq files for our iPSC-based RPE data in GEO at accession GSE180662.  
295 We give download links for the count matrices, seurat and anndata objects, cell level metadata, and our codebases in  
296 Supplemental Table 5.

### 297 **Quantification of gene counts**

298 Gene quantification is handled by the SnakeQUANT snakefile. First, we generated multiple quantification  
299 indices to facilitate calculation of RNA velocity. For each droplet technology, we generated a separate set of  
300 transcript sequences that contain both exonic and intronic sequences using the “get\_velocity\_files” function from the  
301 R package BUSpaRse. The reference transcriptome annotation used to build sets of transcript sequences were the  
302 Gencode “gencode.vM25.annotation.gtf.gz” and “gencode.v35.annotation.gtf.gz” for mouse and human,

303 respectively.<sup>52,53</sup> Because the *Macaca Fascicularis* genome is less well annotated we used the Ensembl release 101  
304 genome and transcriptome annotation “*Macaca\_mulatta.Mmul\_101.gtf.gz*.”<sup>54</sup> A single set of exonic transcript  
305 sequences was created for each species for all well technologies. A kallisto quantification index was generated for  
306 each of these fastqs using kallisto index (0.46.2).<sup>55</sup> Well based samples were quantified using kallisto quant. For the  
307 relatively few single ended samples, the params “-single -l 200 -s 30” were used for kallisto quant. Otherwise the “-  
308 bias” flag was added. For the droplet-based samples, we adapted the bustools workflow for generating spliced and  
309 unspliced count matrices. (0.39.4).<sup>56</sup>

### 310 **Intersection of gene names between mouse, macaque, and human**

311 To facilitate comparison of gene expression across species, where possible we converted mouse and  
312 macaque gene ids and names to human ones. We downloaded a mapping of orthologous genes between human,  
313 mouse, and macaque using the Ensembl BioMart web browser in November 2020. We identified 15,759 human  
314 genes that could be directly mapped to mouse and macaque orthologs. Genes present in mouse or macaque that were  
315 not found in human were not used for HVG gene selection, but were retained and used for differential gene  
316 expression.

### 317 **Custom macaque reference quantification**

318 As we noticed that several retina marker genes (e.g. *NRL* and *CRX*) had very low expression in the  
319 macaque data we quantified the scRNA data twice: once with the Ensembl reference and again with the same  
320 Gencode human reference used for the human data. We compared the gene-level counts for each cell and replaced  
321 the macaque gene count with the human counts if the human counts were greater than the macaque counts and, to  
322 prevent genes with very few total counts from being used, we required the counts greater than the first quartile of  
323 non-zero macaque gene expression.

### 324 **Remove empty droplets and further QC.**

325 After bustools count, we used R (3.6.2) to remove empty droplets. The BUSpaRse package was used to  
326 input the bustools counts mtx file. The DropletUtils package with the “barcodeRanks” function was used to  
327 automatically detect the inflection point in the barcode count ranks that delineates the likely empty droplets.<sup>57</sup> We  
328 then removed cells with percent mitochondrial reads of >10%. After merging the individual count matrices into one



329 sparse matrix, we created a Seurat version 3 object and removed cells with fewer than 200 detected unique genes,  
330 and for the droplet data, more than 3000 detected genes (these are more likely to be doublets).<sup>32</sup>

### 331 **Normalization and batch effect correction**

332 The following steps (normalization through benchmarking are handled by the SnakePOP pipeline) We  
333 tested several gene count normalization approaches as we were not certain which would produce an optimal  
334 outcome: standard (default Seurat, library size normalization, then log transform), sqrt (same, but with sqrt  
335 normalization), libSize (omit the log or sqrt normalization), scran, SCT from Seurat, and for scVI, no normalization  
336 (counts).<sup>58</sup> Our R implementation of the normalization approaches as well as how we constructed the Seurat v3  
337 object can be found in the supplementary file “make\_seurat\_obj\_functions.R”

### 338 **Batch normalization under a grid search procedure**

339 We tested scArches, bbknn, insct, magic, scVI, CCA, scanorama, harmony, fastMNN, combat, none against  
340 2000 HVGs, the different gene count normalization procedures discussed above, and both 8 and 30 outputted batch  
341 corrected latent dimensions. The latent dimensions are the input for clustering, the 2D UMAP visualization, and the  
342 xgboost machine learning to transfer cell type labels to unlabeled cells. We were unable to run every method  
343 successfully with every normalization method. For example, magic could not complete with the standard or libSize  
344 normalization. Insct was only able to complete the scran normalization. We also tried the DESC, liger, and Conos  
345 batch corrections methods but were unable to get them to work reliably so they were dropped. While we attempted  
346 to use “default” parameters wherever possible, we had to deviate from this to get Seurat’s CCA procedure to  
347 complete. CCA reciprocally tries to integrate all batches and even with a subset of cells we regularly got “long  
348 vector” errors. We got around this issue by setting the human batches as the “reference.” The batch correction steps  
349 implementation can be found the supplementary file “merge\_methods.R” and in the github repo  
350 ([https://github.com/davemcg/scEiaD/blob/master/src/merge\\_methods.R](https://github.com/davemcg/scEiaD/blob/master/src/merge_methods.R)).

### 351 **Clustering and UMAP**

352 Louvain-Jaccard clustering against the batch corrected latent dimensions used the Seurat implementation.<sup>59</sup>  
353 For the all methods benchmarking we used k-nearest neighbors (knn) of 20. For the scVI-only tuning reduced the  
354 knn parameters to 5 and 7 (where 5 gives more clusters than 7) to increase the cluster number. We also used the  
355 leiden algorithm as implemented by PARC with a resolution of 0.6 and 0.8 (higher results in more clusters).<sup>60,61</sup>



356 These two resolutions were chosen as they roughly gave the same number of clusters at the Seurat Louvain-Jaccard  
357 approach with a knn 7.

358 The UMAP visualization was calculated with the Seurat “RunUMAP” using the uwot R package.<sup>62</sup> We  
359 tried min.dist parameters of 0.001, 0.1, and 0.3 and tried n.neighbors across 15, 30, 100, and 500. A smaller min.dist  
360 value gives “tighter” groupings while a higher number of n.neighbors uses a larger number of near cells to calculate  
361 the global positioning.

## 362 **Benchmarking and scPOP**

363 We wrote the scPOP R package to unify the LISI and Silhouette metrics from Harmony and kBet,  
364 respectively, along with NMI and ARI.<sup>36,63</sup> LISI and Silhouette require a dense matrix, which is a problem for our  
365 data as a 766615 cell by 8 latent dimension dense matrix cannot fit in our largest available compute node (1.5 TB).  
366 We down-sampled the dataset to ~100,000 cells, taking care to keep all rarer cell types for the LISI and Silhouette  
367 benchmarking.

368 To merge these metrics into a balanced single score, we Z scale each and sum them. scPOP produces both  
369 tables and visualizations allowing the user to quickly see both the interplay of batch mixing and cluster/cell type  
370 separation and the overall performance. If a user wishes to prioritize batch mixing or cluster/cell type separation we  
371 let the user provide a custom batch/cluster-cell type scaling value (1 is the default).

## 372 **Multi-step doublet removal**

373 To identify probable doublets (more than one cell in a droplet) we ran DoubletDetect and scrublet and  
374 calculated the distribution of DoubletDetect and scrublet scores across all clusters and removed clusters with a score  
375 in both metrics greater than 4 standard deviations above the mean.<sup>64,65</sup> This removed another 23,457 cells, leaving  
376 766,615 in total.

## 377 **xgboost based cell type model**

378 In order to identify cell types for the 361,456 unlabeled cells we designed a custom xgboost based cell type  
379 classifier. We took labeled data and split it into training (2/3) and test (1/3) sets, stratified by cell type. The input  
380 features used to train the model are the scVI latent dimensions, the total number of reads in each cell, the number  
381 genes detected in each cell, and the percent mitochondrial gene expression of each cell. We additionally generated

382 features using the age of each sample by group sample into three developmental categories (Early Development,  
383 Late Development, and Adult) and then generated a one-hot encoded feature for each category. In order to speed up  
384 training times, we used the gpu implementation of the xgboost algorithm from the the xgboost python library. The  
385 model was trained using default parameters. The trained model had an overall macro and micro AUC score of 0.98  
386 and 0.99, respectively. This model was then used to identify labels for all cells. Unlabeled data was pre-processed  
387 identically to training data and fed into model to generate a vector of label probabilities for each cell. We selected  
388 the highest label probability for each cell, and required a minimum probability of 0.5 to assign a label to a cell.

389 For the organism specific xgboost ML we followed the above procedure, except that we combined Early  
390 RPCs, Late RPCs, and RPCs into one category and did not attempt to predict the non-retina cell types  
391 (e.g. fibroblasts) as there were very few labeled cells across all three organisms.

## 392 **Marker gene identification**

393 To identify marker genes across the CellType (predict) and cluster groups, we used the scran findmarkers  
394 (wilcox test) along with the singleCellHaystack algorithm.<sup>47</sup> The scran findmarkers test runs a wilcox test in a  
395 pairwise manner (e.g. Rods vs all other cell types). It returns an overall p-value (and FDR) that assesses how well  
396 the gene is at separating the group of interest from all other cells. It also returns for each pair-wise comparison an  
397 area under the curve (AUC) score, where 1 is a perfect power to distinguish and 0 is no power. The  
398 singleCellHaystack algorithm uses a Kullback-Leibler divergence (D KL) measurement of the scVI lower  
399 dimensional space to identify genes with non-random distribution. A higher D KL score represents a gene with  
400 “specific” expression in the lower dimensional space and is used to calculate a FDR corrected p value against the  
401 full distribution of D KL values. We filtered to keep genes with scran FDR < 1, a mean AUC > 0.2, and a log10(D  
402 KL FDR) < -10000. No more than 50 genes for each cell type were retained (sorted by mean AUC).

## 403 **Calculation of RNA velocity**

404 RNA velocity calculations were with the velocriaptor wrapping of the scVelo python library.<sup>66</sup> From the  
405 anndata objects generated by our Snakemake pipeline we calculated velocity across all genes. Genes without  
406 detectable velocity were dropped. The scVI generated latent space (instead of PCA) was used to calculate first and  
407 second order moments. The calculated moments were used to estimate RNA velocity. Differential velocity was  
408 tested between celltypes using pairwise wilcox rank sum tests.

## 409 **Conclusion**

### 410 **Limitations**

411           The scVI model is first built the on human data. The mouse and macaque data are then projected (or  
412 queried) onto it with the scVI implementation of the scArches method. While this system works very well to  
413 integrate information between these three species, this approach may not scale to more distantly related species.  
414 Another limitation is that discrepancies between cell type labels between different labs makes certain transitioning  
415 cell type labels a bit imprecise. One example is how the rods and photoreceptor precursor labels partially overlap.  
416 Though we attempted to ameliorate the issue by removing cell type labels in large disagreement with the consensus,  
417 some disagreements could propagate into our machine labeled cells type assignments. These issues may reflect  
418 labeling continuous processes with discrete labels.

419           While scEiaD distinguishes the major cell types very well, some of the cell types contain many “sub types”  
420 - notably the amacrine cells have a huge variety in morphology with a single cell based study identifying over sixty  
421 different types of amacrine cells in mouse.<sup>29</sup> At this time our batch corrected pan retina cell space does not precisely  
422 resolve these sub cell types with high resolution. We are actively working to “sub cluster” the cell types so we can  
423 robustly and reliably identify the high diversity of retinal cell types across the entire retina.

### 424 **The scEiaD is a unique ocular resource that provides a highly diverse, large N dataset with** 425 **a relatively small amount of compute power**

426           We have assembled the largest ocular single cell transcriptome database to date. The rapid of advancement  
427 of algorithms to batch correct and process data continue to reduce the computational requirements to handle huge  
428 numbers of cells. The scVI batch correction step with around one million cells runs within an hour on a GPU and  
429 150GB of memory. This places this crucial step within the capabilities of a moderately powerful computer or a cloud  
430 compute node. Further downstream processing can largely be done a computers with 64+ GB of memory and a few  
431 hundred GB of disk space. We believe that our efforts can be replicated in any other tissue / system with a large  
432 number of independent studies by a small number of computational scientists following our general approach. We  
433 provide the completed analysis as both Scanpy (h5ad) and Seurat objects (Supplemental Table 5).

434 **Benchmarking and quantitation of integration performance is crucial for meta-atlas**  
435 **studies**

436 We originally intended to use the Seurat CCA method to integrate the datasets. However, the long run-times  
437 of CCA and poor integration of our known cell types led us to benchmark more methods and parameters. After  
438 adding more integration methods we first attempted “hand-assess” the integration results by using the UMAP 2D  
439 projection view. This proved to scale poorly and this led us to curate some of the more useful benchmarking  
440 algorithms (NMI, ARI, silhouette, and LISI) that roughly matched our “hand-assessed” results into the scPOP R  
441 package. While we chose the scVI algorithm, we strongly suggest any other groups attempting a similar meta-atlas  
442 construction chose a quantifiable set of criteria so optimal methods and parameters can be picked. We found in our  
443 analysis that substantial differences in the integration performance can come from altering the number of HVGs and  
444 the number of latent dimensions.

445 **Transfer of cell type labels from a smaller number of studies onto the remaining cells is a**  
446 **powerful way to increase diversity in a meta-atlas**

447 We first hand curated over 350,000 published cell type labels across 24 publications. With a xgboost  
448 algorithm using the latent dimensions, cell age classification (developing or matured), and the UMAP coordinates,  
449 we can very accurately label the remaining cells. Many other cell type labeling algorithms and systems exist for  
450 those groups less willing or able to tune a machine learning algorithm. For example, the developers of scVI also  
451 have a cell type label projection algorithm called scANVI.<sup>67</sup> Whichever approach you use, taking a smaller number  
452 of high quality labels and projecting them onto the remaining cells is a powerful way to leverage community  
453 knowledge across a huge diverse dataset.

454 **Projection allows community knowledge to be leveraged by all**

455 Many retina atlases have been published to date. We argue that we have created the first atlas that is  
456 generally useful because 1. our dataset/atlas is several times larger than any other published set, 2. our data is  
457 available via download in several forms at <https://github.com/davemcg/scEiaD> and Zenodo accession 5129265, and  
458 crucially 3. we provide a Google colab/Jupyter notebook which step-by-step demonstrates out how to use scVI to  
459 project (or query) outside data onto our scEiaD with minimum compute resources. We demonstrate concretely how  
460 this can work by showing how iPSC-based RPE can be queried onto the reference dataset to demonstrate both  
461 similarities and dissimilarities in their transcriptomes.

## 462 Supplemental Information

### 463 Tables

| CellType               | HS Published | MF Published | MM Published | HS Transferred | MF Transferred | MM Transferred |
|------------------------|--------------|--------------|--------------|----------------|----------------|----------------|
| AC/HC Precursors       | 1,450        | 0            | 0            | 2,779          | 2              | 291            |
| Amacrine Cells         | 13,430       | 19,246       | 35,837       | 21,179         | 36,308         | 53,958         |
| Artery                 | 167          | 0            | 0            | 0              | 0              | 0              |
| Astrocytes             | 1,102        | 0            | 39           | 1,699          | 64             | 326            |
| B-Cell                 | 509          | 0            | 8,109        | 336            | 27             | 76             |
| Bipolar Cells          | 5,012        | 7,617        | 15,536       | 9,855          | 14,342         | 32,573         |
| Choriocapillaris       | 225          | 0            | 0            | 0              | 0              | 0              |
| Cones                  | 3,242        | 694          | 4,705        | 6,844          | 1,107          | 18,509         |
| Endothelial            | 420          | 295          | 3,678        | 1,048          | 370            | 3,926          |
| Fibroblasts            | 1,632        | 0            | 221          | 2,037          | 16             | 3,477          |
| Horizontal Cells       | 5,282        | 163          | 1,719        | 9,033          | 259            | 8,501          |
| Macrophage             | 559          | 0            | 0            | 586            | 0              | 91             |
| Mast                   | 101          | 0            | 0            | 216            | 0              | 177            |
| Melanocytes            | 259          | 0            | 0            | 323            | 1              | 3              |
| Microglia              | 425          | 154          | 25           | 829            | 206            | 978            |
| Monocyte               | 311          | 0            | 25           | 369            | 0              | 454            |
| Muller Glia            | 19,303       | 13,763       | 4,368        | 26,508         | 25,025         | 9,325          |
| Natural Killer         | 168          | 0            | 0            | 221            | 0              | 4              |
| Neurogenic Cells       | 2,166        | 0            | 8,314        | 5,255          | 12             | 28,811         |
| Pericytes              | 457          | 2,459        | 20           | 583            | 3,703          | 1,228          |
| PR Precursors          | 2,009        | 0            | 5,122        | 6,540          | 1              | 16,107         |
| Red Blood Cells        | 63           | 0            | 1,737        | 706            | 6              | 1,842          |
| Retinal Ganglion Cells | 6,663        | 9,762        | 27,887       | 10,308         | 12,495         | 41,112         |
| Rod Bipolar Cells      | 392          | 0            | 9,837        | 600            | 0              | 11,838         |
| Rods                   | 31,292       | 1,481        | 22,887       | 69,339         | 14,004         | 58,129         |
| RPCs                   | 17,701       | 0            | 0            | 35,696         | 191            | 5,403          |
| RPE                    | 369          | 0            | 0            | 573            | 27             | 1,501          |
| Schwann                | 288          | 0            | 0            | 501            | 5              | 284            |
| Smooth Muscle Cell     | 45           | 0            | 0            | 0              | 0              | 0              |
| T-Cell                 | 1,075        | 0            | 4,335        | 1,238          | 24             | 49             |
| Unlabelled             | 101,950      | 53,641       | 235,058      | 1,119          | 1,074          | 6,144          |
| Vein                   | 490          | 0            | 0            | 1,021          | 0              | 37             |
| Early RPCs             | 0            | 0            | 27,962       | 898            | 6              | 35,080         |
| Late RPCs              | 0            | 0            | 21,362       | 318            | 0              | 34,444         |

464 *Supplemental Table 1: Counts for cell type labels. Published are the author created labels from the*  
 465 *published datasets. Transferred are the cell labels that were transferred by our xgboost-based machine learning*  
 466 *model onto the entire scEiaD dataset.*

| AUC  | Cell Type      | Study           |
|------|----------------|-----------------|
| 0.76 | AC/HC_Precurs  | All             |
| 0.71 | AC/HC_Precurs  | SRP151023       |
| 0.83 | AC/HC_Precurs  | SRP223254       |
| 0.99 | Amacrine Cells | All             |
| 0.20 | Amacrine Cells | E-MTAB-7316     |
| 1.00 | Amacrine Cells | EGAD00001006350 |
| 0.97 | Amacrine Cells | SRP050054       |
| 0.98 | Amacrine Cells | SRP075719       |
| 0.98 | Amacrine Cells | SRP151023       |
| 0.93 | Amacrine Cells | SRP158081       |
| 1.00 | Amacrine Cells | SRP158528       |
| 1.00 | Amacrine Cells | SRP194595       |
| 1.00 | Amacrine Cells | SRP200499       |
| 0.72 | Amacrine Cells | SRP222001       |
| 1.00 | Amacrine Cells | SRP222958       |
| 0.98 | Amacrine Cells | SRP223254       |
| 1.00 | Amacrine Cells | SRP255195       |
| 0.97 | Astrocytes     | All             |

| AUC  | Cell Type        | Study           |
|------|------------------|-----------------|
| 1.00 | Astrocytes       | E-MTAB-7316     |
| 0.97 | Astrocytes       | EGAD00001006350 |
| 0.94 | Astrocytes       | SRP050054       |
| 0.94 | Astrocytes       | SRP200499       |
| 1.00 | Astrocytes       | SRP255195       |
| 0.97 | B Cell           | All             |
| 0.81 | B Cell           | EGAD00001006350 |
| 1.00 | B Cell           | SRP131661       |
| 0.41 | B Cell           | SRP218652       |
| 0.91 | B Cell           | SRP257883       |
| 0.98 | Bipolar Cells    | All             |
| 1.00 | Bipolar Cells    | E-MTAB-7316     |
| 1.00 | Bipolar Cells    | EGAD00001006350 |
| 0.97 | Bipolar Cells    | SRP050054       |
| 0.99 | Bipolar Cells    | SRP075719       |
| 0.97 | Bipolar Cells    | SRP151023       |
| 0.94 | Bipolar Cells    | SRP158081       |
| 1.00 | Bipolar Cells    | SRP158528       |
| 1.00 | Bipolar Cells    | SRP194595       |
| 1.00 | Bipolar Cells    | SRP222001       |
| 1.00 | Bipolar Cells    | SRP222958       |
| 0.98 | Bipolar Cells    | SRP223254       |
| 1.00 | Bipolar Cells    | SRP255195       |
| 0.94 | Cones            | All             |
| 1.00 | Cones            | E-MTAB-7316     |
| 1.00 | Cones            | EGAD00001006350 |
| 0.96 | Cones            | SRP050054       |
| 0.71 | Cones            | SRP151023       |
| 0.88 | Cones            | SRP158081       |
| 0.97 | Cones            | SRP158528       |
| 1.00 | Cones            | SRP194595       |
| 1.00 | Cones            | SRP200499       |
| 1.00 | Cones            | SRP222001       |
| 0.47 | Cones            | SRP222958       |
| 0.97 | Cones            | SRP223254       |
| 0.90 | Cones            | SRP255195       |
| 0.98 | Early RPCs       | All             |
| 0.99 | Early RPCs       | SRP158081       |
| 0.97 | Endothelial      | All             |
| 0.98 | Endothelial      | EGAD00001006350 |
| 0.99 | Endothelial      | SRP050054       |
| 1.00 | Endothelial      | SRP131661       |
| 0.94 | Endothelial      | SRP158528       |
| 1.00 | Endothelial      | SRP194595       |
| 0.96 | Endothelial      | SRP200499       |
| 0.00 | Endothelial      | SRP218652       |
| 1.00 | Endothelial      | SRP222958       |
| 0.59 | Endothelial      | SRP255195       |
| 0.97 | Fibroblasts      | All             |
| 1.00 | Fibroblasts      | EGAD00001006350 |
| 0.95 | Fibroblasts      | SRP050054       |
| 0.99 | Fibroblasts      | SRP131661       |
| 0.53 | Fibroblasts      | SRP218652       |
| 0.99 | Fibroblasts      | SRP257883       |
| 0.96 | Horizontal Cells | All             |
| 1.00 | Horizontal Cells | E-MTAB-7316     |
| 1.00 | Horizontal Cells | EGAD00001006350 |
| 0.97 | Horizontal Cells | SRP050054       |
| 0.99 | Horizontal Cells | SRP151023       |
| 0.79 | Horizontal Cells | SRP158081       |
| 0.92 | Horizontal Cells | SRP158528       |
| 0.95 | Horizontal Cells | SRP200499       |
| 1.00 | Horizontal Cells | SRP222001       |
| 1.00 | Horizontal Cells | SRP222958       |
| 0.98 | Horizontal Cells | SRP223254       |
| 1.00 | Horizontal Cells | SRP255195       |
| 0.97 | Late RPCs        | All             |

| AUC  | Cell Type                | Study           |
|------|--------------------------|-----------------|
| 0.97 | Late RPCs                | SRP158081       |
| 0.70 | Macrophage               | All             |
| 0.58 | Macrophage               | SRP218652       |
| 0.97 | Macrophage               | SRP257883       |
| 0.83 | Mast                     | All             |
| 0.92 | Mast                     | EGAD00001006350 |
| 0.96 | Mast                     | SRP218652       |
| 0.97 | Melanocytes              | All             |
| 1.00 | Melanocytes              | EGAD00001006350 |
| 0.00 | Melanocytes              | SRP218652       |
| 0.98 | Melanocytes              | SRP257883       |
| 0.96 | Microglia                | All             |
| 0.95 | Microglia                | E-MTAB-7316     |
| 1.00 | Microglia                | EGAD00001006350 |
| 0.96 | Microglia                | SRP050054       |
| 0.96 | Microglia                | SRP158528       |
| 1.00 | Microglia                | SRP194595       |
| 0.79 | Microglia                | SRP200499       |
| 1.00 | Microglia                | SRP222001       |
| 0.90 | Microglia                | SRP222958       |
| 1.00 | Microglia                | SRP255195       |
| 0.97 | Monocyte                 | All             |
| 0.99 | Monocyte                 | EGAD00001006350 |
| 0.99 | Monocyte                 | SRP200499       |
| 0.99 | Muller Glia              | All             |
| 1.00 | Muller Glia              | E-MTAB-7316     |
| 1.00 | Muller Glia              | EGAD00001006350 |
| 1.00 | Muller Glia              | SRP050054       |
| 1.00 | Muller Glia              | SRP075719       |
| 0.80 | Muller Glia              | SRP151023       |
| 0.74 | Muller Glia              | SRP158081       |
| 1.00 | Muller Glia              | SRP158528       |
| 1.00 | Muller Glia              | SRP194595       |
| 1.00 | Muller Glia              | SRP200499       |
| 1.00 | Muller Glia              | SRP222001       |
| 0.99 | Muller Glia              | SRP222958       |
| 0.99 | Muller Glia              | SRP223254       |
| 1.00 | Muller Glia              | SRP255195       |
| 0.89 | Natural Killer           | All             |
| 0.97 | Natural Killer           | EGAD00001006350 |
| 0.81 | Neurogenic Cells         | All             |
| 0.76 | Neurogenic Cells         | SRP151023       |
| 0.85 | Neurogenic Cells         | SRP158081       |
| 0.63 | Neurogenic Cells         | SRP223254       |
| 0.95 | Pericytes                | All             |
| 0.97 | Pericytes                | EGAD00001006350 |
| 0.98 | Pericytes                | SRP158528       |
| 0.14 | Pericytes                | SRP218652       |
| 0.98 | Pericytes                | SRP257883       |
| 0.69 | Photoreceptor Precursors | All             |
| 0.48 | Photoreceptor Precursors | SRP151023       |
| 0.91 | Photoreceptor Precursors | SRP158081       |
| 0.40 | Photoreceptor Precursors | SRP223254       |
| 0.98 | Red Blood Cells          | All             |
| 1.00 | Red Blood Cells          | SRP131661       |
| 0.96 | Red Blood Cells          | SRP158081       |
| 0.78 | Red Blood Cells          | SRP257883       |
| 0.99 | Retinal Ganglion Cells   | All             |
| 0.10 | Retinal Ganglion Cells   | E-MTAB-7316     |
| 1.00 | Retinal Ganglion Cells   | EGAD00001006350 |
| 1.00 | Retinal Ganglion Cells   | SRP050054       |
| 0.98 | Retinal Ganglion Cells   | SRP151023       |
| 0.93 | Retinal Ganglion Cells   | SRP158081       |
| 1.00 | Retinal Ganglion Cells   | SRP158528       |
| 0.94 | Retinal Ganglion Cells   | SRP200499       |
| 1.00 | Retinal Ganglion Cells   | SRP222958       |
| 0.98 | Retinal Ganglion Cells   | SRP223254       |



| AUC  | Cell Type              | Study           |
|------|------------------------|-----------------|
| 1.00 | Retinal Ganglion Cells | SRP255195       |
| 0.99 | Rod Bipolar Cells      | All             |
| 1.00 | Rod Bipolar Cells      | EGAD00001006350 |
| 1.00 | Rod Bipolar Cells      | SRP075719       |
| 0.99 | Rod Bipolar Cells      | SRP200499       |
| 0.99 | Rods                   | All             |
| 1.00 | Rods                   | E-MTAB-7316     |
| 1.00 | Rods                   | EGAD00001006350 |
| 0.97 | Rods                   | SRP050054       |
| 0.96 | Rods                   | SRP151023       |
| 0.97 | Rods                   | SRP158081       |
| 0.96 | Rods                   | SRP158528       |
| 1.00 | Rods                   | SRP194595       |
| 1.00 | Rods                   | SRP200499       |
| 1.00 | Rods                   | SRP222001       |
| 1.00 | Rods                   | SRP222958       |
| 0.97 | Rods                   | SRP223254       |
| 0.96 | Rods                   | SRP255195       |
| 0.98 | RPCs                   | All             |
| 0.99 | RPCs                   | SRP151023       |
| 0.99 | RPCs                   | SRP223254       |
| 0.94 | RPE                    | All             |
| 1.00 | RPE                    | EGAD00001006350 |
| 0.81 | Schwann                | All             |
| 0.38 | Schwann                | SRP218652       |
| 1.00 | Schwann                | SRP257883       |
| 0.97 | T Cell                 | All             |
| 0.98 | T Cell                 | EGAD00001006350 |
| 0.99 | T Cell                 | SRP131661       |
| 0.05 | T Cell                 | SRP218652       |
| 0.99 | T Cell                 | SRP257883       |
| 0.91 | Vein                   | All             |
| 1.00 | Vein                   | SRP257883       |

467 *Supplemental Table 2: Area under the precision recall curve (AUC) for each cell type, split by study. The*

468 *“All” study is the AUC score across all cells within the cell type*

| CellType         | CellType_predict | Count  | Ratio |
|------------------|------------------|--------|-------|
| AC/HC Precursors | AC/HC Precursors | 1,248  | 0.86  |
| AC/HC Precursors | Neurogenic Cells | 100    | 0.07  |
| AC/HC Precursors | Horizontal Cells | 64     | 0.04  |
| Amacrine Cells   | Amacrine Cells   | 65,815 | 0.96  |
| Artery           | Endothelial      | 129    | 0.79  |
| Artery           | Vein             | 32     | 0.20  |
| Astrocytes       | Astrocytes       | 1,103  | 0.97  |
| B-Cell           | Endothelial      | 235    | 0.48  |
| B-Cell           | B-Cell           | 119    | 0.24  |
| B-Cell           | Vein             | 65     | 0.13  |
| B-Cell           | Fibroblasts      | 54     | 0.11  |
| B-Cell           | Macrophage       | 14     | 0.03  |
| Bipolar Cells    | Bipolar Cells    | 27,417 | 0.97  |
| Choriocapillaris | Vein             | 140    | 0.64  |
| Choriocapillaris | Endothelial      | 78     | 0.36  |
| Cones            | Cones            | 7,771  | 0.90  |
| Cones            | Rods             | 452    | 0.05  |
| Cones            | PR Precursors    | 265    | 0.03  |
| Early RPCs       | Early RPCs       | 26,654 | 0.96  |
| Early RPCs       | Neurogenic Cells | 607    | 0.02  |
| Endothelial      | Endothelial      | 781    | 0.84  |
| Endothelial      | Pericytes        | 94     | 0.10  |
| Endothelial      | Vein             | 27     | 0.03  |
| Fibroblasts      | Fibroblasts      | 1,585  | 0.96  |
| Fibroblasts      | Vein             | 48     | 0.03  |

| CellType               | CellType_predict       | Count  | Ratio |
|------------------------|------------------------|--------|-------|
| Horizontal Cells       | Horizontal Cells       | 6,902  | 0.96  |
| Late RPCs              | Late RPCs              | 20,162 | 0.95  |
| Late RPCs              | Early RPCs             | 496    | 0.02  |
| Late RPCs              | Neurogenic Cells       | 458    | 0.02  |
| Macrophage             | Macrophage             | 443    | 0.80  |
| Macrophage             | T-Cell                 | 83     | 0.15  |
| Macrophage             | Mast                   | 14     | 0.03  |
| Mast                   | Mast                   | 90     | 0.92  |
| Mast                   | RPCs                   | 3      | 0.03  |
| Melanocytes            | Melanocytes            | 252    | 0.97  |
| Microglia              | Microglia              | 560    | 0.94  |
| Monocyte               | Monocyte               | 316    | 0.95  |
| Monocyte               | Microglia              | 7      | 0.02  |
| Muller Glia            | Muller Glia            | 36,671 | 0.98  |
| Natural Killer         | Natural Killer         | 150    | 0.90  |
| Natural Killer         | T-Cell                 | 11     | 0.07  |
| Natural Killer         | B-Cell                 | 4      | 0.02  |
| Neurogenic Cells       | Neurogenic Cells       | 9,061  | 0.87  |
| Neurogenic Cells       | RPCs                   | 392    | 0.04  |
| Neurogenic Cells       | Late RPCs              | 339    | 0.03  |
| Neurogenic Cells       | Early RPCs             | 225    | 0.02  |
| Neurogenic Cells       | PR Precursors          | 223    | 0.02  |
| Pericytes              | Pericytes              | 2,771  | 0.95  |
| Pericytes              | Vein                   | 96     | 0.03  |
| PR Precursors          | PR Precursors          | 6,377  | 0.90  |
| PR Precursors          | Cones                  | 254    | 0.04  |
| PR Precursors          | Neurogenic Cells       | 230    | 0.03  |
| PR Precursors          | Rods                   | 147    | 0.02  |
| Red Blood Cells        | Red Blood Cells        | 673    | 0.97  |
| Retinal Ganglion Cells | Retinal Ganglion Cells | 42,766 | 0.97  |
| Rod Bipolar Cells      | Rod Bipolar Cells      | 9,634  | 0.94  |
| Rod Bipolar Cells      | Bipolar Cells          | 589    | 0.06  |
| Rods                   | Rods                   | 53,731 | 0.97  |
| Rods                   | PR Precursors          | 1,477  | 0.03  |
| RPCs                   | RPCs                   | 17,135 | 0.97  |
| RPE                    | RPE                    | 343    | 0.93  |
| RPE                    | RPCs                   | 13     | 0.04  |
| Schwann                | Schwann                | 220    | 0.77  |
| Schwann                | Fibroblasts            | 28     | 0.10  |
| Schwann                | Melanocytes            | 16     | 0.06  |
| Schwann                | Pericytes              | 12     | 0.04  |
| Smooth Muscle Cell     | Pericytes              | 38     | 0.84  |
| Smooth Muscle Cell     | Endothelial            | 7      | 0.16  |
| T-Cell                 | T-Cell                 | 923    | 0.86  |
| T-Cell                 | Macrophage             | 91     | 0.09  |
| T-Cell                 | Natural Killer         | 29     | 0.03  |
| Vein                   | Vein                   | 481    | 0.98  |

469 *Supplemental Table 3: Counts of cell type labels with our xgboost machine learning system (PredCellType)*  
470 *and the published cell type labels (TrueCellType). Ratio is calculated as CellType that were labeled as*  
471 *CellType\_predict. Ratio < 0.05 were filtered out from view in the table.*

| CellType         | HS Studies (published) | MF Studies (published) | MM Studies (published) | HS Studies (transferred) | MF Studies (transferred) | MM Studies (transferred) |
|------------------|------------------------|------------------------|------------------------|--------------------------|--------------------------|--------------------------|
| AC/HC Precursors | 2                      | 0                      | 0                      | 4                        | 1                        | 3                        |
| Amacrine Cells   | 8                      | 1                      | 5                      | 11                       | 1                        | 15                       |

| CellType               | HS Studies (published) | MF Studies (published) | MM Studies (published) | HS Studies (transferred) | MF Studies (transferred) | MM Studies (transferred) |
|------------------------|------------------------|------------------------|------------------------|--------------------------|--------------------------|--------------------------|
| Artery                 | 1                      | 0                      | 0                      | 0                        | 0                        | 0                        |
| Astrocytes             | 3                      | 0                      | 2                      | 10                       | 1                        | 7                        |
| B-Cell                 | 3                      | 0                      | 1                      | 8                        | 1                        | 8                        |
| Bipolar Cells          | 8                      | 1                      | 4                      | 11                       | 1                        | 14                       |
| Choriocapillaris       | 1                      | 0                      | 0                      | 0                        | 0                        | 0                        |
| Cones                  | 8                      | 1                      | 3                      | 11                       | 1                        | 16                       |
| Endothelial            | 6                      | 1                      | 3                      | 11                       | 1                        | 10                       |
| Fibroblasts            | 3                      | 0                      | 2                      | 9                        | 1                        | 11                       |
| Horizontal Cells       | 7                      | 1                      | 3                      | 10                       | 1                        | 11                       |
| Macrophage             | 2                      | 0                      | 0                      | 8                        | 0                        | 4                        |
| Mast                   | 2                      | 0                      | 0                      | 9                        | 0                        | 3                        |
| Melanocytes            | 3                      | 0                      | 0                      | 7                        | 1                        | 2                        |
| Microglia              | 6                      | 1                      | 2                      | 13                       | 1                        | 10                       |
| Monocyte               | 1                      | 0                      | 1                      | 9                        | 0                        | 8                        |
| Muller Glia            | 8                      | 1                      | 4                      | 14                       | 1                        | 13                       |
| Natural Killer         | 1                      | 0                      | 0                      | 5                        | 0                        | 2                        |
| Neurogenic Cells       | 2                      | 0                      | 1                      | 5                        | 1                        | 7                        |
| Pericytes              | 3                      | 1                      | 1                      | 9                        | 1                        | 7                        |
| PR Precursors          | 2                      | 0                      | 1                      | 4                        | 1                        | 4                        |
| Red Blood Cells        | 1                      | 0                      | 2                      | 11                       | 1                        | 12                       |
| Retinal Ganglion Cells | 6                      | 1                      | 4                      | 11                       | 1                        | 16                       |
| Rod Bipolar Cells      | 1                      | 0                      | 2                      | 7                        | 0                        | 9                        |
| Rods                   | 8                      | 1                      | 3                      | 13                       | 1                        | 15                       |
| RPCs                   | 2                      | 0                      | 0                      | 10                       | 1                        | 10                       |
| RPE                    | 2                      | 0                      | 0                      | 7                        | 1                        | 7                        |

| CellType           | HS Studies (published) | MF Studies (published) | MM Studies (published) | HS Studies (transferred) | MF Studies (transferred) | MM Studies (transferred) |
|--------------------|------------------------|------------------------|------------------------|--------------------------|--------------------------|--------------------------|
| Schwann            | 2                      | 0                      | 0                      | 8                        | 1                        | 3                        |
| Smooth Muscle Cell | 1                      | 0                      | 0                      | 0                        | 0                        | 0                        |
| T-Cell             | 3                      | 0                      | 1                      | 7                        | 1                        | 7                        |
| Unlabelled         | 15                     | 1                      | 18                     | 11                       | 1                        | 16                       |
| Vein               | 1                      | 0                      | 0                      | 5                        | 0                        | 3                        |
| Early RPCs         | 0                      | 0                      | 1                      | 4                        | 1                        | 8                        |
| Late RPCs          | 0                      | 0                      | 1                      | 3                        | 0                        | 6                        |

472 *Supplemental Table 4: Counts for number of studies with cell types labels before and after cell type label*  
 473 *transfer*

| Resource or File                           | Link                                                                                                                                                                  | Accession |
|--------------------------------------------|-----------------------------------------------------------------------------------------------------------------------------------------------------------------------|-----------|
| Seurat Object                              | <a href="http://hpc.nih.gov/~mcgaugheyd/scEiaD/2021_03_17/scEiaD_all_seurat_v3.Rdata">http://hpc.nih.gov/~mcgaugheyd/scEiaD/2021_03_17/scEiaD_all_seurat_v3.Rdata</a> |           |
| Anndata Object                             | <a href="http://hpc.nih.gov/~mcgaugheyd/scEiaD/2021_03_17/scEiaD_all_anndata.h5ad">http://hpc.nih.gov/~mcgaugheyd/scEiaD/2021_03_17/scEiaD_all_anndata.h5ad</a>       |           |
| Counts, R sparse matrix                    | <a href="http://hpc.nih.gov/~mcgaugheyd/scEiaD/2021_03_17/counts.Rdata">http://hpc.nih.gov/~mcgaugheyd/scEiaD/2021_03_17/counts.Rdata</a>                             |           |
| Cell level metadata                        | <a href="http://hpc.nih.gov/~mcgaugheyd/scEiaD/2021_03_17/metadata_filter.tsv.gz">http://hpc.nih.gov/~mcgaugheyd/scEiaD/2021_03_17/metadata_filter.tsv.gz</a>         |           |
| Codebase for scEiaD creation               | <a href="https://github.com/davemcg/scEiaD">https://github.com/davemcg/scEiaD</a>                                                                                     | ffdf738   |
| Codebase for scEiaD manuscript             | <a href="https://github.com/davemcg/scEiaD_manuscript">https://github.com/davemcg/scEiaD_manuscript</a>                                                               |           |
| Zenodo deposit of all above files and code | <a href="https://zenodo.org/record/5129265">https://zenodo.org/record/5129265</a>                                                                                     | 5129265   |
| iPSC RPE scRNA Raw Fastq Files             | <a href="https://www.ncbi.nlm.nih.gov/geo/query/acc.cgi?acc=GSE180662">https://www.ncbi.nlm.nih.gov/geo/query/acc.cgi?acc=GSE180662</a>                               | GSE180662 |

474 *Supplemental Table 5: Links to code and resources*

475 **Figures**

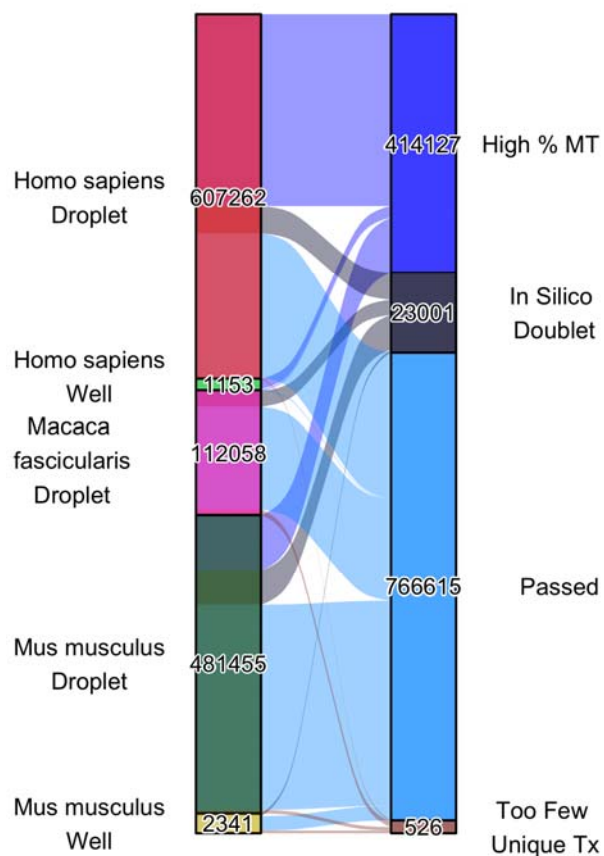

476

477 *Supplemental Figure 1: The left bar delineates the number of cells for each organism - technology combination. The*  
478 *right bar specifies the number of each cells in each post QC category. In silico doublets were identified with scrublet*  
479 *and DoubletDetector.*

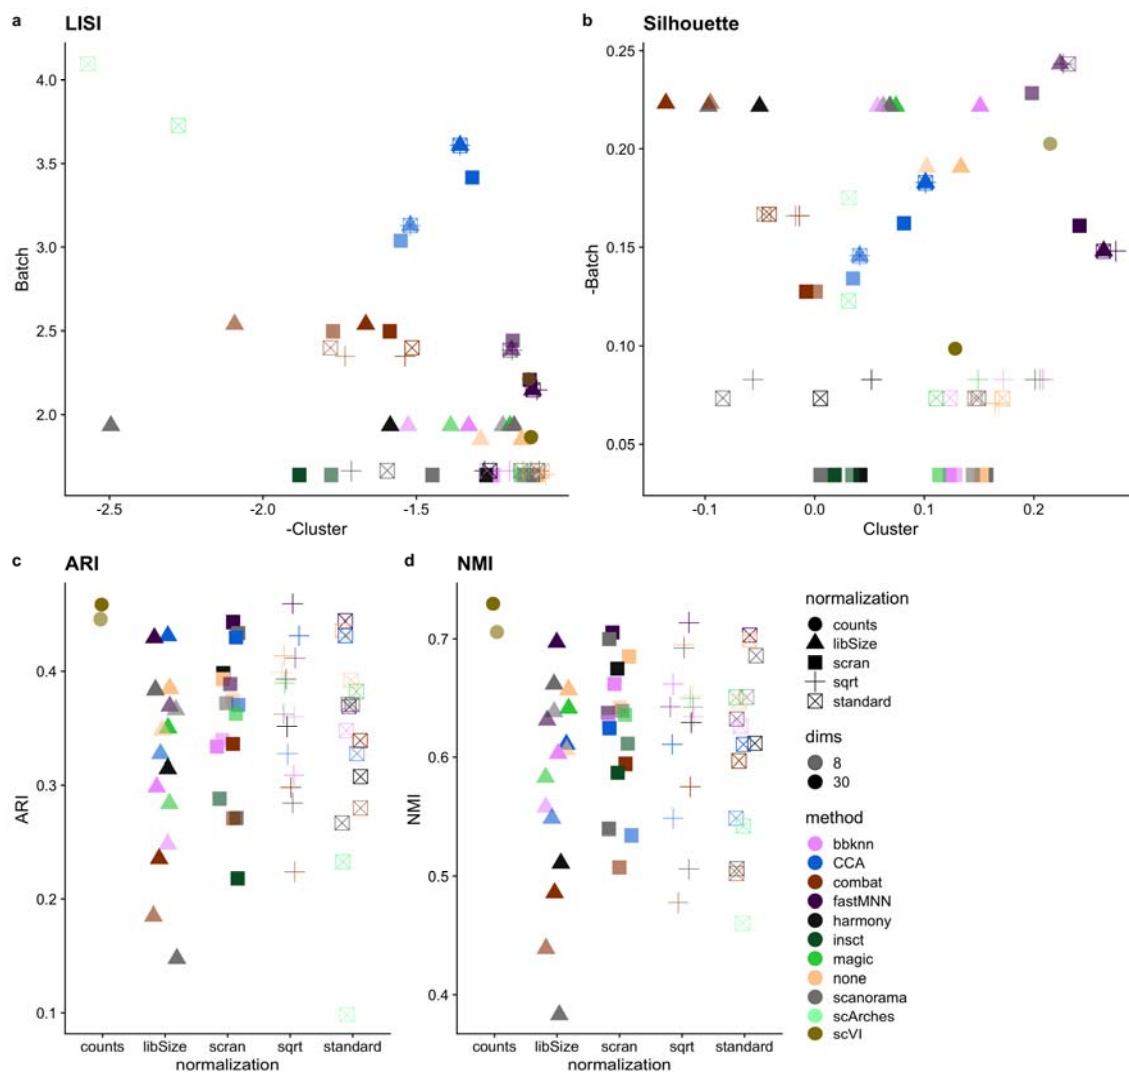

480

481 *Supplemental Figure 2: Performance of the various batch correction tools across various benchmarking metrics.*  
 482 *For the LISI and Silhouette plots in A, B higher (y-axis) means better batch mixing and further to the right (x-axis)*  
 483 *means better cluster purity. For the ARI and NMI metrics (which reflects how well cluster matches with cell type) in*  
 484 *C, D, higher means a better score.*

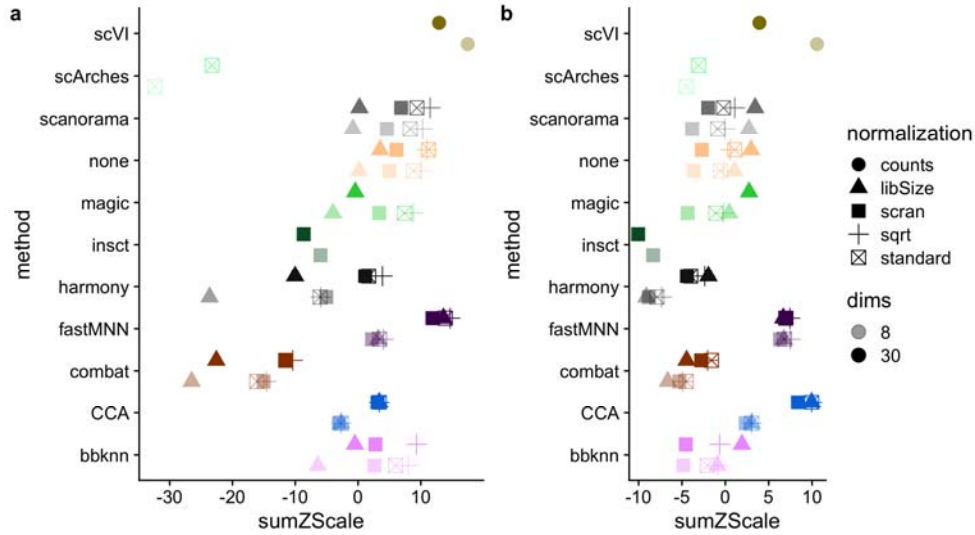

485

486 *Supplemental Figure 3: We take the sumZscoring from earlier, and apply two different weighting schemes to*  
487 *demonstrate how different priorities (much higher cluster purity or much more cluster mixing) can influence the*  
488 *scoring. In A we give a 3x multiplier to cell and cluster purity relative to batch mixing. In B we give a 3x multiplier to*  
489 *batch mixing and we see that fastMNN with 8 dims has a higher score and the Seurat CCA metric ranks better. scVI*  
490 *performance with 8 latent dimension is consistently high across all weighting schemes.*



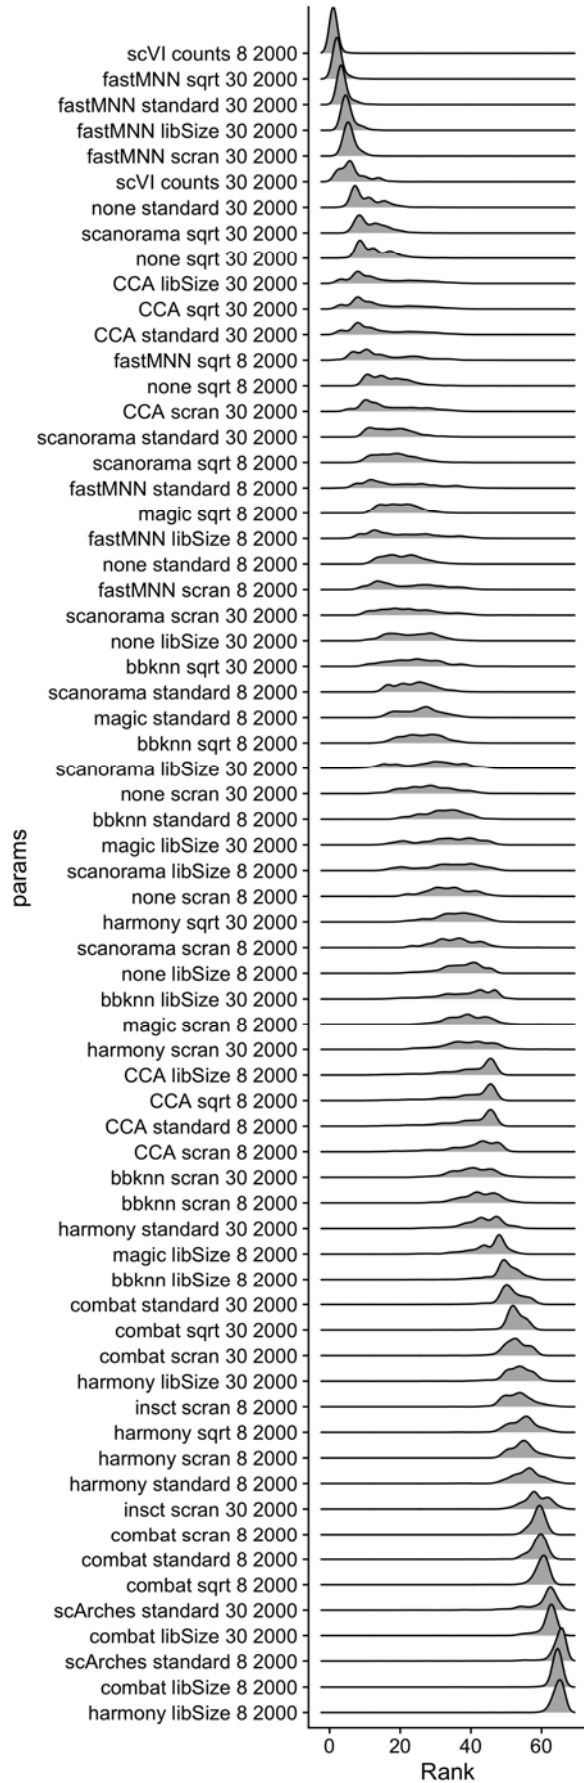

492 *Supplemental Figure 4: The sumZScale is composed of 10 metrics. We randomly weighed each zscaled metric by*  
 493 *multiplying by a value randomly chosen between 0.1 and 10. This is bootstrapped 1000 times. The sumZScale is*  
 494 *then computed and we extract the rank (by highest sumZScale) for 1000 bootstraps and plot the distribution as a*  
 495 *density plot (lower rank is better integration performance). The y axis is ordered, top to bottom, by mean sumZScale*  
 496 *Rank (higher on the y axis is better).*

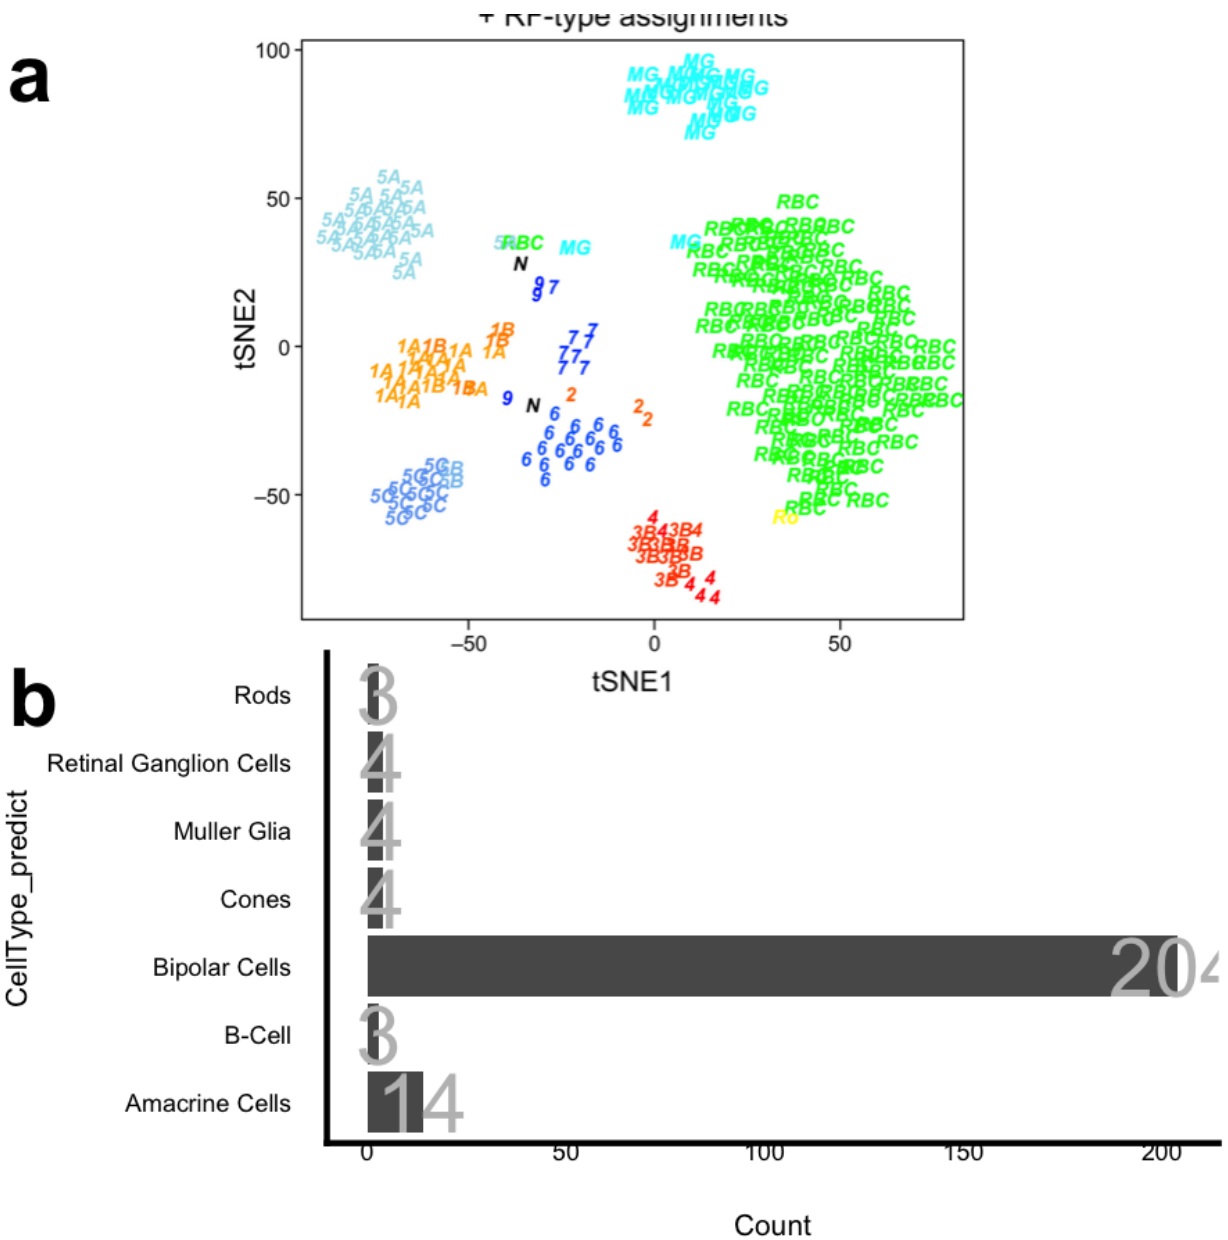

497

498 *Supplemental Figure 5: Our xgboost ML properly labels this Shekhar et al. RBC FAC sorted population as enriched*  
 499 *in RBC*

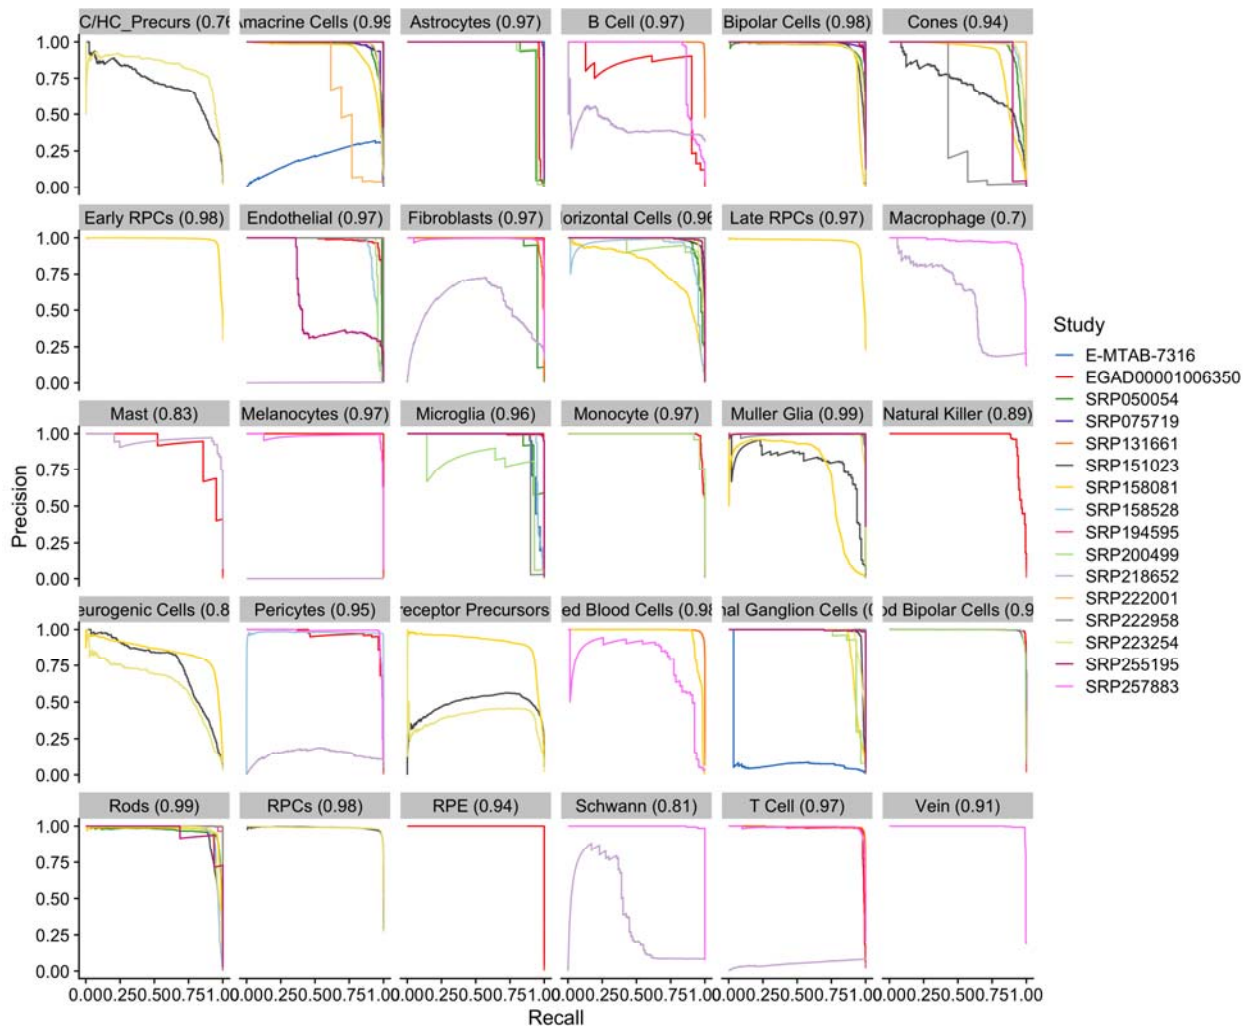

500

501 *Supplemental Figure 6: Precision recall curves for our xgboost cell type predictor model across each cell type*  
 502 *predicted*

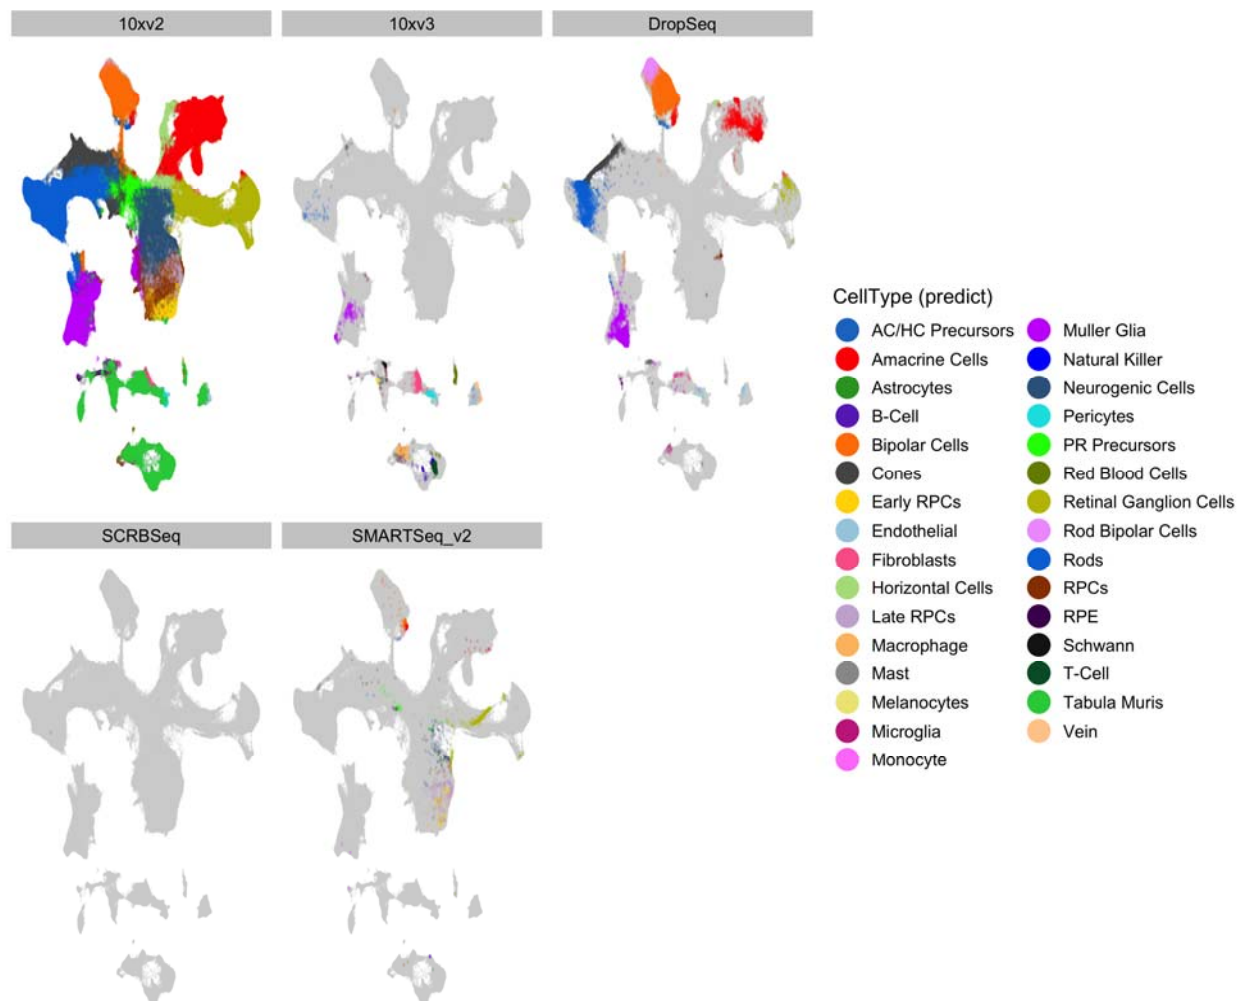

503

504 *Supplemental Figure 7: Distribution of cell types across the 2D UMAP confirms that the cell types are being*  
505 *properly placed despite the wide variety of single sequencing platforms present.*

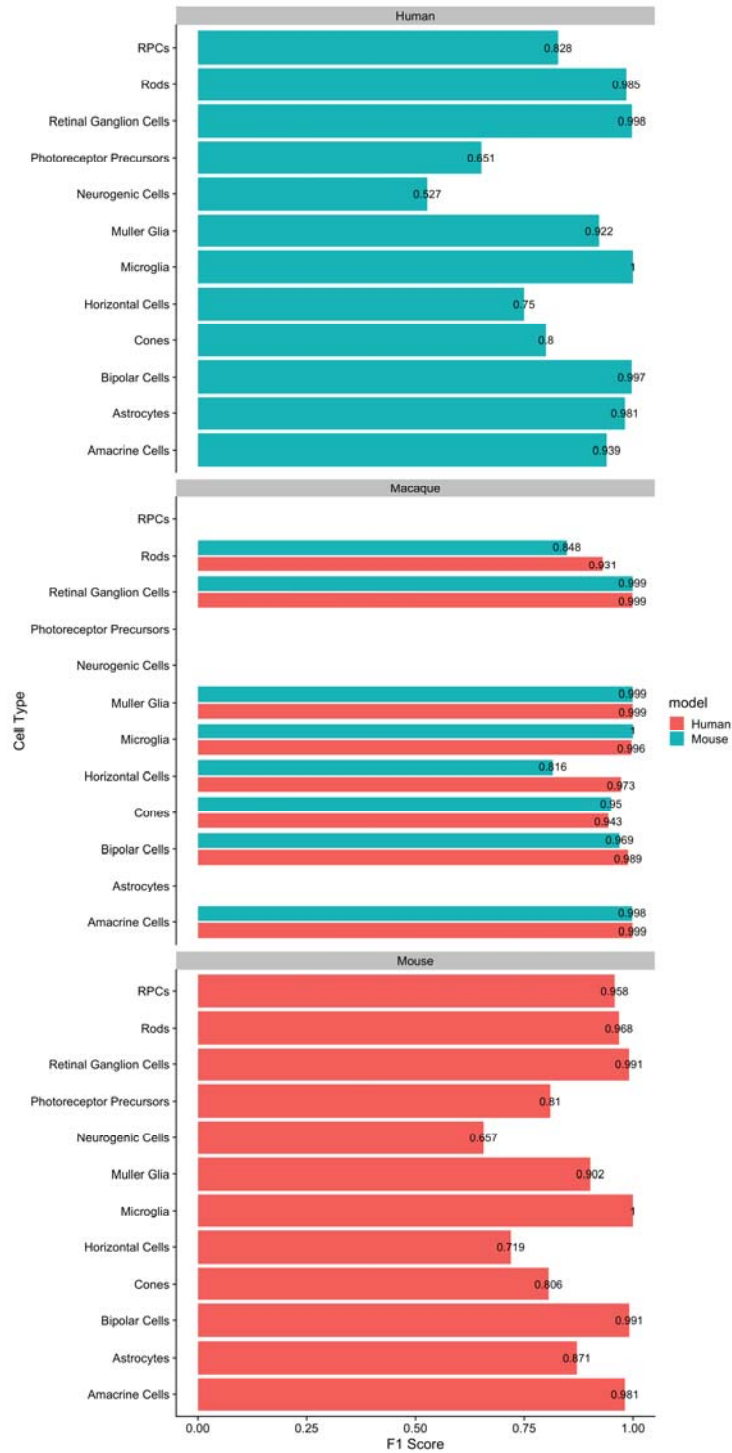

506

507 *Supplemental Figure 8: F1 scores (1 is perfect) of cell type prediction when using a human or mouse based xgboost*  
 508 *cell type prediction model on other organisms (human, macaque, mouse).*

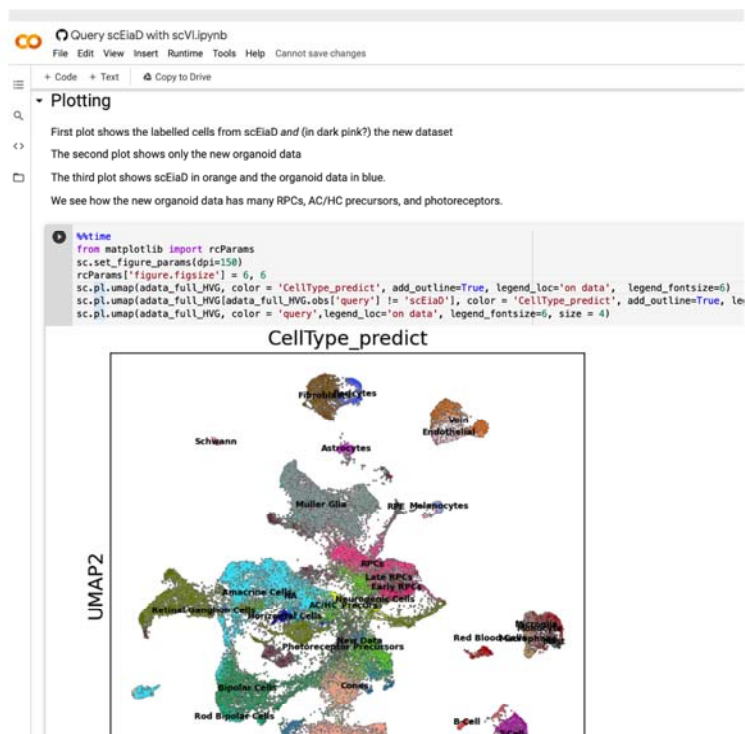

509

510 *Supplemental Figure 9: Screen shot of Google colab notebook that demonstrates how to integrate external data into*  
511 *the scEiaD resource. We see in the screenshot how the organoid dataset contains many of the retinal cell types.*

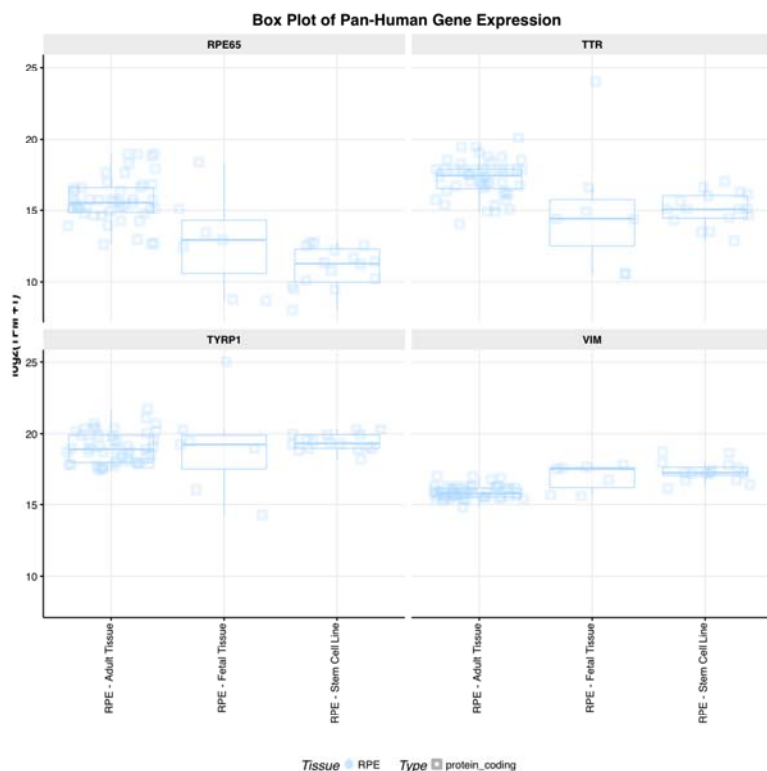

512

513 *Supplemental Figure 10: Screenshot of eyeIntegration bulk RNA-seq meta-analysis of vimentin expression in*  
514 *different RPE tissue sources*

## 515 Acknowledgments

516 We would like to thank the many groups who provided the raw data required to create this project. We  
517 keep a updated list of citations for the projects we pulled data from at <https://plae.nei.nih.gov>. We would also like to  
518 thank Adam Gayoso, who provided many useful comments on scVI parameter behavior and the Google colab  
519 implementation of scVI. Finally, this work utilized the computational resources of the NIH HPC Biowulf cluster  
520 (<http://hpc.nih.gov>).

## 521 Works Cited

522 1. Masland RH. The Neuronal Organization of the Retina. *Neuron*. 2012;76(2):266-280.  
523 doi:10.1016/j.neuron.2012.10.002



- 524 2. Annie M, Kröger S. Isoform Pattern and AChR Aggregation Activity of Agrin Expressed by Embryonic  
525 Chick Retinal Ganglion Neurons. *Molecular and Cellular Neuroscience*. 2002;20(3):525-535.  
526 doi:[10.1006/mcne.2002.1125](https://doi.org/10.1006/mcne.2002.1125)
- 527 3. Hagstrom SA, Neitz M, Neitz J. Cone pigment gene expression in individual photoreceptors and the  
528 chromatic topography of the retina. *J Opt Soc Am A Opt Image Sci Vis*. 2000;17(3):527-537.  
529 doi:[10.1364/josaa.17.000527](https://doi.org/10.1364/josaa.17.000527)
- 530 4. Trimarchi JM, Stadler MB, Roska B, et al. Molecular heterogeneity of developing retinal ganglion and  
531 amacrine cells revealed through single cell gene expression profiling. *Journal of Comparative Neurology*.  
532 2007;502(6):1047-1065. doi:[10.1002/cne.21368](https://doi.org/10.1002/cne.21368)
- 533 5. Wahlin KJ, Lim L, Grice EA, Campochiaro PA, Zack DJ, Adler R. A method for analysis of gene  
534 expression in isolated mouse photoreceptor and Müller cells. *Mol Vis*. 2004;10:366-375.
- 535 6. Svensson V, da Veiga Beltrame E, Pachter L. A curated database reveals trends in single-cell  
536 transcriptomics. *Database*. 2020;2020. doi:[10.1093/database/baaa073](https://doi.org/10.1093/database/baaa073)
- 537 7. Macosko EZ, Basu A, Satija R, et al. Highly Parallel Genome-wide Expression Profiling of Individual Cells  
538 Using Nanoliter Droplets. *Cell*. 2015;161(5):1202-1214. doi:[10.1016/j.cell.2015.05.002](https://doi.org/10.1016/j.cell.2015.05.002)
- 539 8. Buenaventura DF, Corseri A, Emerson MM. Identification of Genes With Enriched Expression in Early  
540 Developing Mouse Cone Photoreceptors. *Invest Ophthalmol Vis Sci*. 2019;60(8):2787-2799. doi:[10.1167/iovs.19-  
541 26951](https://doi.org/10.1167/iovs.19-26951)
- 542 9. Clark BS, Stein-O'Brien GL, Shiao F, et al. Single-Cell RNA-Seq Analysis of Retinal Development  
543 Identifies NFI Factors as Regulating Mitotic Exit and Late-Born Cell Specification. *Neuron*. Published online May  
544 22, 2019. doi:[10.1016/j.neuron.2019.04.010](https://doi.org/10.1016/j.neuron.2019.04.010)
- 545 10. Cowan CS, Renner M, De Gennaro M, et al. Cell Types of the Human Retina and Its Organoids at Single-  
546 Cell Resolution. *Cell*. 2020;182(6):1623-1640.e34. doi:[10.1016/j.cell.2020.08.013](https://doi.org/10.1016/j.cell.2020.08.013)

- 547 11. Dharmat R, Kim S, Liu H, Fu S, Li Y, Chen R. Epigenetic adaptation prolongs photoreceptor survival  
548 during retinal degeneration. *bioRxiv*. Published online September 18, 2019:774950. doi:[10.1101/774950](https://doi.org/10.1101/774950)
- 549 12. Fadl BR, Brodie SA, Malasky M, et al. An optimized protocol for retina single-cell RNA sequencing. *Mol*  
550 *Vis.* 2020;26:705-717. Accessed March 26, 2021. <https://www.ncbi.nlm.nih.gov/pmc/articles/PMC7553720/>
- 551 13. Hu Y, Wang X, Hu B, et al. Dissecting the transcriptome landscape of the human fetal neural retina and  
552 retinal pigment epithelium by single-cell RNA-seq analysis. *PLoS Biol.* 2019;17(7):e3000365.  
553 doi:[10.1371/journal.pbio.3000365](https://doi.org/10.1371/journal.pbio.3000365)
- 554 14. Lehmann GL, Hanke-Gogokhia C, Hu Y, et al. Single-cell profiling reveals an endothelium-mediated  
555 immunomodulatory pathway in the eye choroid. *Journal of Experimental Medicine.* 2020;217(e20190730).  
556 doi:[10.1084/jem.20190730](https://doi.org/10.1084/jem.20190730)
- 557 15. Lo Giudice Q, Leleu M, La Manno G, Fabre PJ. Single-cell transcriptional logic of cell-fate specification  
558 and axon guidance in early-born retinal neurons. *Development.* 2019;146(17). doi:[10.1242/dev.178103](https://doi.org/10.1242/dev.178103)
- 559 16. Lukowski SW, Lo CY, Sharov AA, et al. A single-cell transcriptome atlas of the adult human retina. *EMBO*  
560 *J.* 2019;38(18):e100811. doi:[10.15252/embj.2018100811](https://doi.org/10.15252/embj.2018100811)
- 561 17. Lu Y, Shiau F, Yi W, et al. Single-Cell Analysis of Human Retina Identifies Evolutionarily Conserved and  
562 Species-Specific Mechanisms Controlling Development. *Dev Cell.* 2020;53(4):473-491.e9.  
563 doi:[10.1016/j.devcel.2020.04.009](https://doi.org/10.1016/j.devcel.2020.04.009)
- 564 18. Menon M, Mohammadi S, Davila-Velderrain J, et al. Single-cell transcriptomic atlas of the human retina  
565 identifies cell types associated with age-related macular degeneration. *Nat Commun.* 2019;10(1):4902.  
566 doi:[10.1038/s41467-019-12780-8](https://doi.org/10.1038/s41467-019-12780-8)
- 567 19. O’Koren EG, Yu C, Klingeborn M, et al. Microglial Function Is Distinct in Different Anatomical Locations  
568 during Retinal Homeostasis and Degeneration. *Immunity.* 2019;50(3):723-737.e7.  
569 doi:[10.1016/j.immuni.2019.02.007](https://doi.org/10.1016/j.immuni.2019.02.007)

- 570 20. Peng Y-R, Shekhar K, Yan W, et al. Molecular Classification and Comparative Taxonomics of Foveal and  
571 Peripheral Cells in Primate Retina. *Cell*. 2019;176(5):1222-1237.e22. doi:[10.1016/j.cell.2019.01.004](https://doi.org/10.1016/j.cell.2019.01.004)
- 572 21. Shekhar K, Lapan SW, Whitney IE, et al. Comprehensive Classification of Retinal Bipolar Neurons by  
573 Single-Cell Transcriptomics. *Cell*. 2016;166(5):1308-1323.e30. doi:[10.1016/j.cell.2016.07.054](https://doi.org/10.1016/j.cell.2016.07.054)
- 574 22. Sridhar A, Hoshino A, Finkbeiner CR, et al. Single-Cell Transcriptomic Comparison of Human Fetal  
575 Retina, hPSC-Derived Retinal Organoids, and Long-Term Retinal Cultures. *Cell Rep*. 2020;30(5):1644-1659.e4.  
576 doi:[10.1016/j.celrep.2020.01.007](https://doi.org/10.1016/j.celrep.2020.01.007)
- 577 23. Tran NM, Shekhar K, Whitney IE, et al. Single-Cell Profiles of Retinal Ganglion Cells Differing in  
578 Resilience to Injury Reveal Neuroprotective Genes. *Neuron*. 2019;104(6):1039-1055.e12.  
579 doi:[10.1016/j.neuron.2019.11.006](https://doi.org/10.1016/j.neuron.2019.11.006)
- 580 24. Voigt AP, Whitmore SS, Mulfaul K, et al. Bulk and single-cell gene expression analyses reveal aging  
581 human choriocapillaris has pro-inflammatory phenotype. *Microvascular Research*. 2020;131:104031.  
582 doi:[10.1016/j.mvr.2020.104031](https://doi.org/10.1016/j.mvr.2020.104031)
- 583 25. Voigt AP, Whitmore SS, Flamme-Wiese MJ, et al. Molecular characterization of foveal versus peripheral  
584 human retina by single-cell RNA sequencing. *Experimental Eye Research*. 2019;184:234-242.  
585 doi:[10.1016/j.exer.2019.05.001](https://doi.org/10.1016/j.exer.2019.05.001)
- 586 26. Voigt AP, Binkley E, Flamme-Wiese MJ, et al. Single-Cell RNA Sequencing in Human Retinal  
587 Degeneration Reveals Distinct Glial Cell Populations. *Cells*. 2020;9(2). doi:[10.3390/cells9020438](https://doi.org/10.3390/cells9020438)
- 588 27. Voigt AP, Mulfaul K, Mullin NK, et al. Single-cell transcriptomics of the human retinal pigment epithelium  
589 and choroid in health and macular degeneration. *Proc Natl Acad Sci U S A*. 2019;116(48):24100-24107.  
590 doi:[10.1073/pnas.1914143116](https://doi.org/10.1073/pnas.1914143116)
- 591 28. Yan W, Peng Y-R, van Zyl T, et al. Cell Atlas of The Human Fovea and Peripheral Retina. *Sci Rep*.  
592 2020;10(1):9802. doi:[10.1038/s41598-020-66092-9](https://doi.org/10.1038/s41598-020-66092-9)

- 593 29. Yan W, Laboulaye MA, Tran NM, Whitney IE, Benhar I, Sanes JR. Mouse Retinal Cell Atlas: Molecular  
594 Identification of over Sixty Amacrine Cell Types. *J Neurosci.* 2020;40(27):5177-5195.  
595 doi:[10.1523/JNEUROSCI.0471-20.2020](https://doi.org/10.1523/JNEUROSCI.0471-20.2020)
- 596 30. Melsted P, Booeshaghi AS, Gao F, et al. Modular and efficient pre-processing of single-cell RNA-seq.  
597 *bioRxiv*. Published online July 26, 2019:673285. doi:[10.1101/673285](https://doi.org/10.1101/673285)
- 598 31. Srivastava A, Malik L, Smith T, Sudbery I, Patro R. Alevin efficiently estimates accurate gene abundances  
599 from dscRNA-seq data. *Genome Biology.* 2019;20(1):65. doi:[10.1186/s13059-019-1670-y](https://doi.org/10.1186/s13059-019-1670-y)
- 600 32. Butler A, Hoffman P, Smibert P, Papalexi E, Satija R. Integrating single-cell transcriptomic data across  
601 different conditions, technologies, and species. *Nature Biotechnology.* 2018;36(5, 5):411-420. doi:[10.1038/nbt.4096](https://doi.org/10.1038/nbt.4096)
- 602 33. Haghverdi L, Lun ATL, Morgan MD, Marioni JC. Batch effects in single-cell RNA-sequencing data are  
603 corrected by matching mutual nearest neighbors. *Nature Biotechnology.* 2018;36(5, 5):421-427.  
604 doi:[10.1038/nbt.4091](https://doi.org/10.1038/nbt.4091)
- 605 34. Hie B, Bryson B, Berger B. Efficient integration of heterogeneous single-cell transcriptomes using  
606 Scanorama. *Nature Biotechnology.* 2019;37(6, 6):685-691. doi:[10.1038/s41587-019-0113-3](https://doi.org/10.1038/s41587-019-0113-3)
- 607 35. Johnson WE, Li C, Rabinovic A. Adjusting batch effects in microarray expression data using empirical  
608 Bayes methods. *Biostatistics.* 2007;8(1):118-127. doi:[10.1093/biostatistics/kxj037](https://doi.org/10.1093/biostatistics/kxj037)
- 609 36. Korsunsky I, Millard N, Fan J, et al. Fast, sensitive and accurate integration of single-cell data with  
610 Harmony. *Nature Methods.* 2019;16(12, 12):1289-1296. doi:[10.1038/s41592-019-0619-0](https://doi.org/10.1038/s41592-019-0619-0)
- 611 37. Liu J, Gao C, Sodicoff J, Kozareva V, Macosko EZ, Welch JD. Jointly defining cell types from multiple  
612 single-cell datasets using LIGER. *Nature Protocols.* 2020;15(11, 11):3632-3662. doi:[10.1038/s41596-020-0391-8](https://doi.org/10.1038/s41596-020-0391-8)
- 613 38. Lopez R, Regier J, Cole MB, Jordan MI, Yosef N. Deep generative modeling for single-cell  
614 transcriptomics. *Nature Methods.* 2018;15(12, 12):1053-1058. doi:[10.1038/s41592-018-0229-2](https://doi.org/10.1038/s41592-018-0229-2)
- 615 39. Polański K, Young MD, Miao Z, Meyer KB, Teichmann SA, Park J-E. BBKNN: Fast batch alignment of  
616 single cell transcriptomes. *Bioinformatics.* 2020;36(3):964-965. doi:[10.1093/bioinformatics/btz625](https://doi.org/10.1093/bioinformatics/btz625)

- 617 40. Query to reference single-cell integration with transfer learning | bioRxiv. Accessed December 20, 2020.  
618 <https://www.biorxiv.org/content/10.1101/2020.07.16.205997v1>
- 619 41. Simon LM, Wang Y-Y, Zhao Z. INSCCT: Integrating millions of single cells using batch-aware triplet neural  
620 networks. *bioRxiv*. Published online May 17, 2020:2020.05.16.100024. doi:[10.1101/2020.05.16.100024](https://doi.org/10.1101/2020.05.16.100024)
- 621 42. Stuart T, Butler A, Hoffman P, et al. Comprehensive Integration of Single-Cell Data. *Cell*.  
622 2019;177(7):1888-1902.e21. doi:[10.1016/j.cell.2019.05.031](https://doi.org/10.1016/j.cell.2019.05.031)
- 623 43. van Dijk D, Sharma R, Nainys J, et al. Recovering Gene Interactions from Single-Cell Data Using Data  
624 Diffusion. *Cell*. 2018;174(3):716-729.e27. doi:[10.1016/j.cell.2018.05.061](https://doi.org/10.1016/j.cell.2018.05.061)
- 625 44. Luecken MD, Büttner M, Chaichoompu K, et al. Benchmarking atlas-level data integration in single-cell  
626 genomics. *bioRxiv*. Published online May 27, 2020:2020.05.22.111161. doi:[10.1101/2020.05.22.111161](https://doi.org/10.1101/2020.05.22.111161)
- 627 45. Tran HTN, Ang KS, Chevrier M, et al. A benchmark of batch-effect correction methods for single-cell RNA  
628 sequencing data. *Genome Biology*. 2020;21(1):12. doi:[10.1186/s13059-019-1850-9](https://doi.org/10.1186/s13059-019-1850-9)
- 629 46. Luecken MD, Theis FJ. Current best practices in single-cell RNA-seq analysis: A tutorial. *Molecular*  
630 *Systems Biology*. 2019;15(6):e8746. doi:[10.15252/msb.20188746](https://doi.org/10.15252/msb.20188746)
- 631 47. Vandenbon A, Diez D. A clustering-independent method for finding differentially expressed genes in  
632 single-cell transcriptome data. *Nature Communications*. 2020;11(1, 1):4318. doi:[10.1038/s41467-020-17900-3](https://doi.org/10.1038/s41467-020-17900-3)
- 633 48. Kallman A, Capowski EE, Wang J, et al. Investigating cone photoreceptor development using patient-  
634 derived NRL null retinal organoids. *Commun Biol*. 2020;3(1):82. doi:[10.1038/s42003-020-0808-5](https://doi.org/10.1038/s42003-020-0808-5)
- 635 49. Hunt RC, Davis AA. Altered expression of keratin and vimentin in human retinal pigment epithelial cells in  
636 vivo and in vitro. *J Cell Physiol*. 1990;145(2):187-199. doi:[10.1002/jcp.1041450202](https://doi.org/10.1002/jcp.1041450202)
- 637 50. Swamy V, McGaughey D. Eye in a Disk: eyeIntegration Human Pan-Eye and Body Transcriptome  
638 Database Version 1.0. *Invest Ophthalmol Vis Sci*. 2019;60(8):3236-3246. doi:[10.1167/iovs.19-27106](https://doi.org/10.1167/iovs.19-27106)

- 639 51. Köster J, Rahmann S. Snakemake—a scalable bioinformatics workflow engine. *Bioinformatics*.  
640 2012;28(19):2520-2522. doi:[10.1093/bioinformatics/bts480](https://doi.org/10.1093/bioinformatics/bts480)
- 641 52. Harrow J, Frankish A, Gonzalez JM, et al. GENCODE: The reference human genome annotation for The  
642 ENCODE Project. *Genome Res*. 2012;22(9):1760-1774. doi:[10.1101/gr.135350.111](https://doi.org/10.1101/gr.135350.111)
- 643 53. J H, A F, Jm G, et al. GENCODE: The reference human genome annotation for The ENCODE Project.  
644 *Genome Res*. 2012;22(9):1760-1774. doi:[10.1101/gr.135350.111](https://doi.org/10.1101/gr.135350.111)
- 645 54. Yates AD, Achuthan P, Akanni W, et al. Ensembl 2020. *Nucleic Acids Research*. 2020;48(D1):D682-D688.  
646 doi:[10.1093/nar/gkz966](https://doi.org/10.1093/nar/gkz966)
- 647 55. Bray NL, Pimentel H, Melsted P, Pachter L. Near-optimal probabilistic RNA-seq quantification. *Nat*  
648 *Biotechnol*. 2016;34(5):525-527. doi:[10.1038/nbt.3519](https://doi.org/10.1038/nbt.3519)
- 649 56. Melsted P, Ntranos V, Pachter L. The barcode, UMI, set format and BUStools. *Bioinformatics*.  
650 2019;35(21):4472-4473. doi:[10.1093/bioinformatics/btz279](https://doi.org/10.1093/bioinformatics/btz279)
- 651 57. Lun ATL, Riesenfeld S, Andrews T, et al. EmptyDrops: Distinguishing cells from empty droplets in  
652 droplet-based single-cell RNA sequencing data. *Genome Biology*. 2019;20(1):63. doi:[10.1186/s13059-019-1662-y](https://doi.org/10.1186/s13059-019-1662-y)
- 653 58. Lun ATL, McCarthy DJ, Marioni JC. A step-by-step workflow for low-level analysis of single-cell RNA-  
654 seq data with Bioconductor. *F1000Res*. 2016;5:2122. doi:[10.12688/f1000research.9501.2](https://doi.org/10.12688/f1000research.9501.2)
- 655 59. Blondel VD, Guillaume J-L, Lambiotte R, Lefebvre E. Fast unfolding of communities in large networks. *J*  
656 *Stat Mech*. 2008;2008(10):P10008. doi:[10.1088/1742-5468/2008/10/P10008](https://doi.org/10.1088/1742-5468/2008/10/P10008)
- 657 60. Traag V, Waltman L, van Eck NJ. From Louvain to Leiden: Guaranteeing well-connected communities. *Sci*  
658 *Rep*. 2019;9(1):5233. doi:[10.1038/s41598-019-41695-z](https://doi.org/10.1038/s41598-019-41695-z)
- 659 61. Stassen SV, Siu DMD, Lee KCM, Ho JWK, So HKH, Tsia KK. PARC: Ultrafast and accurate clustering of  
660 phenotypic data of millions of single cells. *Bioinformatics*. 2020;36(9):2778-2786.  
661 doi:[10.1093/bioinformatics/btaa042](https://doi.org/10.1093/bioinformatics/btaa042)

- 662 62. McInnes L, Healy J, Melville J. UMAP: Uniform Manifold Approximation and Projection for Dimension  
663 Reduction. Published September 17, 2020. Accessed December 21, 2020. <http://arxiv.org/abs/1802.03426>
- 664 63. Büttner M, Miao Z, Wolf FA, Teichmann SA, Theis FJ. A test metric for assessing single-cell RNA-seq  
665 batch correction. *Nature Methods*. 2019;16(1, 1):43-49. doi:[10.1038/s41592-018-0254-1](https://doi.org/10.1038/s41592-018-0254-1)
- 666 64. Gayoso A, Shor J. *JonathanShor/DoubletDetection: Doubletdetection V3.0*. Zenodo; 2020.  
667 doi:[10.5281/zenodo.4359992](https://doi.org/10.5281/zenodo.4359992)
- 668 65. Wolock SL, Lopez R, Klein AM. Scrublet: Computational Identification of Cell Doublets in Single-Cell  
669 Transcriptomic Data. *Cell Systems*. 2019;8(4):281-291.e9. doi:[10.1016/j.cels.2018.11.005](https://doi.org/10.1016/j.cels.2018.11.005)
- 670 66. Bergen V, Lange M, Peidli S, Wolf FA, Theis FJ. Generalizing RNA velocity to transient cell states through  
671 dynamical modeling. *Nature Biotechnology*. 2020;38(12, 12):1408-1414. doi:[10.1038/s41587-020-0591-3](https://doi.org/10.1038/s41587-020-0591-3)
- 672 67. Probabilistic harmonization and annotation of single-cell transcriptomics data with deep generative models.  
673 *Molecular Systems Biology*. 2021;17(1):e9620. doi:[10.15252/msb.20209620](https://doi.org/10.15252/msb.20209620)
