# 1 *Building the Mega Single Cell Transcriptome Ocular Meta-Atlas*

2 Vinay S Swamy<sup>1</sup>, Temesgen D Fufa<sup>2</sup>, Robert B Hufnagel<sup>2</sup>, and David M McGaughey<sup>1,□</sup>

3 March 26, 2021

4 The development of highly scalable single cell transcriptome technology has resulted in the creation of thousands of  
5 datasets, over 30 in the retina alone. Analyzing the transcriptomes between different projects is highly desirable as  
6 this would allow for better assessment of which biological effects are consistent across independent studies.  
7 However it is difficult to compare and contrast data across different projects as there are substantial batch effects  
8 from computational processing, single cell technology utilized, and the natural biological variation. While many  
9 single cell transcriptome specific batch correction methods purport to remove the technical noise it is difficult to  
10 ascertain which method functions works best. We developed a lightweight R package (scPOP) that brings in batch  
11 integration methods and uses a simple heuristic to balance batch merging and celltype/cluster purity. We use this  
12 package along with a Snakefile based workflow system to demonstrate how to optimally merge 766,615 cells from  
13 34 retina datasets and three species to create a massive ocular single cell transcriptome meta-atlas. This provides a  
14 model how to efficiently create meta-atlases for tissues and cells of interest.

15 <sup>1</sup> Bioinformatics Group, Ophthalmic Genetics & Visual Function Branch, National Eye Institute, National

16 Institutes of Health

17 <sup>2</sup> Medical Genetics and Ophthalmic Genomics Unit, National Eye Institute, National Institutes of Health

18 □ Correspondence: [David M McGaughey <mcgaugheyd@mail.nih.gov>](mailto:mcgaugheyd@mail.nih.gov)

## 19 **Introduction**

### 20 **A plethora of single-cell transcriptome studies in the retina**

21 The retina contains a multitude of cell types that, in total, are responsible for turning light information into  
22 signal for the brain to interpret as vision. Very briefly, the photoreceptors (rods and cones) are responsible for  
23 capturing the photons. The retinal pigmented epithelium (RPE) behind the photoreceptors physically support the  
24 rods and cones by processing byproducts of the visual cycle. Müller glia serve as support cells for the neurons. The  
25 retinal bipolar cells transmit the electrical signal from the photoreceptors to the retinal ganglion cells. Horizontal and  
26 amacrine regulate and help interpret signals from the photoreceptors. The signal is relayed via the retinal ganglion  
27 projections through the optic stalk to the brain (for review see<sup>1</sup>). Since 2000 many groups have investigated gene  
28 expression in small numbers of individual cells of the retina.<sup>2-5</sup>

29           The recent introduction of lower cost and high throughput single cell sequencing technology has led to an  
30 explosion of research across many fields. As of early 2021, over 40 million cells have been sequenced across over  
31 1,200 studies and the average size of each study starting in 2020 is over 100,000 cells.<sup>6</sup> The retina was used as the  
32 source tissue in one of the earliest works in the high throughput single cell transcriptomics field.<sup>7</sup> As of late 2020,  
33 over a twenty published studies, cumulatively containing over a million cells, have used single cell technology to  
34 profile cell type specific gene expression patterns, cell fate trajectory, tissue and cell differentiation, and disease  
35 perturbation across multiple mammalian species.<sup>7-29</sup>

36           While the gene - cell count tables are generally made available in repositories like the Gene Expression  
37 Omnibus (GEO), there are no requirements to uniformly process the data. This means the count tables cannot be  
38 used in cross-study comparisons as even small differences in the computational pipeline (aligner, transcriptome  
39 reference, etc.) create study-specific effects. This issue can be addressed only by re-quantifying the data in a uniform  
40 computational environment. Fortunately, due to the continued development of computationally light-weight gene  
41 quantification tools in the single-cell space (e.g kallisto bustools, alevin-fry), re-quantification does not require  
42 massive compute and time resources.<sup>30,31</sup>

43           Still, even after re-quantification under identical computational conditions there remain study specific batch  
44 effects due to the diversity in single cell technologies used and variation in tissue handling and processing across  
45 each scientific group. The single cell community has recognized that removal of these technical (also referred to as  
46 batch) effects is a critical issue and have independently developed many tools, though it remains unclear which tools  
47 and parameters are optimal for a particular dataset.<sup>32-43</sup>

## 48 **The projectable meta-atlas**

49           We propose that by re-processing publicly available raw single cell transcriptome data in a consistent  
50 bioinformatic framework and optimally using batch correction tools we can create a meta-atlas of retina single cell  
51 transcriptomes. As there are thousands of possible permutations of single cell tools, references, and parameter  
52 choices, we create our meta-atlas (which we refer to as the single cell Eye in a Disk or scEiaD) by benchmarking  
53 integration outcomes across multiple important single cell RNA-seq processing parameters (batch removal method,  
54 number of hyper-variable genes (HVGs), clustering resolution, etc.). The benchmarking system we developed uses a  
55 wide variety of metrics that combine in the R package scPOP (single-cell Pick Optimal Parameters). The scEiaD

56 will be of utility to two communities. First, the ocular community who can both search scEiaD for gene expression  
57 across many dimensions (e.g. cluster, cell type, study) and project their own single cell data onto scEiaD for  
58 comparison and rich automatic cell labelling. Second, the computational community can use this very large, well-  
59 curated dataset to test algorithms for compute efficiency and performance in a diverse environment. As we believe  
60 data re-use is a powerful and efficient approach to facilitate discovery, we provide our meta-atlas code-base, the  
61 meta-atlas in several data formats, and propose general guidelines to optimally create custom meta-atlases.

## 62 **Results**

### 63 **We identify 33 ocular scRNA datasets across 3 species**

64 The first step in building a meta-atlas is identifying studies to draw the data from. We identified ocular  
65 single cell RNA sequencing (scRNA) studies by querying PubMed, the Sequence Read Archive (SRA), and the  
66 European Nucleotide Archive (ENA) for the inclusive terms “retina”, “single cell”, “scRNA”, “ocular”, “eye”,  
67 “transcriptome.” We then hand filtered the results to only keep ocular and normal (non-perturbed or mutagenized)  
68 data from single cell RNA-seq technology. On December 2020 we identified 33 deposited datasets that have been  
69 published in 27 publications (Figure 1). To provide a non-ocular reference we also downloaded the raw sequence  
70 data from the Tabula Muris project for re-processing. In cases where the fastq file from the SRA was not processed  
71 properly, we acquired the bam files (SRA or personal correspondence) and re-extracted the fastq. After downloading  
72 all the data we had 11 TB across 2470 fastq file sets.

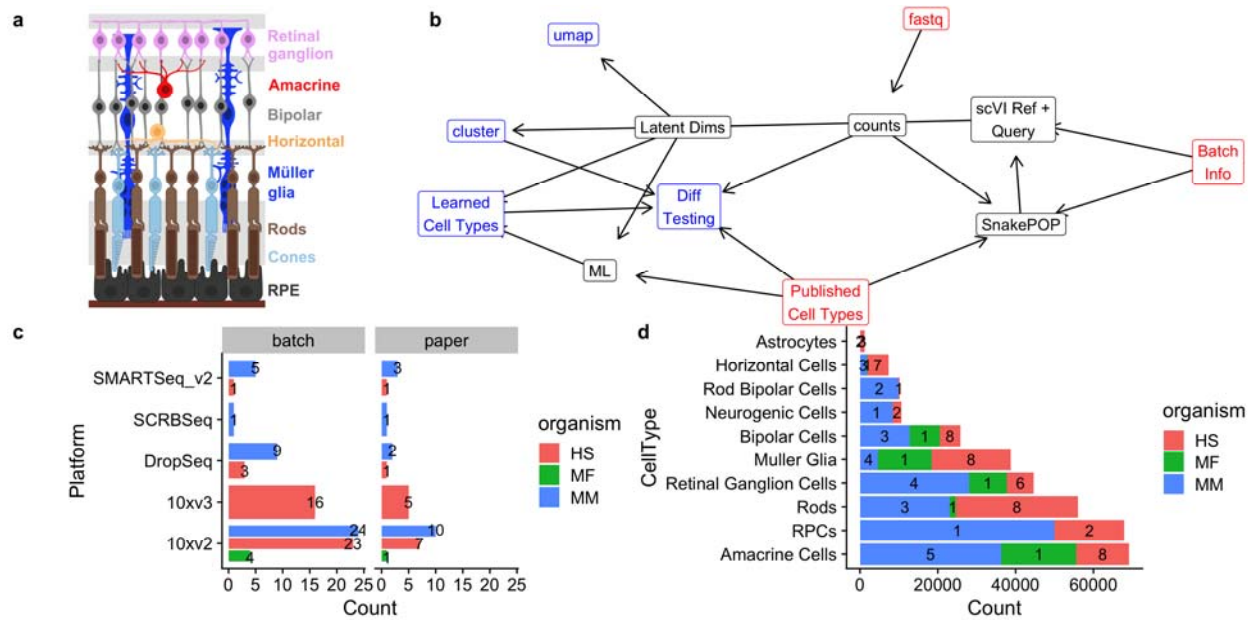

73

74 *Figure 1: a. Schematic of the retina with major cell types delineated b. Simplified directed workflow of major steps*  
 75 *in scEiaD creation from raw counts to gene counts, benchmarking optimal integration methods (SnakePOP) to*  
 76 *produce batch corrected latent dimensions (Latent Dims), then downstream analysis outputs like clustering,*  
 77 *differential gene testing (Diff Testing), and 2D UMAP visualization. c. Counts of published papers and batches*  
 78 *(unique biological samples) for each scRNA technology, split by organism d. Cell type counts extracted from*  
 79 *published studies for the more common retina cell types, split by species. Count of study accessions for each species*  
 80 *overlaid on bar plot.*

## 81 Transcriptome quantification across multiple technologies

82 Droplet and well based scRNA-seq technologies require different quantification approaches as the former  
 83 have UMI and multiple cells are quantified within a single file. We wrote a Snakemake based pipeline  
 84 (SnakeQUANT, see methods) to quantify and merge both droplet and well based technologies into a single matrix  
 85 for downstream processing. For well based data we perform both gene and isoform level quantification; for droplet  
 86 base technologies we quantify both exonic and intronic gene-level expression to facilitate calculation of RNA  
 87 velocity. In total we quantify 6.7e+10 molecules, finding 1.1e+10 unique molecules with a mean pseudoalignment  
 88 rate of 66.5%. Across the 766,615 cells (post QC) we have an average of 3,410 RNA counts across 978 unique genes  
 89 (see Supplemental File kallisto\_stats.tsv and splicing\_stats.tsv for more details).

## 90 1,204,269 cells before quality control

91 Gene-level counts were quantified with the kallisto bustools pseudo-aligner for both the droplet and well  
 92 based samples. After empty droplet removal, we had 1,204,269 cells. We then removed cells which had more than

93 10% mitochondrial reads across all gene counts or fewer than 200 unique genes quantified. After these standard  
94 quality control steps we were left with 790,072 cells (Supplemental Figure 1).

95 A core objective of many scRNA based studies is labeling the cell types. As this information is crucial to  
96 assess dataset integration and provide an accurate reference for user querying, we extracted individual cell labels  
97 with a combination of inspecting the GEO web site, supplemental information from the publication, web resources  
98 (e.g. a web app was created for the paper), and personal correspondence. After normalizing cell type name  
99 nomenclature, we obtained labels for 375,966 cells across 33 cell types (Supplemental Table 1).

## 100 **Running 11 tools in a Snakemake-based system**

101 Disentangling the technical and biological effects when integrating multiple datasets is crucial. We define  
102 batch as each unique biological sample and assume each study is at least one unique sample. We studied the  
103 metadata and methods of each study to identify the unique biological samples. Within the current scEiaD data set we  
104 identified 86 batches across 34 deposited datasets in 26 published papers.

105 A wide variety of methods have been written for scRNA-seq integration. As we were uncertain which  
106 would perform the best, we ran 11 tools with a commonly used set of key parameters like number of hyper variable  
107 genes (HVG), size of latent dimensional space, and the number of nearest neighbors for the louvain clustering  
108 algorithm. The Snakemake system was used to automate the running of the wide variety of tools. In total 5,591 jobs  
109 were run to quantify gene expression and build the unified Seurat objects (SnakeQUANT) and 2,446 jobs were run  
110 to assess integration performance (SnakePOP).

111 The two key metrics which have to be balanced in order to optimize integration performance are cell type  
112 or cluster purity (where different cell types or clusters should be homogenous) and batch mixing (the same cell types  
113 should be similar across independent studies). While these can be visually assessed by looking at marker gene  
114 expression across the 2D UMAP projection, it is more rigorous and scalable to quantify these diametrically opposed  
115 characteristics.

## 116 **scPOP wraps several different methods for measuring integration performance.**

117 Multiple methods have been proposed to quantitatively evaluate batch correction. Some of these metrics  
118 evaluate the concordance between sets of labels, while other compute distances between the individual data points of

119 a given set of labels. While any one of these methods can be useful, we propose that calculating and evaluating them  
120 in tandem provides greater accuracy for dataset integration. We developed the R package scPOP, a lightweight, low  
121 dependency R package which brings together the Local Simpson Index (LISI), Average Silhouette Width (ASW),  
122 Adjusted Rand Index (ARI) and Normalized Mutual Information (NMI) metrics from the R packages Harmony,  
123 kBET and aricode, respectively. The LISI and ASW were used to measure batch mixing (where lower is better), cell  
124 type mixing (higher is better), and cluster mixing (higher is better). NMI and ARI were used to assess the  
125 consistency of cell type to cluster assignment (where 1 is perfect correspondence between cluster and cell type).

126 To visualize the interplay between batch mixing and cell type distinction we plot the batch mixing LISI  
127 score (which has been multiplied by -1) on the y-axis (higher is better) against the cluster LISI on the x-axis (higher  
128 is better). The best performer on both metrics will be in the top right corner (Supplemental Figure 2a). In the same  
129 manner we plot the silhouette metric (Supplemental Figure 2 b). To merge the different scores we define  
130  $sumZScale = \sum scale(m)$  where m is a metric (LISI by batch, LISI by cluster, LISI by cell type, silhouette by  
131 batch, silhouette by cluster, silhouette by celltype, NMI, and ARI).

132 On one extreme we have ComBat, which merges together different batches very well, but also mixes  
133 together the distinct cell types (Figure 2a). The other extreme is not using any batch integration method, where you  
134 see very distinct groups of cells, but also each nearly study is has a distinct region in the UMAP (Figure 2b). In our  
135 scEiaD dataset we see that like ComBat, Harmony and CCA are weighed more towards batch mixing then cluster  
136 and cell type purity. Scanorama, fastMNN, and bbknn prioritize cleanly separating the clusters. With our scEiaD  
137 meta-atlas insct, trVAE, and magic do not perform particularly well in batch mixing or cluster purity. Across the 11  
138 integration methods we tested, scVI achieved the highest sumZScale for out scEiaD meta-atlas.

### 139 **Different normalization methods alter integration performance**

140 There are several normalization approaches that have been used or published. The “standard” approach that  
141 the popular analysis packages Seurat and anndata use by default is to, per cell, divide the counts by the sum counts  
142 for the cell, multiply by a scaling factor, then log transform. This helps make the count distribution more normal,  
143 which is an assumption that many algorithms require. In contrast, the scran normalization method groups cells into  
144 pools and normalizes across the pool summed counts instead of the individual cell counts. We also use the square  
145 root (sqrt) normalization which replaces the log transformation with a square root. Library size (libSize)



146 normalization omits the sqrt or log transformation. Finally some methods, like scVI, directly use the raw counts data  
 147 for modeling the data.

148 As expected the libSize normalization which omits the log or square root scaling generally performs the  
 149 worst (Figure 2c). We see that the remaining normalization techniques alter the batch correction performance,  
 150 though the outcome differs across the different methods. We also see that changing the number of latent dimensions  
 151 (8 or 30) can occasionally dramatically change performance. These results demonstrate the importance of assessing  
 152 performance in a rigorous manner across many parameters.

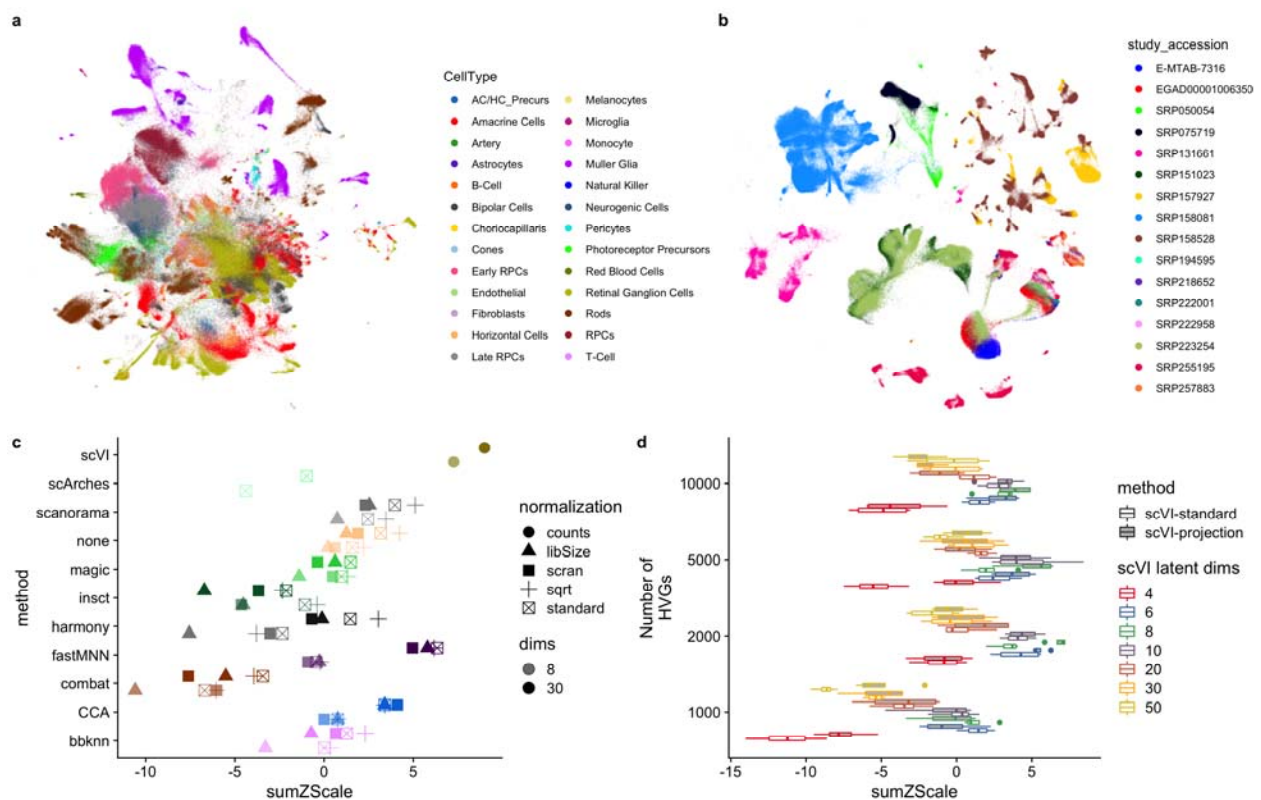

153  
 154 *Figure 2: a. Example of a method (combat) which has a high level of batch blending, but poor separation of cell*  
 155 *types (colored by cell type). b. no batch correction cleanly separates cell types but does not mix batches (colored by*  
 156 *study). c. sumZScale (higher is better) for each method across a variety of data normalizations. All methods shown*  
 157 *here use 2000 HVG, lowain clustering, and 8 latent dimensions. Each color is a different method. d. Boxplot of 4*  
 158 *different clustering resolutions for across 1000 to 10000 HVG numbers and 4 to 50 scVI latent dimensions. Open*  
 159 *boxes are using scVI-standard and gray boxes are scVI-projection (human reference with the remaining data*  
 160 *projected)*

## 161 Further optimization of scVI with grid search and projection

162 To find the best set of parameters for scVI in our dataset we did a grid search across key parameters: HVG,  
 163 latent dimensions, and k nearest neighbors. Furthermore we used a recent advance in scVI capability ( $\geq$  version

164 0.8.0) adapted from scArches that allows one to build a reference model and query or project the new cells onto it.<sup>40</sup>  
165 We refer to this projectable model as “scVI-projection”, and the previous scVI model as “scVI-standard”. We built a  
166 scVI-projected model trained on human cells and then projected the mouse and macaque data onto it. We then  
167 compared scVI-projection against the against the previous scVI-standard across all the previously mentioned  
168 parameters. Using scPOP we first saw that the scVIprojection approach generally performed better than running  
169 scVI with all of the data (Figure 2d). We found the optimal overall parameters to be 5000 HVG, 8 latent dimensions,  
170 and with 5 k-nearest neighbors for the cluster finding. We also varied the UMAP projection values of nearest  
171 neighbors and minimum distance to qualitatively pick a 2D projection, selecting a minimum distance of 0.1 and 50  
172 nearest neighbors.

### 173 **High accuracy xgboost ML model built to label unknown cell types across all technologies**

174 To further study cell type specific expression patterning we needed to label the 414,106 unlabeled cells.  
175 Traditionally this is done by clustering the cells, then using cell type specific markers to label the clusters. However,  
176 as we had hundreds of thousands of expert labeled cells across 17 publications (Figure 1a) we built a xgboost-based  
177 machine learning model that used 2/3 of the labeled cells as a training set (see methods for more details) to train a  
178 cell type predictor for scEiaD input. The trained model was used to predict the cell type assignments for all cells in  
179 scEiaD. In this manner we both label most cells (cells which cannot assign a cell type with a probability above 0.5  
180 were left unlabeled) and correct a small number of probable mislabels in the truth set (Figure 3a).

181 As a brief case study of our ML performance, we look at the cell type labels assigned to a Shekhar et  
182 al. study where they used SMART-seq on a retinal bipolar cell enriched population of cells<sup>21</sup>. Even though our ML  
183 algorithm was trained only on droplet-based data, our algorithm labels most of this dataset as retinal bipolar cells,  
184 with the next most common cell types being amacrine. The same result was found by Shekhkar et al. (Supplemental  
185 Figure 3). To more generally evaluate performance we use the precision recall (PR) curve, which visualizes the  
186 ability of the model to precisely label known cells at a given confidence. The area under the PR curve (AUC)  
187 summarizes the effectiveness of the model across different cell types, with 1 being the highest performance. The  
188 xgboost model can predict rods, bipolar cells, and Müller glia with near perfect performance (Supplemental Figure  
189 4). Most of the remaining cell types can be predicted with an AUC over 0.9 Supplemental Table 2. Several of the  
190 precursor cell types (photoreceptor, AC/HC, and neurogenic) were labeled with lower confidence Supplemental



191 Table 3. The next most common labels for these cell types were either other precursor cells (e.g. 100 AC/HC  
 192 Precursors were labeled as Neurogenic) or the adjacent terminal cell type (e.g. 254 photoreceptor precursors were  
 193 labeled as cones). Other cell types that were challenging for the model to predict were the artery, choriocapillaris,  
 194 and vein. Artery, choriocapillaris, and vein are constructed from endothelial cells and we find that for all three of  
 195 these, endothelial was the second most common label. Overall, our xgboost based ML model shows strong accuracy  
 196 across the major cell types of the retina (overall AUC of 0.98).

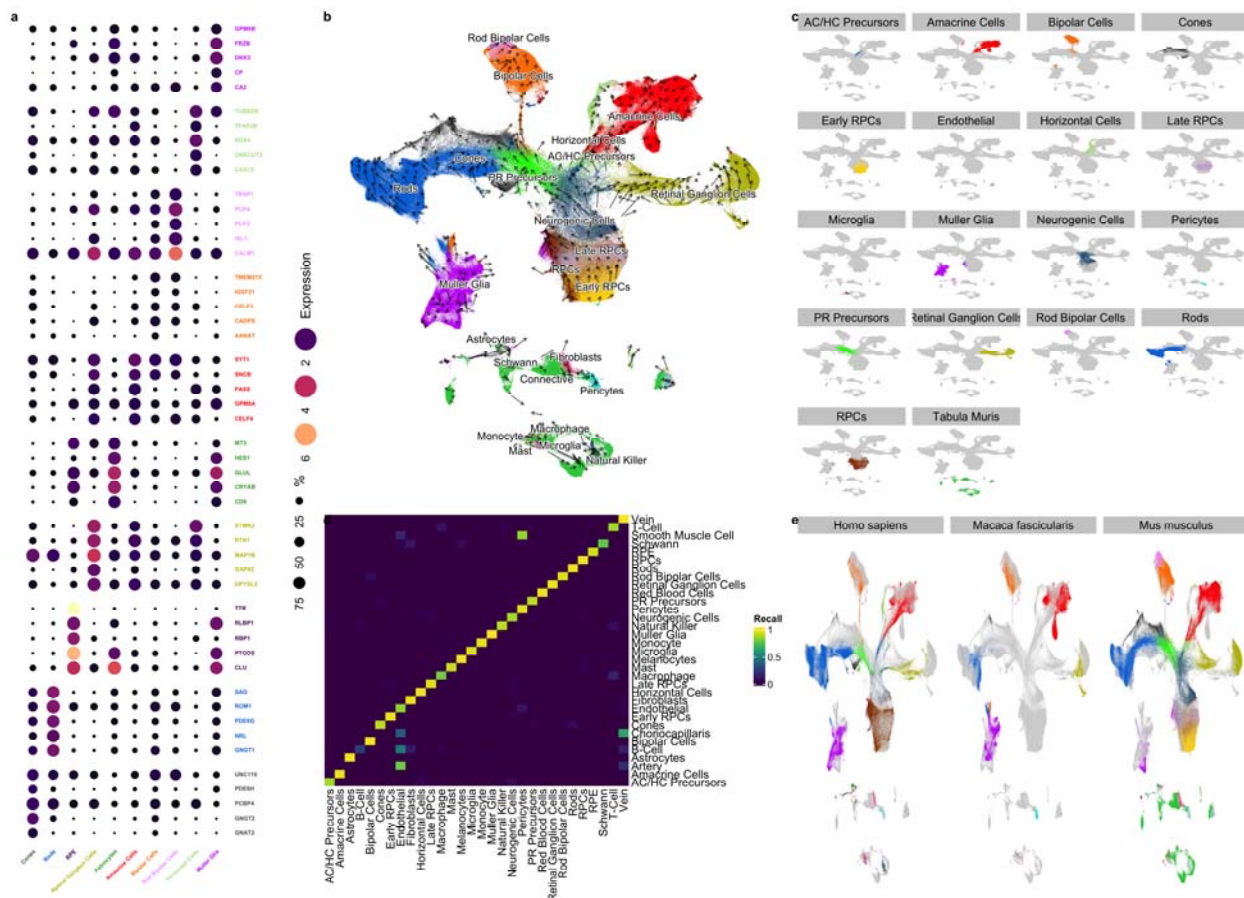

197  
 198 *Figure 3: a. Top genes that are differentially expressed across the major cell types of the retina (PR is short for*  
 199 *Photoreceptor). Genes are colored by which cell type they are differentially expressed in. The dot size is*  
 200 *proportional to the percentage of those cells that have detectable levels of the gene. The color of the dot is the log2*  
 201 *scaled CPM expression. b. 2D UMAP projection of scEiaD, colored by cell type (Tabula Muris data is gray). Arrows*  
 202 *are scvelo RNA velocity. Longer arrows are cells with higher velocity (relatively more unsplliced transcripts).*  
 203 *c. Facet plot that demonstrates how each major cell type of the retina is contained within a distinct space.*  
 204 *d. Confusion matrix of cell type prediction performance of our xgboost labeller between predicted (x axis) and*  
 205 *known (y axis) using data withheld from the machine learner. Most of the cell types are indeed labeled as their true*  
 206 *type. e. Faceting of 2D UMAP by species and colored by cell type demonstrate how the major cell types of the retina*  
 207 *share space with like cell types, despite being from mouse, human, and macaque.*

## 208 **ML cell type labels result in high study diversity for each cell type**

209           After ML projection of cell type labels from the original 375966 labels onto a total of 758278 cells we have  
210 substantially improved the number of studies per cell type. For example, we went from 8 human studies with labeled  
211 Müller Glia to 14 after labeling (Supplemental Table 4). Overall we go from an average of 4 studies per human cell  
212 type to 8 and 2 studies per mouse cell type to 8 after transferring the cell type labels.

213           As another check on the quality of the cell type assignments, we ran the cell and cluster independent  
214 haystack gene search and pairwise differential expression tests between the predicted cell types (see methods for  
215 further details). We show the five most differentially expressed genes for each of the major retina cell types are  
216 consistent with known retinal cell markers (Figure 3a). As a simple metric to identify known and unknown genes  
217 relating to the cell type specific expression we search PubMed for the number of publications with two searches per  
218 gene. We expect most of the genes identified to be known in the literature. The first search is the more precise “gene  
219 AND cell type” (e.g. “PDE6H AND Cones”) and the second search is the more inclusive “gene AND retina”  
220 (e.g. “PDE6H AND Retina”). Of the 50 genes in (Figure 3a), 37 had one or more citations in the gene - cell type  
221 search (Supplemental File celltype\_markers.tsv) and 45 had one or more citation in the inclusive search. The 50  
222 genes had a mean of 46 studies (with the inclusive gene by “retina” search). In contrast, 100 randomly chosen genes  
223 had a mean of 2 (wilcox test  $p < 1.44 \times 10^{-17}$ ).

## 224 **The scVI-based scEiaD UMAP projection blends batches and species while separating cell** 225 **types**

226           The 2D UMAP projection of the scVI-calculated batch corrected 8 latent dimensional space blends the 33  
227 studies together while also maintaining distinct space for the 31 unique cell types. We also see good mixing across  
228 all the droplet and well based single cell technologies (Supplemental Figure 5). We see the neurogenic and  
229 progenitor populations from which the retinal cell types are derived near the center of the UMAP visualization. The  
230 photoreceptor precursors are adjacent to the neurogenic population and, as demonstrated by the RNA velocity  
231 dynamics, flow into the rods and cones. The amacrine and horizontal precursors (AC/HC) likewise flow from the  
232 neurogenic center into the mature amacrine and horizontal cells.

233           The photoreceptors (cones and rods) of the retina which are responsible for color and low-light vision,  
234 respectively, are near each other in the UMAP space. The major remaining retina cell types, by proportion in the

235 mammalian eye are the Müller Glia, which are a glial cell type which help support the neurons of the retina. Next we  
236 have the neural cell types which transmit and help interpret the signals from the photoreceptors before they leave the  
237 retina via the optic stalk: the amacrine cells, retinal ganglia, horizontal, and bipolar cells. All of these cells are in  
238 well separated spaces in the UMAP. Finally we see across species that the major cell types overlap each other  
239 (Figure 3d). The macaque retina cells are not present in the precursor/neurogenic center of the UMAP as expected  
240 because only fully developed tissues were sampled in these data.

241 While by eye the UMAP 2D projection generally blends together the three different species (macaque,  
242 mouse, human) in the UMAP visualization, we more rigorously tested this by changing the inputs to our xgboost cell  
243 type predictor machine learning system. We trained two new models: one with only human data and one with only  
244 mouse data. We then applied this model to the other two species to see whether the model trained on one species was  
245 generally transferable to another species. Again, both models (human only and mouse only) both proved to be highly  
246 accurate at predicting cell types in the other species with the terminal cell types (Supplemental Figure 6).

## 247 **Projection of outside data onto scEiaD demonstrates similarities and differences of iPSC** 248 **and organoids to primary cells**

249 The hard work of creating this resource can be leveraged and extended by the wider community with a few  
250 relatively simple steps and modest compute requirements. Very briefly, if outside groups quantify their mouse or  
251 human scRNA with kallisto (bustools) and the same references (see methods), they can overlay their data on top of  
252 scEiaD by 1. installing scVI (version 0.9.0 or higher), 2. downloading our 13 megabyte scVI model, and 3.  
253 following the Jupyter notebook on Google colab that we provide as a live demo available from  
254 <https://github.com/davemcg/scEiaD>. We demonstrate the power of this approach in two ways.

255 First, a wild-type retinal organoid dataset from Kallman et al was projected onto scEiaD.<sup>44</sup> In the Google  
256 colab notebook we show how a subset of the reads from Kallman et al.'s SRR12130660 can be processed from the  
257 raw reads to a UMAP visualization in under 10 minutes. Indeed we see how organoid-based retinal cell types can be  
258 detected overlapping primary cells for RPCs, photoreceptors, amacrine cells, and retinal ganglion cells  
259 (Supplemental Figure 7).

260 Finally, we demonstrate how the RPE derived from the Bharti iPSC differentiation process express  
261 canonical RPE markers of TTR and RPE65 but end up in a slightly different position in the UMAP projectionFigure

262 4a). Differential expression analysis (see methods) identified that vimentin is nearly exclusively expressed in the  
263 iPSC-based RPE Figure 4b). This result is not surprising as Hunt et al. demonstrated that cultured and proliferating  
264 RPE express high levels of vimentin<sup>45</sup> and this same trend is seen in bulk RNA-seq from stem cell RPE and primary  
265 RPE Supplemental Figure 8).<sup>46</sup>

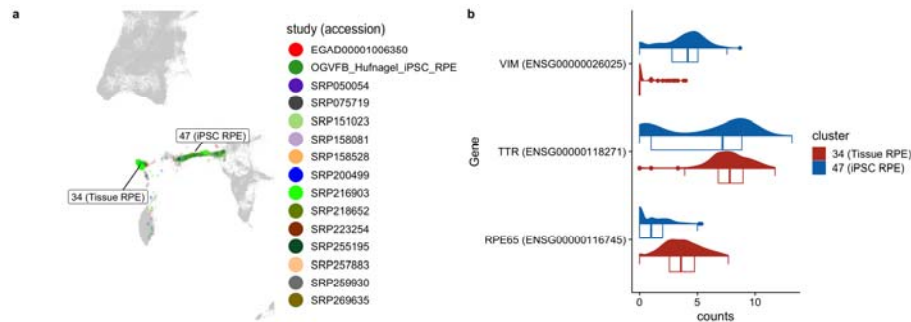

266

267 *Figure 4: a. RPE distribution colored by study demonstrates how the most RPE are in two locations. iPSC-based*  
268 *RPE we provided are located more enriched in cluster 47. Tissue RPE more enriched in cluster 34 b. Violin plot of*  
269 *two functional RPE markers (TTR, RPE65) and vimentin (proliferating RPE marker)*

## 270 Methods

### 271 Reproducibility

272 The set of Snakemake pipelines that takes in the raw fastq sequence and outputs the scEiaD is at  
273 <https://github.com/davemcg/scEiad>.<sup>47</sup> The publication commit is #9d3c5e1 Furthermore, the repository has been  
274 deposited at Zenodo under 10.5281/zenodo.4638117 We will briefly discuss the pipeline choices, programs and  
275 algorithms, and versions below. For the R packages, we provide package versions as the supplementary file  
276 “R\_session\_info.txt”

### 277 Quantification of gene counts

278 Gene quantification is handled by the SnakeQUANT snakefile. First, we generated multiple quantification  
279 indices to facilitate calculation of RNA velocity. For each droplet technology, we generated a separate set of  
280 transcript sequences that contain both exonic and intronic sequences using the “get\_velocity\_files” function from the  
281 R package BUSpaRse. The reference transcriptome annotation used to build sets of transcript sequences were the  
282 Gencode “gencode.vM25.annotation.gtf.gz” and “gencode.v35.annotation.gtf.gz” for mouse and human,  
283 respectively.<sup>48,49</sup> Because the Macaca Fascicularis genome is less well annotated we used the Ensembl release 101

284 genome and transcriptome annotation “Macaca\_mulatta.Mmul\_101.gtf.gz.”<sup>50</sup> A single set of exonic transcript  
285 sequences was created for each species for all well technologies. A kallisto quantification index was generated for  
286 each of these fastas using kallisto index (0.46.2).<sup>51</sup> Well based samples were quantified using kallisto quant. For the  
287 relatively few single ended samples, the params “-single -l 200 -s 30” were used for kallisto quant. Otherwise the “-  
288 bias” flag was added. For the droplet-based samples, we adapted the bustools workflow for generating spliced and  
289 unspliced count matrices. (0.39.4).<sup>52</sup>

## 290 **Intersection of gene names between mouse, macaque, and human**

291 To facilitate comparison of gene expression across species, where possible we converted mouse and  
292 macaque gene ids and names to human ones. We downloaded a mapping of orthologous genes between human,  
293 mouse, and macaque using the Ensembl BioMart web browser in November 2020. We identified 15,759 human  
294 genes that could be directly mapped to mouse and macaque orthologs. Genes present in mouse or macaque that were  
295 not found in human were not used for HVG gene selection, but were retained and used for differential gene  
296 expression.

## 297 **Custom macaque reference quantification**

298 As we noticed that several retina marker genes (e.g. NRL and CRX) had very low expression in the  
299 macaque data we quantified the scRNA data twice: once with the Ensembl reference and again with the same  
300 Gencode human reference used for the human data. We compared the gene-level counts for each cell and replaced  
301 the macaque gene count with the human counts if the human counts were greater than the macaque counts and, to  
302 prevent genes with very few total counts from being used, we required the counts greater than the first quartile of  
303 non-zero macaque gene expression.

## 304 **Remove empty droplets and further QC.**

305 After bustools count, we used R (3.6.2) to remove empty droplets. The BUSpaRse package was used to  
306 input the bustools counts mtx file. The DropletUtils package with the “barcodeRanks” function was used to  
307 automatically detect the inflection point in the barcode count ranks that delineates the likely empty droplets.<sup>53</sup> We  
308 then removed cells with percent mitochondrial reads of >10%. After merging the individual count matrices into one  
309 sparse matrix, we created a Seurat version 3 object and removed cells with fewer than 200 detected unique genes,  
310 and for the droplet data, more than 3000 detected genes (these are likely to be doublets).<sup>32</sup>

## 311 **Normalization and batch effect correction**

312           The following steps (normalization through benchmarking are handled by the SnakePOP pipeline) We  
313 tested several gene count normalization approaches as we were not certain which would produce an optimal  
314 outcome: standard (default Seurat, library size normalization, then log transform), sqrt (same, but with sqrt  
315 normalization), libSize (omit the log or sqrt normalization), scran, SCT from Seurat, and for scVI, no normalization  
316 (counts).<sup>54</sup> Our R implementation of the normalization approaches as well as how we constructed the Seurat v3  
317 object can be found in the supplementary file “make\_seurat\_obj\_functions.R”

## 318 **Batch normalization under a grid search procedure**

319           We tested scArches, bbknn, insct, magic, scVI, CCA, scanorama, harmony, fastMNN, combat, none against  
320 2000 HVGs, the different gene count normalization procedures discussed above, and both 8 and 30 outputted batch  
321 corrected latent dimensions. The latent dimensions are the input for clustering, the 2D UMAP visualization, and the  
322 xgboost machine learning to transfer cell type labels to unlabeled cells. We were unable to run every method  
323 successfully with every normalization method. Magic could not complete with the standard or libSize normalization.  
324 CCA could not complete with the libSize normalization. We also tried the DESC, liger, and Conos batch corrections  
325 methods but were unable to get them to work reliably so they were dropped. The batch correction step  
326 implementation can be found the supplementary file “merge\_methods.R” and in the github repo  
327 ([https://github.com/davemcg/scEiaD/blob/master/src/merge\\_methods.R](https://github.com/davemcg/scEiaD/blob/master/src/merge_methods.R)).

## 328 **Clustering and UMAP**

329           Louvain-Jaccard clustering against the batch corrected latent dimensions used the Seurat implementation.<sup>55</sup>  
330 We tried the k-nearest neighbors (knn) parameters 5 and 7 (where 5 gives more clusters than 7). We also used the  
331 leiden algorithm as implemented by PARC with a resolution of 0.6 and 0.8 (higher results in more clusters).<sup>56,57</sup>  
332 These two resolutions were chosen as they roughly gave the same number of clusters at the Seurat Louvain-Jaccard  
333 approach with a knn 7.

334           The UMAP visualization was calculated with the Seurat “RunUMAP” using the uwot R package.<sup>58</sup> We  
335 tried min.dist parameters of 0.001, 0.1, and 0.3 and tried n.neighbors across 15, 30, 100, and 500. A smaller min.dist  
336 value gives “tighter” groupings while a higher number of n.neighbors uses a larger number of near cells to calculate  
337 the global positioning.



## 338 **Benchmarking and scPOP**

339 We wrote the scPOP R package to unify the LISI and Silhouette metrics from Harmony and kBet,  
340 respectively, along with NMI and ARI.<sup>36,59</sup> LISI and Silhouette require a dense matrix, which is a problem for our  
341 data as a 766615 cell by 8 latent dimension dense matrix cannot fit in our largest available memory node (1.5 TB).  
342 We down-sampled the dataset to ~100,000 cells, taking care to keep all rarer cell types for the LISI and Silhouette  
343 benchmarking.

344 To merge these metrics into a balanced single score, we Z scale each and sum them. scPOP produces both  
345 tables and visualizations allowing the user to quickly see both the interplay of batch mixing and cluster/cell type  
346 separation and the overall performance. If a user wishes to prioritize batch mixing or cluster/cell type separation we  
347 let the user provide a custom batch/cluster-cell type scaling value (1 is the default).

## 348 **Multi-step doublet removal**

349 To identify probable doublets (more than one cell in a droplet) we ran DoubletDetect and scrublet and  
350 calculated the distribution of DoubletDetect and scrublet scores across all clusters and removed clusters with a score  
351 in both metrics greater than 4 standard deviations above the mean.<sup>60,61</sup> This removed another 23,457 cells, leaving  
352 766,615 in total.

## 353 **xgboost based cell type model**

354 In order to identify cell types for the 361,456 unlabeled cells we designed a custom xgboost based cell type  
355 classifier. We took labeled data and split it into training (2/3) and test (1/3) sets, stratified by cell type. The input  
356 features used to train the model are the scVI latent dimensions, the total number of reads in each cell, the number  
357 genes detected in each cell, and the percent mitochondrial gene expression of each cell. We additionally generated  
358 features using the age of each sample by group sample into three developmental categories (Early Development,  
359 Late Development, and Adult) and then generated a one-hot encoded feature for each category. In order to speed up  
360 training times, we used the gpu implementation of the xgboost algorithm from the the xgboost python library. The  
361 model was trained using default parameters. The trained model had an overall macro and micro AUC score of 0.98  
362 and 0.99, respectively. This model was then used to identify labels for all cells. Unlabeled data was pre-processed  
363 identically to training data and fed into model to generate a vector of label probabilities for each cell. We selected  
364 the highest label probability for each cell, and required a minimum probability of 0.5 to assign a label to a cell.

365 For the organism specific xgboost ML we followed the above procedure, except that we combined Early  
366 RPCs, Late RPCs, and RPCs into one category and did not attempt to predict the non-retina cell types  
367 (e.g. fibroblasts) as there were very few labeled cells across all three organisms.

### 368 **Marker gene identification**

369 To identify marker genes across the CellType (predict) and cluster groups, we used the scran findmarkers  
370 (wilcox test) along with the singleCellHaystack algorithm. The scran findmarkers test runs a wilcox test in a  
371 pairwise manner (e.g. Rods vs all other cell types). It returns an overall p-value (and FDR) that assesses how well  
372 the gene is at separating the group of interest from all other cells. It also returns for each pair-wise comparison an  
373 area under the curve (AUC) score, where 1 is a perfect power to distinguish and 0 is no power. The  
374 singleCellHaystack algorithm uses a Kullback-Leibler divergence (D KL) measurement of the scVI lower  
375 dimensional space to identify genes with non-random distribution. A higher D KL score represents a gene with  
376 “specific” expression in the lower dimensional space and is used to calculate a FDR corrected p value against the  
377 full distribution of D KL values. We filtered to keep genes with scran FDR < 1, a mean AUC > 0.2, and a log10(D  
378 KL FDR) < -10000. No more than 50 genes for each cell type were retained (sorted by mean AUC).

### 379 **Calculation of RNA velocity**

380 RNA velocity calculations were with the velocraptor wrapping of the scVelo python library.<sup>62</sup> From the  
381 anndata objects generated by our Snakemake pipeline we calculated velocity across all genes. Genes without  
382 detectable velocity were dropped. The scVI generated latent space (instead of PCA) was used to calculate first and  
383 second order moments. The calculated moments were used to estimate RNA velocity. Differential velocity was  
384 tested between celltypes using pairwise wilcox rank sum tests.

## 385 **Conclusion**

### 386 **Limitations**

387 The scVI model is first built the on human data. The mouse and macaque data are then projected (or  
388 queried) onto it with the scVI implementation of the scArches method. While this system works very well to  
389 integrate information between these three species, this approach may not scale to more distantly related species.

390 Another limitation is that discrepancies between cell type labels between different labs makes certain transitioning  
391 cell type labels a bit imprecise. One example is how the rods and photoreceptor precursor labels partially overlap.  
392 Though we attempted to ameliorate the issue by removing cell type labels in large disagreement with the consensus,  
393 some disagreements could propagate into our machine labeled cells type assignments. These issues may reflect  
394 labeling continuous processes with discrete labels.

395 While scEiaD distinguishes the major cell types very well, some of the cell types contain many “sub types”  
396 - notably the amacrine cells have a huge variety in morphology with a recent study identifying over sixty different  
397 types of amacrine cells in mouse.<sup>29</sup> At this time our batch corrected pan retina cell space does not precisely resolve  
398 these sub cell types with high resolution. We are actively working to “sub cluster” the cell types so we can robustly  
399 and reliably identify the high diversity of retinal cell types across the entire retina.

#### 400 **The scEiaD is a unique ocular resource that provides a highly diverse, large N dataset with** 401 **a relatively small amount of compute power**

402 We have assembled the largest ocular single cell transcriptome database to date. The rapid of advancement  
403 of algorithms to batch correct and process data continue to reduce the computational requirements to handle huge  
404 numbers of cells. The scVI batch correction step on around one million cells runs within a few hours on a GPU and  
405 150GB of memory. This places this crucial step within the capabilities of a moderately powerful computer or a cloud  
406 compute node. Further downstream processing can largely be done a computers with 64+ Gb of memory and a few  
407 hundred GB of disk space. We believe that our efforts can be replicated in any other tissue / system with a large  
408 number of independent studies by a small number of computational scientists following our general approach. We  
409 provide the completed analysis as both Scanpy (h5ad) and Seurat objects at <https://github.com/davemcg/scEiaD>.

#### 410 **Benchmarking and quantitation of integration performance is crucial for meta-atlas** 411 **studies**

412 We originally intended to use the Seurat CCA method to integrate the datasets. However, the long run-times  
413 of CCA and poor integration of our known cell types led us to benchmark more methods and parameters. After  
414 adding more integration methods we first attempted “hand-assess” the integration results by using the UMAP 2D  
415 projection view. This proved to scale poorly and this led use to curate some of the more useful benchmarking  
416 algorithms (NMI, ARI, silhouette, and LISI) that roughly matched our “hand-assessed” results into the scPOP R

417 package. While we chose the scVI algorithm, we strongly suggest any other groups attempting a similar meta-atlas  
418 construction chose a quantifiable set of criteria so optimal methods and parameters can be picked.

### 419 **Transfer of cell type labels from a smaller number of studies onto the remaining cells is a** 420 **powerful way to increase diversity in a meta-atlas**

421 We first hand curated over 350,000 published cell type labels across 24 publications. With a xgboost  
422 algorithm using the latent dimensions, cell age classification (developing or matured), and the UMAP coordinates,  
423 we can very accurately label the remaining cells. Many other cell type labeling algorithms and systems exist for  
424 those groups less willing or able to tune a machine learning algorithm. For example, the developers of scVI also  
425 have a cell type label projection algorithm called scANVI. Whichever approach you use, taking a smaller number of  
426 high quality labels and projecting them onto the remaining cells is a powerful way to leverage community  
427 knowledge across a huge diverse dataset.

### 428 **Projection allows community knowledge to be leveraged by all**

429 Many retina atlases have been published to date. We argue that we have created the first atlas that is  
430 generally useful because 1. our dataset/atlas is several times larger than any other published set, 2. our data is  
431 available via download in several forms at <https://github.com/davemcg/scEiaD>, and crucially 3. we provide a  
432 Google colab/Jupyter notebook which exactly lays out how to use scVI to project (or query) outside data onto our  
433 scEiaD with minimum compute resources. We demonstrate concretely how this can work by showing how iPSC  
434 RPE can be queried onto the reference dataset to demonstrate both similarities and dissimilarities in their  
435 transcriptomes.

## 436 **Supplemental Information**

### 437 **Tables**

| CellType         | HS Published | MF Published | MM Published | HS Transferred | MF Transferred | MM Transferred |
|------------------|--------------|--------------|--------------|----------------|----------------|----------------|
| AC/HC Precursors | 1,450        | 0            | 0            | 2,779          | 2              | 291            |
| Amacrine Cells   | 13,430       | 19,246       | 35,837       | 21,179         | 36,308         | 53,958         |
| Artery           | 167          | 0            | 0            | 0              | 0              | 0              |
| Astrocytes       | 1,102        | 0            | 39           | 1,699          | 64             | 326            |
| B-Cell           | 509          | 0            | 8,109        | 336            | 27             | 76             |
| Bipolar Cells    | 5,012        | 7,617        | 15,536       | 9,855          | 14,342         | 32,573         |
| Choriocapillaris | 225          | 0            | 0            | 0              | 0              | 0              |
| Cones            | 3,242        | 694          | 4,705        | 6,844          | 1,107          | 18,509         |
| Endothelial      | 420          | 295          | 3,678        | 1,048          | 370            | 3,926          |
| Fibroblasts      | 1,632        | 0            | 221          | 2,037          | 16             | 3,477          |

| CellType               | HS Published | MF Published | MM Published | HS Transferred | MF Transferred | MM Transferred |
|------------------------|--------------|--------------|--------------|----------------|----------------|----------------|
| Horizontal Cells       | 5,282        | 163          | 1,719        | 9,033          | 259            | 8,501          |
| Macrophage             | 559          | 0            | 0            | 586            | 0              | 91             |
| Mast                   | 101          | 0            | 0            | 216            | 0              | 177            |
| Melanocytes            | 259          | 0            | 0            | 323            | 1              | 3              |
| Microglia              | 425          | 154          | 25           | 829            | 206            | 978            |
| Monocyte               | 311          | 0            | 25           | 369            | 0              | 454            |
| Muller Glia            | 19,303       | 13,763       | 4,368        | 26,508         | 25,025         | 9,325          |
| Natural Killer         | 168          | 0            | 0            | 221            | 0              | 4              |
| Neurogenic Cells       | 2,166        | 0            | 8,314        | 5,255          | 12             | 28,811         |
| Pericytes              | 457          | 2,459        | 20           | 583            | 3,703          | 1,228          |
| PR Precursors          | 2,009        | 0            | 5,122        | 6,540          | 1              | 16,107         |
| Red Blood Cells        | 63           | 0            | 1,737        | 706            | 6              | 1,842          |
| Retinal Ganglion Cells | 6,663        | 9,762        | 27,887       | 10,308         | 12,495         | 41,112         |
| Rod Bipolar Cells      | 392          | 0            | 9,837        | 600            | 0              | 11,838         |
| Rods                   | 31,292       | 1,481        | 22,887       | 69,339         | 14,004         | 58,129         |
| RPCs                   | 17,701       | 0            | 0            | 35,696         | 191            | 5,403          |
| RPE                    | 369          | 0            | 0            | 573            | 27             | 1,501          |
| Schwann                | 288          | 0            | 0            | 501            | 5              | 284            |
| Smooth Muscle Cell     | 45           | 0            | 0            | 0              | 0              | 0              |
| T-Cell                 | 1,075        | 0            | 4,335        | 1,238          | 24             | 49             |
| Unlabelled             | 101,950      | 53,641       | 235,058      | 1,119          | 1,074          | 6,144          |
| Vein                   | 490          | 0            | 0            | 1,021          | 0              | 37             |
| Early RPCs             | 0            | 0            | 27,962       | 898            | 6              | 35,080         |
| Late RPCs              | 0            | 0            | 21,362       | 318            | 0              | 34,444         |

438 *Supplemental Table 1: Counts for cell type labels. Published are the author created labels from the*  
 439 *published datasets. Transferred are the cell labels that were transferred by our xgboost-based machine learning*  
 440 *model onto the entire scEiaD dataset.*

| AUC  | Cell Type      | Study           |
|------|----------------|-----------------|
| 0.76 | AC/HC_Precurs  | All             |
| 0.71 | AC/HC_Precurs  | SRP151023       |
| 0.83 | AC/HC_Precurs  | SRP223254       |
| 0.99 | Amacrine Cells | All             |
| 0.20 | Amacrine Cells | E-MTAB-7316     |
| 1.00 | Amacrine Cells | EGAD00001006350 |
| 0.97 | Amacrine Cells | SRP050054       |
| 0.98 | Amacrine Cells | SRP075719       |
| 0.98 | Amacrine Cells | SRP151023       |
| 0.93 | Amacrine Cells | SRP158081       |
| 1.00 | Amacrine Cells | SRP158528       |
| 1.00 | Amacrine Cells | SRP194595       |
| 0.72 | Amacrine Cells | SRP222001       |
| 1.00 | Amacrine Cells | SRP222958       |
| 0.98 | Amacrine Cells | SRP223254       |
| 1.00 | Amacrine Cells | SRP255195       |
| 0.97 | Astrocytes     | All             |
| 1.00 | Astrocytes     | E-MTAB-7316     |
| 0.97 | Astrocytes     | EGAD00001006350 |
| 0.94 | Astrocytes     | SRP050054       |
| 1.00 | Astrocytes     | SRP255195       |
| 0.97 | B Cell         | All             |
| 0.81 | B Cell         | EGAD00001006350 |
| 1.00 | B Cell         | SRP131661       |
| 0.41 | B Cell         | SRP218652       |
| 0.91 | B Cell         | SRP257883       |
| 0.98 | Bipolar Cells  | All             |
| 1.00 | Bipolar Cells  | E-MTAB-7316     |
| 1.00 | Bipolar Cells  | EGAD00001006350 |
| 0.97 | Bipolar Cells  | SRP050054       |
| 0.99 | Bipolar Cells  | SRP075719       |

| AUC  | Cell Type        | Study           |
|------|------------------|-----------------|
| 0.97 | Bipolar Cells    | SRP151023       |
| 0.94 | Bipolar Cells    | SRP158081       |
| 1.00 | Bipolar Cells    | SRP158528       |
| 1.00 | Bipolar Cells    | SRP194595       |
| 1.00 | Bipolar Cells    | SRP222001       |
| 1.00 | Bipolar Cells    | SRP222958       |
| 0.98 | Bipolar Cells    | SRP223254       |
| 1.00 | Bipolar Cells    | SRP255195       |
| 0.94 | Cones            | All             |
| 1.00 | Cones            | E-MTAB-7316     |
| 1.00 | Cones            | EGAD00001006350 |
| 0.96 | Cones            | SRP050054       |
| 0.71 | Cones            | SRP151023       |
| 0.88 | Cones            | SRP158081       |
| 0.97 | Cones            | SRP158528       |
| 1.00 | Cones            | SRP194595       |
| 1.00 | Cones            | SRP222001       |
| 0.47 | Cones            | SRP222958       |
| 0.97 | Cones            | SRP223254       |
| 0.90 | Cones            | SRP255195       |
| 0.98 | Early RPCs       | All             |
| 0.99 | Early RPCs       | SRP158081       |
| 0.97 | Endothelial      | All             |
| 0.98 | Endothelial      | EGAD00001006350 |
| 0.99 | Endothelial      | SRP050054       |
| 1.00 | Endothelial      | SRP131661       |
| 0.94 | Endothelial      | SRP158528       |
| 1.00 | Endothelial      | SRP194595       |
| 0.00 | Endothelial      | SRP218652       |
| 1.00 | Endothelial      | SRP222958       |
| 0.59 | Endothelial      | SRP255195       |
| 0.97 | Fibroblasts      | All             |
| 1.00 | Fibroblasts      | EGAD00001006350 |
| 0.95 | Fibroblasts      | SRP050054       |
| 0.99 | Fibroblasts      | SRP131661       |
| 0.53 | Fibroblasts      | SRP218652       |
| 0.99 | Fibroblasts      | SRP257883       |
| 0.96 | Horizontal Cells | All             |
| 1.00 | Horizontal Cells | E-MTAB-7316     |
| 1.00 | Horizontal Cells | EGAD00001006350 |
| 0.97 | Horizontal Cells | SRP050054       |
| 0.99 | Horizontal Cells | SRP151023       |
| 0.79 | Horizontal Cells | SRP158081       |
| 0.92 | Horizontal Cells | SRP158528       |
| 1.00 | Horizontal Cells | SRP222001       |
| 1.00 | Horizontal Cells | SRP222958       |
| 0.98 | Horizontal Cells | SRP223254       |
| 1.00 | Horizontal Cells | SRP255195       |
| 0.97 | Late RPCs        | All             |
| 0.97 | Late RPCs        | SRP158081       |
| 0.70 | Macrophage       | All             |
| 0.58 | Macrophage       | SRP218652       |
| 0.97 | Macrophage       | SRP257883       |
| 0.83 | Mast             | All             |
| 0.92 | Mast             | EGAD00001006350 |
| 0.96 | Mast             | SRP218652       |
| 0.97 | Melanocytes      | All             |
| 1.00 | Melanocytes      | EGAD00001006350 |
| 0.00 | Melanocytes      | SRP218652       |
| 0.98 | Melanocytes      | SRP257883       |
| 0.96 | Microglia        | All             |
| 0.95 | Microglia        | E-MTAB-7316     |
| 1.00 | Microglia        | EGAD00001006350 |
| 0.96 | Microglia        | SRP050054       |
| 0.96 | Microglia        | SRP158528       |
| 1.00 | Microglia        | SRP194595       |
| 1.00 | Microglia        | SRP222001       |



| AUC  | Cell Type                | Study           |
|------|--------------------------|-----------------|
| 0.90 | Microglia                | SRP222958       |
| 1.00 | Microglia                | SRP255195       |
| 0.97 | Monocyte                 | All             |
| 0.99 | Monocyte                 | EGAD00001006350 |
| 0.99 | Muller Glia              | All             |
| 1.00 | Muller Glia              | E-MTAB-7316     |
| 1.00 | Muller Glia              | EGAD00001006350 |
| 1.00 | Muller Glia              | SRP050054       |
| 1.00 | Muller Glia              | SRP075719       |
| 0.80 | Muller Glia              | SRP151023       |
| 0.74 | Muller Glia              | SRP158081       |
| 1.00 | Muller Glia              | SRP158528       |
| 1.00 | Muller Glia              | SRP194595       |
| 1.00 | Muller Glia              | SRP222001       |
| 0.99 | Muller Glia              | SRP222958       |
| 0.99 | Muller Glia              | SRP223254       |
| 1.00 | Muller Glia              | SRP255195       |
| 0.89 | Natural Killer           | All             |
| 0.97 | Natural Killer           | EGAD00001006350 |
| 0.81 | Neurogenic Cells         | All             |
| 0.76 | Neurogenic Cells         | SRP151023       |
| 0.85 | Neurogenic Cells         | SRP158081       |
| 0.63 | Neurogenic Cells         | SRP223254       |
| 0.95 | Pericytes                | All             |
| 0.97 | Pericytes                | EGAD00001006350 |
| 0.98 | Pericytes                | SRP158528       |
| 0.14 | Pericytes                | SRP218652       |
| 0.98 | Pericytes                | SRP257883       |
| 0.69 | Photoreceptor Precursors | All             |
| 0.48 | Photoreceptor Precursors | SRP151023       |
| 0.91 | Photoreceptor Precursors | SRP158081       |
| 0.40 | Photoreceptor Precursors | SRP223254       |
| 0.98 | Red Blood Cells          | All             |
| 1.00 | Red Blood Cells          | SRP131661       |
| 0.96 | Red Blood Cells          | SRP158081       |
| 0.78 | Red Blood Cells          | SRP257883       |
| 0.99 | Retinal Ganglion Cells   | All             |
| 0.10 | Retinal Ganglion Cells   | E-MTAB-7316     |
| 1.00 | Retinal Ganglion Cells   | EGAD00001006350 |
| 1.00 | Retinal Ganglion Cells   | SRP050054       |
| 0.98 | Retinal Ganglion Cells   | SRP151023       |
| 0.93 | Retinal Ganglion Cells   | SRP158081       |
| 1.00 | Retinal Ganglion Cells   | SRP158528       |
| 1.00 | Retinal Ganglion Cells   | SRP222958       |
| 0.98 | Retinal Ganglion Cells   | SRP223254       |
| 1.00 | Retinal Ganglion Cells   | SRP255195       |
| 0.99 | Rod Bipolar Cells        | All             |
| 1.00 | Rod Bipolar Cells        | EGAD00001006350 |
| 1.00 | Rod Bipolar Cells        | SRP075719       |
| 0.99 | Rods                     | All             |
| 1.00 | Rods                     | E-MTAB-7316     |
| 1.00 | Rods                     | EGAD00001006350 |
| 0.97 | Rods                     | SRP050054       |
| 0.96 | Rods                     | SRP151023       |
| 0.97 | Rods                     | SRP158081       |
| 0.96 | Rods                     | SRP158528       |
| 1.00 | Rods                     | SRP194595       |
| 1.00 | Rods                     | SRP222001       |
| 1.00 | Rods                     | SRP222958       |
| 0.97 | Rods                     | SRP223254       |
| 0.96 | Rods                     | SRP255195       |
| 0.98 | RPCs                     | All             |
| 0.99 | RPCs                     | SRP151023       |
| 0.99 | RPCs                     | SRP223254       |
| 0.94 | RPE                      | All             |
| 1.00 | RPE                      | EGAD00001006350 |
| 0.81 | Schwann                  | All             |

| AUC  | Cell Type | Study           |
|------|-----------|-----------------|
| 0.38 | Schwann   | SRP218652       |
| 1.00 | Schwann   | SRP257883       |
| 0.97 | T Cell    | All             |
| 0.98 | T Cell    | EGAD00001006350 |
| 0.99 | T Cell    | SRP131661       |
| 0.05 | T Cell    | SRP218652       |
| 0.99 | T Cell    | SRP257883       |
| 0.91 | Vein      | All             |
| 1.00 | Vein      | SRP257883       |

441 *Supplemental Table 2: Area under the precision recall curve (AUC) for each cell type, split by study. The*

442 *“All” study is the AUC score across all cells within the cell type*

| CellType         | CellType_predict | Count  | Ratio |
|------------------|------------------|--------|-------|
| AC/HC Precursors | AC/HC Precursors | 1,248  | 0.86  |
| AC/HC Precursors | Neurogenic Cells | 100    | 0.07  |
| AC/HC Precursors | Horizontal Cells | 64     | 0.04  |
| Amacrine Cells   | Amacrine Cells   | 65,815 | 0.96  |
| Artery           | Endothelial      | 129    | 0.79  |
| Artery           | Vein             | 32     | 0.20  |
| Astrocytes       | Astrocytes       | 1,103  | 0.97  |
| B-Cell           | Endothelial      | 235    | 0.48  |
| B-Cell           | B-Cell           | 119    | 0.24  |
| B-Cell           | Vein             | 65     | 0.13  |
| B-Cell           | Fibroblasts      | 54     | 0.11  |
| B-Cell           | Macrophage       | 14     | 0.03  |
| Bipolar Cells    | Bipolar Cells    | 27,417 | 0.97  |
| Choriocapillaris | Vein             | 140    | 0.64  |
| Choriocapillaris | Endothelial      | 78     | 0.36  |
| Cones            | Cones            | 7,771  | 0.90  |
| Cones            | Rods             | 452    | 0.05  |
| Cones            | PR Precursors    | 265    | 0.03  |
| Early RPCs       | Early RPCs       | 26,654 | 0.96  |
| Early RPCs       | Neurogenic Cells | 607    | 0.02  |
| Endothelial      | Endothelial      | 781    | 0.84  |
| Endothelial      | Pericytes        | 94     | 0.10  |
| Endothelial      | Vein             | 27     | 0.03  |
| Fibroblasts      | Fibroblasts      | 1,585  | 0.96  |
| Fibroblasts      | Vein             | 48     | 0.03  |
| Horizontal Cells | Horizontal Cells | 6,902  | 0.96  |
| Late RPCs        | Late RPCs        | 20,162 | 0.95  |
| Late RPCs        | Early RPCs       | 496    | 0.02  |
| Late RPCs        | Neurogenic Cells | 458    | 0.02  |
| Macrophage       | Macrophage       | 443    | 0.80  |
| Macrophage       | T-Cell           | 83     | 0.15  |
| Macrophage       | Mast             | 14     | 0.03  |
| Mast             | Mast             | 90     | 0.92  |
| Mast             | RPCs             | 3      | 0.03  |
| Melanocytes      | Melanocytes      | 252    | 0.97  |
| Microglia        | Microglia        | 560    | 0.94  |
| Monocyte         | Monocyte         | 316    | 0.95  |
| Monocyte         | Microglia        | 7      | 0.02  |
| Muller Glia      | Muller Glia      | 36,671 | 0.98  |
| Natural Killer   | Natural Killer   | 150    | 0.90  |
| Natural Killer   | T-Cell           | 11     | 0.07  |
| Natural Killer   | B-Cell           | 4      | 0.02  |
| Neurogenic Cells | Neurogenic Cells | 9,061  | 0.87  |
| Neurogenic Cells | RPCs             | 392    | 0.04  |
| Neurogenic Cells | Late RPCs        | 339    | 0.03  |
| Neurogenic Cells | Early RPCs       | 225    | 0.02  |
| Neurogenic Cells | PR Precursors    | 223    | 0.02  |
| Pericytes        | Pericytes        | 2,771  | 0.95  |
| Pericytes        | Vein             | 96     | 0.03  |

| CellType               | CellType_predict       | Count  | Ratio |
|------------------------|------------------------|--------|-------|
| PR Precursors          | PR Precursors          | 6,377  | 0.90  |
| PR Precursors          | Cones                  | 254    | 0.04  |
| PR Precursors          | Neurogenic Cells       | 230    | 0.03  |
| PR Precursors          | Rods                   | 147    | 0.02  |
| Red Blood Cells        | Red Blood Cells        | 673    | 0.97  |
| Retinal Ganglion Cells | Retinal Ganglion Cells | 42,766 | 0.97  |
| Rod Bipolar Cells      | Rod Bipolar Cells      | 9,634  | 0.94  |
| Rod Bipolar Cells      | Bipolar Cells          | 589    | 0.06  |
| Rods                   | Rods                   | 53,731 | 0.97  |
| Rods                   | PR Precursors          | 1,477  | 0.03  |
| RPCs                   | RPCs                   | 17,135 | 0.97  |
| RPE                    | RPE                    | 343    | 0.93  |
| RPE                    | RPCs                   | 13     | 0.04  |
| Schwann                | Schwann                | 220    | 0.77  |
| Schwann                | Fibroblasts            | 28     | 0.10  |
| Schwann                | Melanocytes            | 16     | 0.06  |
| Schwann                | Pericytes              | 12     | 0.04  |
| Smooth Muscle Cell     | Pericytes              | 38     | 0.84  |
| Smooth Muscle Cell     | Endothelial            | 7      | 0.16  |
| T-Cell                 | T-Cell                 | 923    | 0.86  |
| T-Cell                 | Macrophage             | 91     | 0.09  |
| T-Cell                 | Natural Killer         | 29     | 0.03  |
| Vein                   | Vein                   | 481    | 0.98  |

443 *Supplemental Table 3: Counts of cell type labels with our xgboost machine learning system (PredCellType)*  
 444 *and the published cell type labels (TrueCellType). Ratio is calculated as CellType that were labeled as*  
 445 *CellType\_predict. Ratio < 0.05 were filtered out from view in the table.*

| CellType          | HS Studies (published) | MF Studies (published) | MM Studies (published) | HS Studies (transferred) | MF Studies (transferred) | MM Studies (transferred) |
|-------------------|------------------------|------------------------|------------------------|--------------------------|--------------------------|--------------------------|
| AC/HC Precursors  | 2                      | 0                      | 0                      | 4                        | 1                        | 3                        |
| Amacrine Cells    | 8                      | 1                      | 5                      | 11                       | 1                        | 15                       |
| Artery            | 1                      | 0                      | 0                      | 0                        | 0                        | 0                        |
| Astrocytes        | 3                      | 0                      | 2                      | 10                       | 1                        | 7                        |
| B-Cell            | 3                      | 0                      | 1                      | 8                        | 1                        | 8                        |
| Bipolar Cells     | 8                      | 1                      | 4                      | 11                       | 1                        | 14                       |
| Choriocapillaries | 1                      | 0                      | 0                      | 0                        | 0                        | 0                        |
| Cones             | 8                      | 1                      | 3                      | 11                       | 1                        | 16                       |
| Endothelial       | 6                      | 1                      | 3                      | 11                       | 1                        | 10                       |
| Fibroblasts       | 3                      | 0                      | 2                      | 9                        | 1                        | 11                       |
| Horizontal Cells  | 7                      | 1                      | 3                      | 10                       | 1                        | 11                       |
| Macrophage        | 2                      | 0                      | 0                      | 8                        | 0                        | 4                        |
| Mast              | 2                      | 0                      | 0                      | 9                        | 0                        | 3                        |
| Melanocytes       | 3                      | 0                      | 0                      | 7                        | 1                        | 2                        |
| Microglia         | 6                      | 1                      | 2                      | 13                       | 1                        | 10                       |
| Monocyte          | 1                      | 0                      | 1                      | 9                        | 0                        | 8                        |
| Muller Glia       | 8                      | 1                      | 4                      | 14                       | 1                        | 13                       |
| Natural Killer    | 1                      | 0                      | 0                      | 5                        | 0                        | 2                        |
| Neurogenic Cells  | 2                      | 0                      | 1                      | 5                        | 1                        | 7                        |
| Pericytes         | 3                      | 1                      | 1                      | 9                        | 1                        | 7                        |
| PR Precursors     | 2                      | 0                      | 1                      | 4                        | 1                        | 4                        |

| CellType               | HS Studies (published) | MF Studies (published) | MM Studies (published) | HS Studies (transferred) | MF Studies (transferred) | MM Studies (transferred) |
|------------------------|------------------------|------------------------|------------------------|--------------------------|--------------------------|--------------------------|
| Red Blood Cells        | 1                      | 0                      | 2                      | 11                       | 1                        | 12                       |
| Retinal Ganglion Cells | 6                      | 1                      | 4                      | 11                       | 1                        | 16                       |
| Rod Bipolar Cells      | 1                      | 0                      | 2                      | 7                        | 0                        | 9                        |
| Rods                   | 8                      | 1                      | 3                      | 13                       | 1                        | 15                       |
| RPCs                   | 2                      | 0                      | 0                      | 10                       | 1                        | 10                       |
| RPE                    | 2                      | 0                      | 0                      | 7                        | 1                        | 7                        |
| Schwann                | 2                      | 0                      | 0                      | 8                        | 1                        | 3                        |
| Smooth Muscle Cell     | 1                      | 0                      | 0                      | 0                        | 0                        | 0                        |
| T-Cell                 | 3                      | 0                      | 1                      | 7                        | 1                        | 7                        |
| Unlabelled             | 15                     | 1                      | 18                     | 11                       | 1                        | 16                       |
| Vein                   | 1                      | 0                      | 0                      | 5                        | 0                        | 3                        |
| Early RPCs             | 0                      | 0                      | 1                      | 4                        | 1                        | 8                        |
| Late RPCs              | 0                      | 0                      | 1                      | 3                        | 0                        | 6                        |

446 *Supplemental Table 4: Counts for number of studies with cell types labels before and after cell type label*

447 *transfer*

448 **Figures**

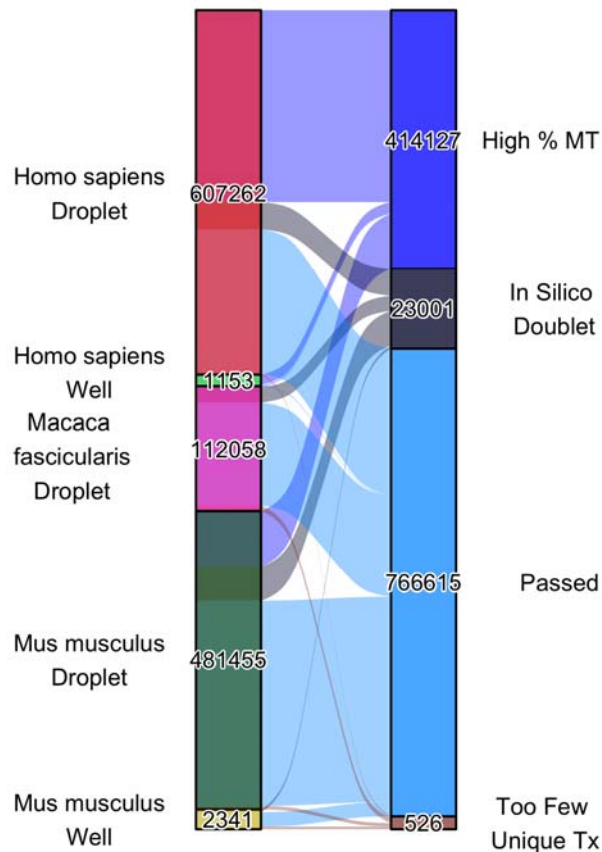

449

450 *Supplemental Figure 1: The left bar delineates the number of cells for each organism - technology combination. The*  
 451 *right bar specifies the number of each cells in each post QC category. In silico doublets were identified with scrublet*  
 452 *and DoubletDetector.*

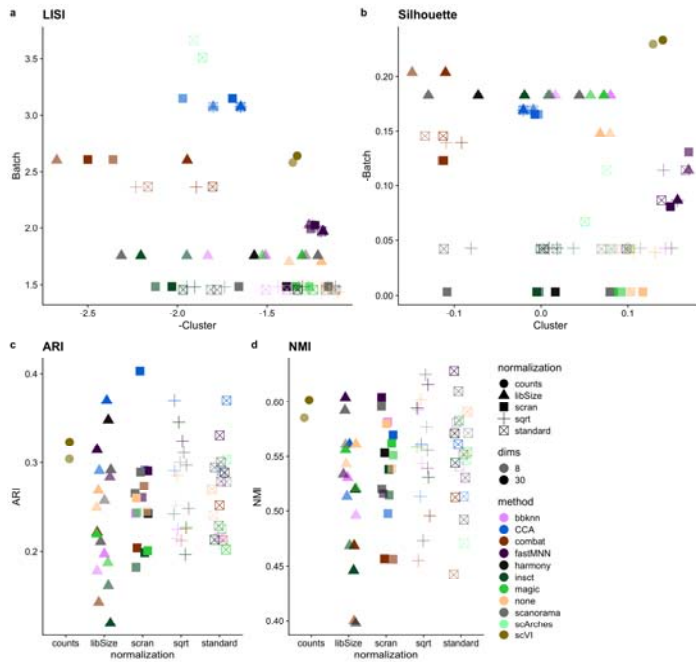

453

454 *Supplemental Figure 2: Performance of the various batch correction tools across various benchmarking metrics.*  
 455 *For the LISI and Silhouette plots in A, B higher (y-axis) means better batch mixing and further to the right (x-axis)*  
 456 *means better cluster purity. For the ARI and NMI metrics (which reflects how well cluster matches with cell type) in*  
 457 *C, D, higher means a better score.*

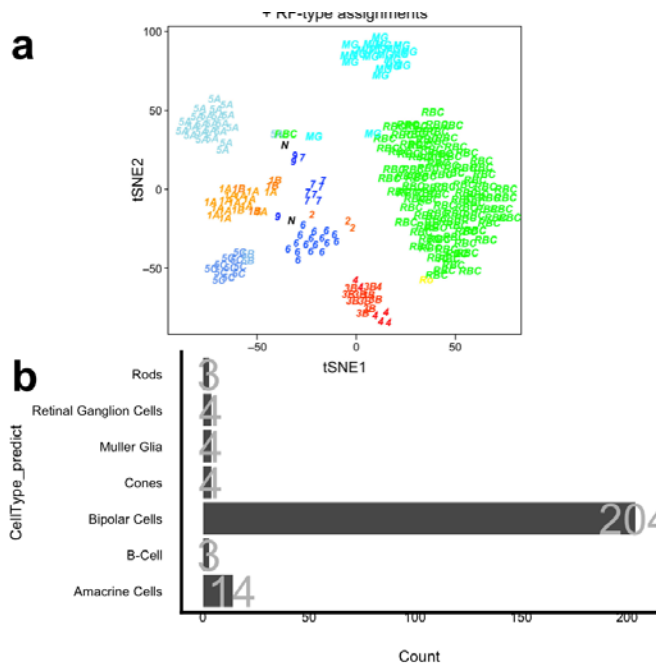

458

459 *Supplemental Figure 3: Our xgboost ML properly labels this Shekhar et al. RBC FAC sorted population as enriched*  
 460 *in RBC*

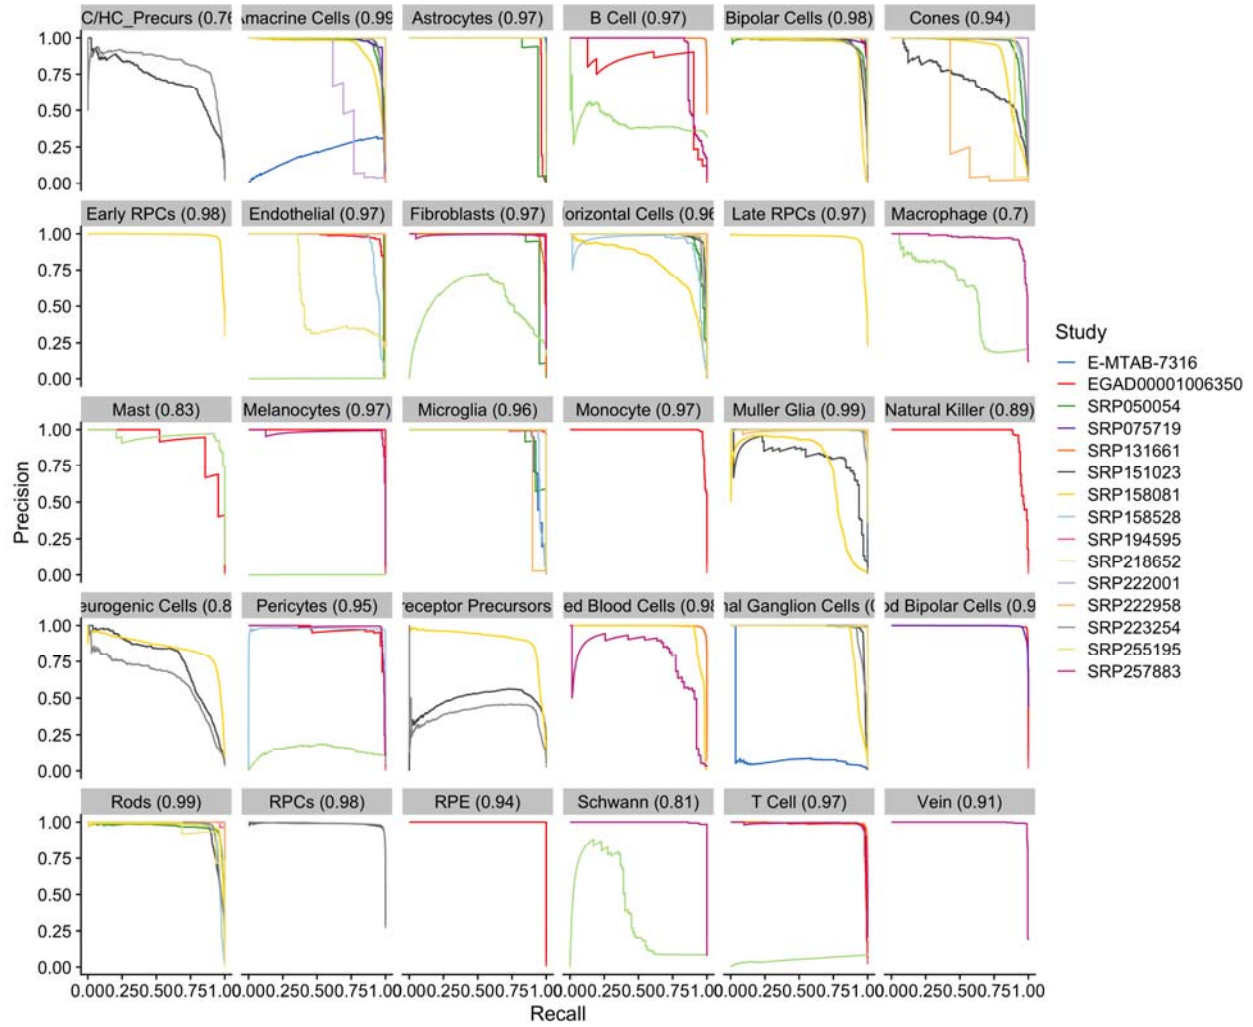

461

462 *Supplemental Figure 4: Precision recall curves for our xgboost cell type predictor model across each cell type*  
 463 *predicted*



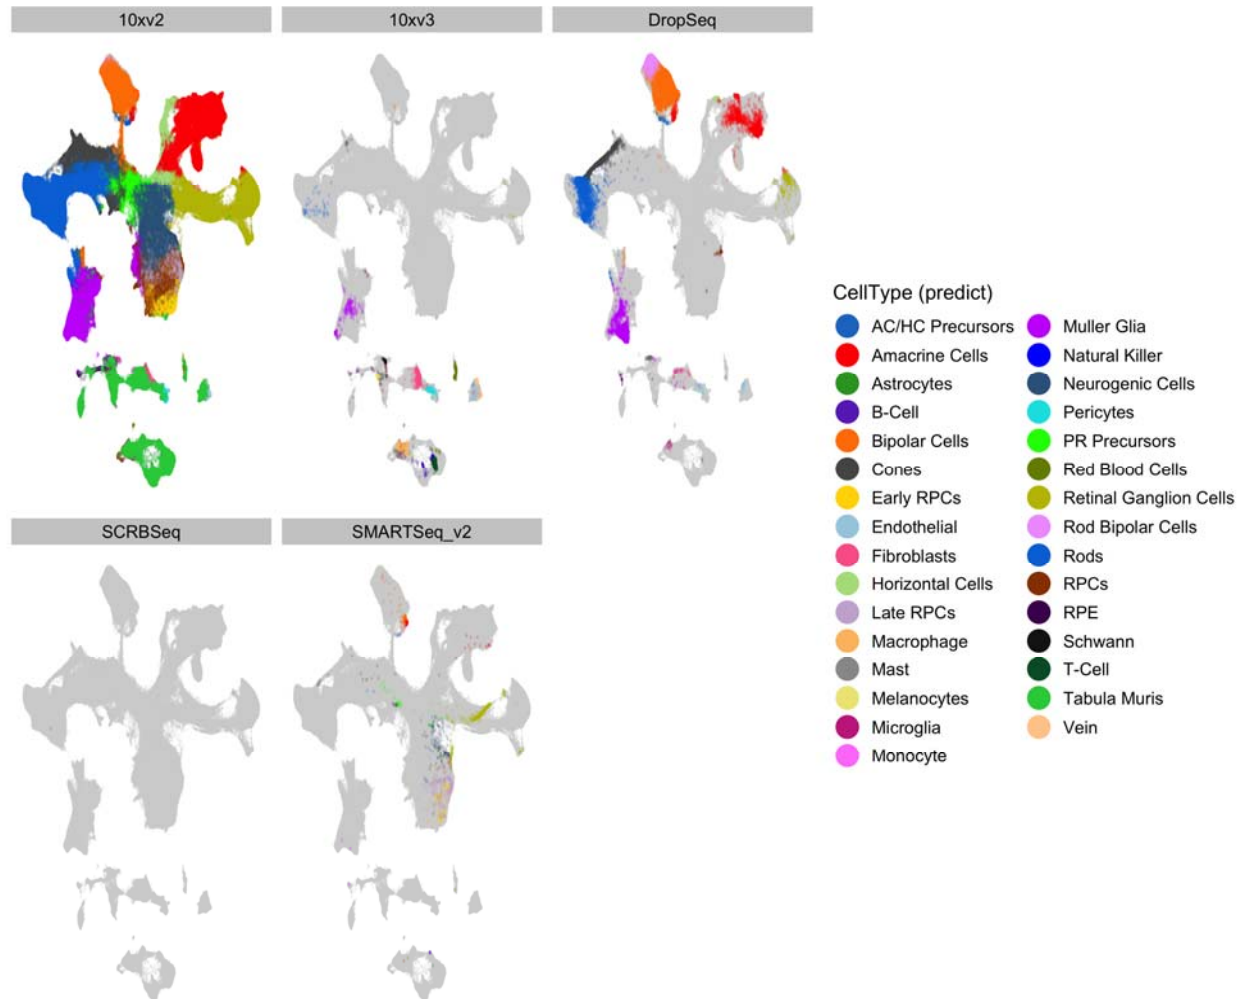

464

465 *Supplemental Figure 5: Distribution of cell types across the 2D UMAP confirms that the cell types are being*  
466 *properly placed despite the wide variety of single sequencing platforms present.*

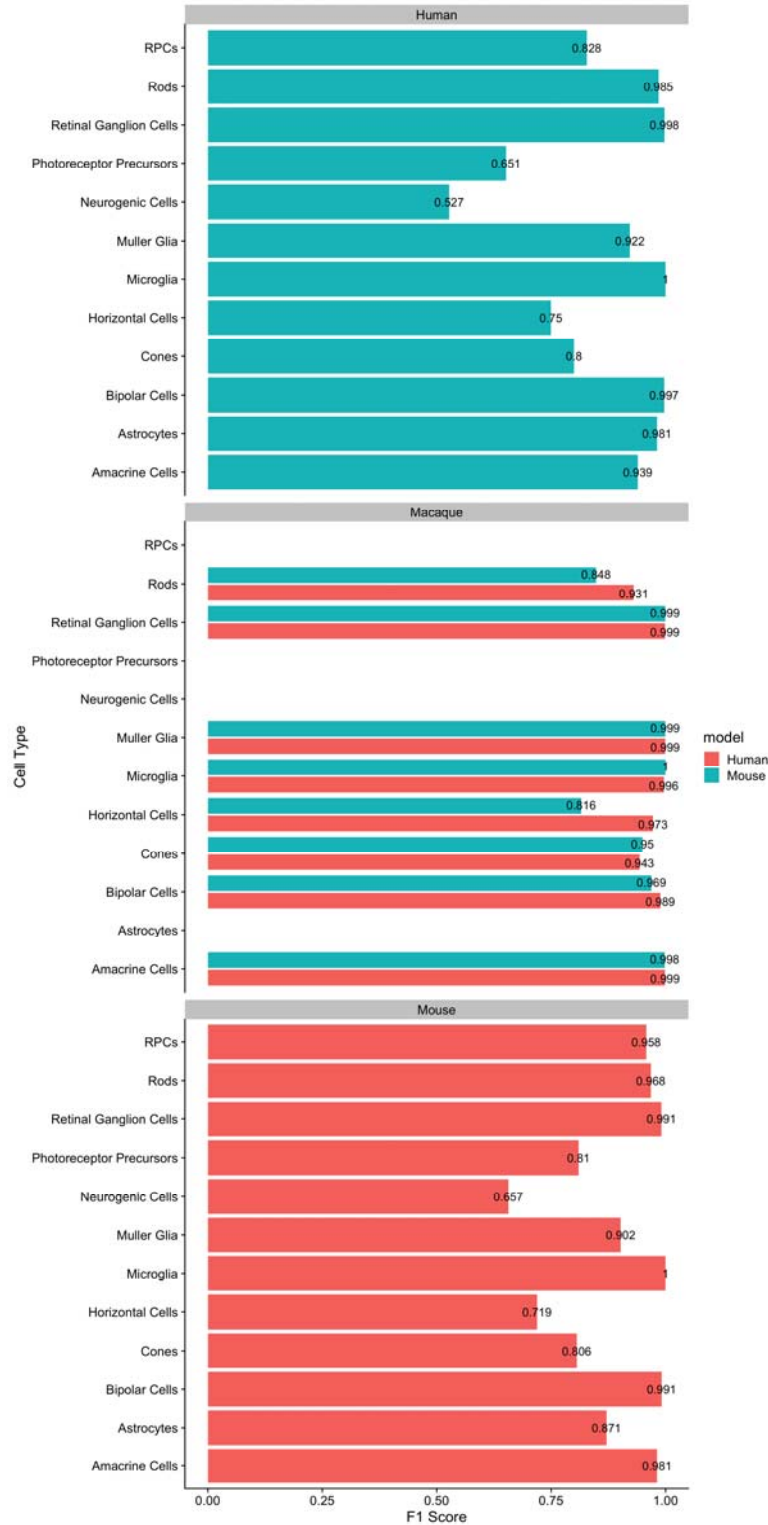

467

468 *Supplemental Figure 6: F1 scores (1 is perfect) of cell type prediction when using a human or mouse based xgboost*  
 469 *cell type prediction model on other organisms (human, macaque, mouse).*

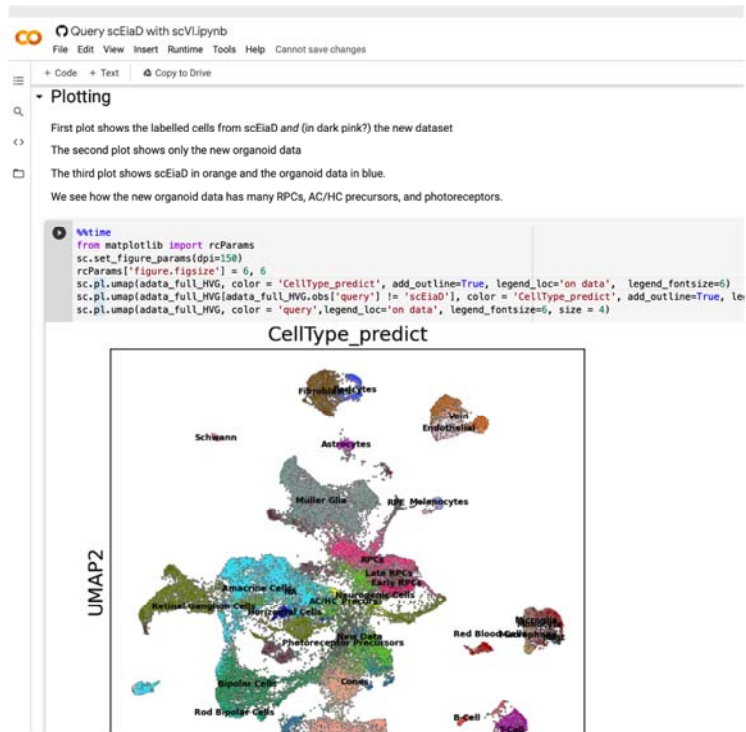

470

471 *Supplemental Figure 7: Screen shot of Google colab notebook that demonstrates how to integrate external data into*  
472 *the scEiaD resource. We see in the screenshot how the organoid dataset contains many of the retinal cell types.*

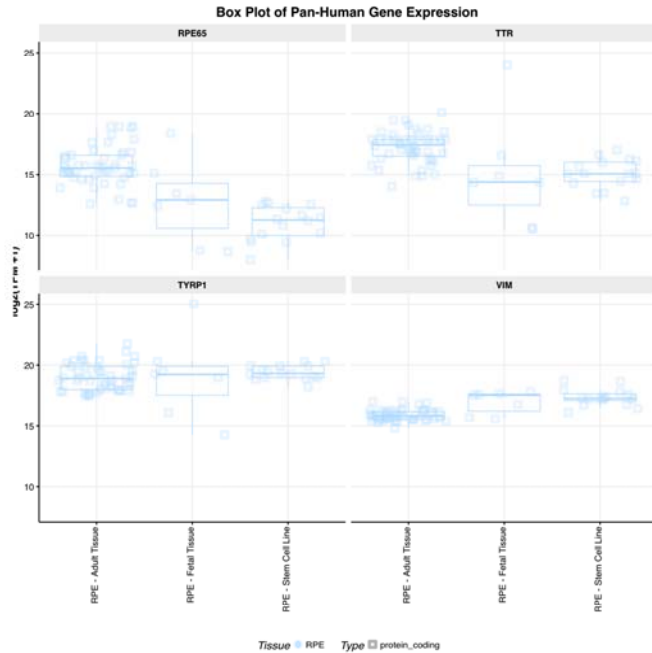

473

474 *Supplemental Figure 8: Screenshot of eyeIntegration bulk RNA-seq meta-analysis of vimentin expression in different*  
475 *RPE tissue sources*

## 476 Works Cited

477 1. Masland RH. The Neuronal Organization of the Retina. *Neuron*. 2012;76(2):266-280.

478 doi:[10.1016/j.neuron.2012.10.002](https://doi.org/10.1016/j.neuron.2012.10.002)

479 2. Annies M, Kröger S. Isoform Pattern and AChR Aggregation Activity of Agrin Expressed by Embryonic Chick  
480 Retinal Ganglion Neurons. *Molecular and Cellular Neuroscience*. 2002;20(3):525-535.

481 doi:[10.1006/mcne.2002.1125](https://doi.org/10.1006/mcne.2002.1125)

482 3. Hagstrom SA, Neitz M, Neitz J. Cone pigment gene expression in individual photoreceptors and the chromatic  
483 topography of the retina. *J Opt Soc Am A Opt Image Sci Vis*. 2000;17(3):527-537. doi:[10.1364/josaa.17.000527](https://doi.org/10.1364/josaa.17.000527)

484 4. Trimarchi JM, Stadler MB, Roska B, et al. Molecular heterogeneity of developing retinal ganglion and amacrine  
485 cells revealed through single cell gene expression profiling. *Journal of Comparative Neurology*. 2007;502(6):1047-

486 1065. doi:[10.1002/cne.21368](https://doi.org/10.1002/cne.21368)

- 487 5. Wahlin KJ, Lim L, Grice EA, Campochiaro PA, Zack DJ, Adler R. A method for analysis of gene expression in  
488 isolated mouse photoreceptor and Müller cells. *Mol Vis*. 2004;10:366-375.
- 489 6. Svensson V, da Veiga Beltrame E, Pachter L. A curated database reveals trends in single-cell transcriptomics.  
490 *Database*. 2020;2020(baaa073). doi:[10.1093/database/baaa073](https://doi.org/10.1093/database/baaa073)
- 491 7. Macosko EZ, Basu A, Satija R, et al. Highly Parallel Genome-wide Expression Profiling of Individual Cells  
492 Using Nanoliter Droplets. *Cell*. 2015;161(5):1202-1214. doi:[10.1016/j.cell.2015.05.002](https://doi.org/10.1016/j.cell.2015.05.002)
- 493 8. Buenaventura DF, Corseri A, Emerson MM. Identification of Genes With Enriched Expression in Early  
494 Developing Mouse Cone Photoreceptors. *Invest Ophthalmol Vis Sci*. 2019;60(8):2787-2799. doi:[10.1167/iovs.19-](https://doi.org/10.1167/iovs.19-26951)  
495 [26951](https://doi.org/10.1167/iovs.19-26951)
- 496 9. Clark BS, Stein-O'Brien GL, Shiau F, et al. Single-Cell RNA-Seq Analysis of Retinal Development Identifies  
497 NFI Factors as Regulating Mitotic Exit and Late-Born Cell Specification. *Neuron*. Published online May 22, 2019.  
498 doi:[10.1016/j.neuron.2019.04.010](https://doi.org/10.1016/j.neuron.2019.04.010)
- 499 10. Cowan CS, Renner M, De Gennaro M, et al. Cell Types of the Human Retina and Its Organoids at Single-Cell  
500 Resolution. *Cell*. 2020;182(6):1623-1640.e34. doi:[10.1016/j.cell.2020.08.013](https://doi.org/10.1016/j.cell.2020.08.013)
- 501 11. Dharmat R, Kim S, Liu H, Fu S, Li Y, Chen R. Epigenetic adaptation prolongs photoreceptor survival during  
502 retinal degeneration. *bioRxiv*. Published online September 18, 2019:774950. doi:[10.1101/774950](https://doi.org/10.1101/774950)
- 503 12. Fadl BR, Brodie SA, Malasky M, et al. An optimized protocol for retina single-cell RNA sequencing. *Mol Vis*.  
504 2020;26:705-717. Accessed March 26, 2021. <https://www.ncbi.nlm.nih.gov/pmc/articles/PMC7553720/>
- 505 13. Hu Y, Wang X, Hu B, et al. Dissecting the transcriptome landscape of the human fetal neural retina and retinal  
506 pigment epithelium by single-cell RNA-seq analysis. *PLoS Biol*. 2019;17(7):e3000365.  
507 doi:[10.1371/journal.pbio.3000365](https://doi.org/10.1371/journal.pbio.3000365)
- 508 14. Lehmann GL, Hanke-Gogokhia C, Hu Y, et al. Single-cell profiling reveals an endothelium-mediated  
509 immunomodulatory pathway in the eye choroid. *Journal of Experimental Medicine*. 2020;217(e20190730).  
510 doi:[10.1084/jem.20190730](https://doi.org/10.1084/jem.20190730)

- 511 15. Lo Giudice Q, Leleu M, La Manno G, Fabre PJ. Single-cell transcriptional logic of cell-fate specification and  
512 axon guidance in early-born retinal neurons. *Development*. 2019;146(17). doi:[10.1242/dev.178103](https://doi.org/10.1242/dev.178103)
- 513 16. Lukowski SW, Lo CY, Sharov AA, et al. A single-cell transcriptome atlas of the adult human retina. *EMBO J*.  
514 2019;38(18):e100811. doi:[10.15252/emj.2018100811](https://doi.org/10.15252/emj.2018100811)
- 515 17. Lu Y, Shiao F, Yi W, et al. Single-Cell Analysis of Human Retina Identifies Evolutionarily Conserved and  
516 Species-Specific Mechanisms Controlling Development. *Dev Cell*. 2020;53(4):473-491.e9.  
517 doi:[10.1016/j.devcel.2020.04.009](https://doi.org/10.1016/j.devcel.2020.04.009)
- 518 18. Menon M, Mohammadi S, Davila-Velderrain J, et al. Single-cell transcriptomic atlas of the human retina  
519 identifies cell types associated with age-related macular degeneration. *Nat Commun*. 2019;10(1):4902.  
520 doi:[10.1038/s41467-019-12780-8](https://doi.org/10.1038/s41467-019-12780-8)
- 521 19. O’Koren EG, Yu C, Klingeborn M, et al. Microglial Function Is Distinct in Different Anatomical Locations  
522 during Retinal Homeostasis and Degeneration. *Immunity*. 2019;50(3):723-737.e7.  
523 doi:[10.1016/j.immuni.2019.02.007](https://doi.org/10.1016/j.immuni.2019.02.007)
- 524 20. Peng Y-R, Shekhar K, Yan W, et al. Molecular Classification and Comparative Taxonomics of Foveal and  
525 Peripheral Cells in Primate Retina. *Cell*. 2019;176(5):1222-1237.e22. doi:[10.1016/j.cell.2019.01.004](https://doi.org/10.1016/j.cell.2019.01.004)
- 526 21. Shekhar K, Lapan SW, Whitney IE, et al. Comprehensive Classification of Retinal Bipolar Neurons by Single-  
527 Cell Transcriptomics. *Cell*. 2016;166(5):1308-1323.e30. doi:[10.1016/j.cell.2016.07.054](https://doi.org/10.1016/j.cell.2016.07.054)
- 528 22. Sridhar A, Hoshino A, Finkbeiner CR, et al. Single-Cell Transcriptomic Comparison of Human Fetal Retina,  
529 hPSC-Derived Retinal Organoids, and Long-Term Retinal Cultures. *Cell Rep*. 2020;30(5):1644-1659.e4.  
530 doi:[10.1016/j.celrep.2020.01.007](https://doi.org/10.1016/j.celrep.2020.01.007)
- 531 23. Tran NM, Shekhar K, Whitney IE, et al. Single-Cell Profiles of Retinal Ganglion Cells Differing in Resilience to  
532 Injury Reveal Neuroprotective Genes. *Neuron*. 2019;104(6):1039-1055.e12. doi:[10.1016/j.neuron.2019.11.006](https://doi.org/10.1016/j.neuron.2019.11.006)



- 533 24. Voigt AP, Whitmore SS, Mulfaul K, et al. Bulk and single-cell gene expression analyses reveal aging human  
534 choriocapillaris has pro-inflammatory phenotype. *Microvascular Research*. 2020;131:104031.  
535 doi:[10.1016/j.mvr.2020.104031](https://doi.org/10.1016/j.mvr.2020.104031)
- 536 25. Voigt AP, Whitmore SS, Flamme-Wiese MJ, et al. Molecular characterization of foveal versus peripheral human  
537 retina by single-cell RNA sequencing. *Experimental Eye Research*. 2019;184:234-242.  
538 doi:[10.1016/j.exer.2019.05.001](https://doi.org/10.1016/j.exer.2019.05.001)
- 539 26. Voigt AP, Binkley E, Flamme-Wiese MJ, et al. Single-Cell RNA Sequencing in Human Retinal Degeneration  
540 Reveals Distinct Glial Cell Populations. *Cells*. 2020;9(2). doi:[10.3390/cells9020438](https://doi.org/10.3390/cells9020438)
- 541 27. Voigt AP, Mulfaul K, Mullin NK, et al. Single-cell transcriptomics of the human retinal pigment epithelium and  
542 choroid in health and macular degeneration. *Proc Natl Acad Sci U S A*. 2019;116(48):24100-24107.  
543 doi:[10.1073/pnas.1914143116](https://doi.org/10.1073/pnas.1914143116)
- 544 28. Yan W, Peng Y-R, van Zyl T, et al. Cell Atlas of The Human Fovea and Peripheral Retina. *Sci Rep*.  
545 2020;10(1):9802. doi:[10.1038/s41598-020-66092-9](https://doi.org/10.1038/s41598-020-66092-9)
- 546 29. Yan W, Laboulaye MA, Tran NM, Whitney IE, Benhar I, Sanes JR. Mouse Retinal Cell Atlas: Molecular  
547 Identification of over Sixty Amacrine Cell Types. *J Neurosci*. 2020;40(27):5177-5195.  
548 doi:[10.1523/JNEUROSCI.0471-20.2020](https://doi.org/10.1523/JNEUROSCI.0471-20.2020)
- 549 30. Melsted P, Boeshaghi AS, Gao F, et al. Modular and efficient pre-processing of single-cell RNA-seq. *bioRxiv*.  
550 Published online July 26, 2019:673285. doi:[10.1101/673285](https://doi.org/10.1101/673285)
- 551 31. Srivastava A, Malik L, Smith T, Sudbery I, Patro R. Alevin efficiently estimates accurate gene abundances from  
552 dscRNA-seq data. *Genome Biology*. 2019;20(1):65. doi:[10.1186/s13059-019-1670-y](https://doi.org/10.1186/s13059-019-1670-y)
- 553 32. Butler A, Hoffman P, Smibert P, Papalexi E, Satija R. Integrating single-cell transcriptomic data across different  
554 conditions, technologies, and species. *Nature Biotechnology*. 2018;36(5, 5):411-420. doi:[10.1038/nbt.4096](https://doi.org/10.1038/nbt.4096)

- 555 33. Haghverdi L, Lun ATL, Morgan MD, Marioni JC. Batch effects in single-cell RNA-sequencing data are  
556 corrected by matching mutual nearest neighbors. *Nature Biotechnology*. 2018;36(5, 5):421-427.  
557 doi:[10.1038/nbt.4091](https://doi.org/10.1038/nbt.4091)
- 558 34. Hie B, Bryson B, Berger B. Efficient integration of heterogeneous single-cell transcriptomes using Scanorama.  
559 *Nature Biotechnology*. 2019;37(6, 6):685-691. doi:[10.1038/s41587-019-0113-3](https://doi.org/10.1038/s41587-019-0113-3)
- 560 35. Johnson WE, Li C, Rabinovic A. Adjusting batch effects in microarray expression data using empirical Bayes  
561 methods. *Biostatistics*. 2007;8(1):118-127. doi:[10.1093/biostatistics/kxj037](https://doi.org/10.1093/biostatistics/kxj037)
- 562 36. Korsunsky I, Millard N, Fan J, et al. Fast, sensitive and accurate integration of single-cell data with Harmony.  
563 *Nature Methods*. 2019;16(12, 12):1289-1296. doi:[10.1038/s41592-019-0619-0](https://doi.org/10.1038/s41592-019-0619-0)
- 564 37. Liu J, Gao C, Sodicoff J, Kozareva V, Macosko EZ, Welch JD. Jointly defining cell types from multiple single-  
565 cell datasets using LIGER. *Nature Protocols*. 2020;15(11, 11):3632-3662. doi:[10.1038/s41596-020-0391-8](https://doi.org/10.1038/s41596-020-0391-8)
- 566 38. Lopez R, Regier J, Cole MB, Jordan MI, Yosef N. Deep generative modeling for single-cell transcriptomics.  
567 *Nature Methods*. 2018;15(12, 12):1053-1058. doi:[10.1038/s41592-018-0229-2](https://doi.org/10.1038/s41592-018-0229-2)
- 568 39. Polański K, Young MD, Miao Z, Meyer KB, Teichmann SA, Park J-E. BBKNN: Fast batch alignment of single  
569 cell transcriptomes. *Bioinformatics*. 2020;36(3):964-965. doi:[10.1093/bioinformatics/btz625](https://doi.org/10.1093/bioinformatics/btz625)
- 570 40. Query to reference single-cell integration with transfer learning | bioRxiv. Accessed December 20, 2020.  
571 <https://www.biorxiv.org/content/10.1101/2020.07.16.205997v1>
- 572 41. Simon LM, Wang Y-Y, Zhao Z. INSCT: Integrating millions of single cells using batch-aware triplet neural  
573 networks. *bioRxiv*. Published online May 17, 2020:2020.05.16.100024. doi:[10.1101/2020.05.16.100024](https://doi.org/10.1101/2020.05.16.100024)
- 574 42. Stuart T, Butler A, Hoffman P, et al. Comprehensive Integration of Single-Cell Data. *Cell*. 2019;177(7):1888-  
575 1902.e21. doi:[10.1016/j.cell.2019.05.031](https://doi.org/10.1016/j.cell.2019.05.031)
- 576 43. van Dijk D, Sharma R, Nainys J, et al. Recovering Gene Interactions from Single-Cell Data Using Data  
577 Diffusion. *Cell*. 2018;174(3):716-729.e27. doi:[10.1016/j.cell.2018.05.061](https://doi.org/10.1016/j.cell.2018.05.061)

- 578 44. Kallman A, Capowski EE, Wang J, et al. Investigating cone photoreceptor development using patient-derived  
579 NRL null retinal organoids. *Commun Biol.* 2020;3(1):82. doi:[10.1038/s42003-020-0808-5](https://doi.org/10.1038/s42003-020-0808-5)
- 580 45. Hunt RC, Davis AA. Altered expression of keratin and vimentin in human retinal pigment epithelial cells in vivo  
581 and in vitro. *J Cell Physiol.* 1990;145(2):187-199. doi:[10.1002/jcp.1041450202](https://doi.org/10.1002/jcp.1041450202)
- 582 46. Swamy V, McGaughey D. Eye in a Disk: eyeIntegration Human Pan-Eye and Body Transcriptome Database  
583 Version 1.0. *Invest Ophthalmol Vis Sci.* 2019;60(8):3236-3246. doi:[10.1167/iovs.19-27106](https://doi.org/10.1167/iovs.19-27106)
- 584 47. Köster J, Rahmann S. Snakemake—a scalable bioinformatics workflow engine. *Bioinformatics.*  
585 2012;28(19):2520-2522. doi:[10.1093/bioinformatics/bts480](https://doi.org/10.1093/bioinformatics/bts480)
- 586 48. Harrow J, Frankish A, Gonzalez JM, et al. GENCODE: The reference human genome annotation for The  
587 ENCODE Project. *Genome Res.* 2012;22(9):1760-1774. doi:[10.1101/gr.135350.111](https://doi.org/10.1101/gr.135350.111)
- 588 49. J H, A F, Jm G, et al. GENCODE: The reference human genome annotation for The ENCODE Project. *Genome*  
589 *Res.* 2012;22(9):1760-1774. doi:[10.1101/gr.135350.111](https://doi.org/10.1101/gr.135350.111)
- 590 50. Yates AD, Achuthan P, Akanni W, et al. Ensembl 2020. *Nucleic Acids Research.* 2020;48(D1):D682-D688.  
591 doi:[10.1093/nar/gkz966](https://doi.org/10.1093/nar/gkz966)
- 592 51. Bray NL, Pimentel H, Melsted P, Pachter L. Near-optimal probabilistic RNA-seq quantification. *Nat Biotechnol.*  
593 2016;34(5):525-527. doi:[10.1038/nbt.3519](https://doi.org/10.1038/nbt.3519)
- 594 52. Melsted P, Ntranos V, Pachter L. The barcode, UMI, set format and BUStools. *Bioinformatics.*  
595 2019;35(21):4472-4473. doi:[10.1093/bioinformatics/btz279](https://doi.org/10.1093/bioinformatics/btz279)
- 596 53. Lun ATL, Riesenfeld S, Andrews T, et al. EmptyDrops: Distinguishing cells from empty droplets in droplet-  
597 based single-cell RNA sequencing data. *Genome Biology.* 2019;20(1):63. doi:[10.1186/s13059-019-1662-y](https://doi.org/10.1186/s13059-019-1662-y)
- 598 54. Lun ATL, McCarthy DJ, Marioni JC. A step-by-step workflow for low-level analysis of single-cell RNA-seq  
599 data with Bioconductor. *F1000Res.* 2016;5:2122. doi:[10.12688/f1000research.9501.2](https://doi.org/10.12688/f1000research.9501.2)

- 600 55. Blondel VD, Guillaume J-L, Lambiotte R, Lefebvre E. Fast unfolding of communities in large networks. *J Stat*  
601 *Mech.* 2008;2008(10):P10008. doi:[10.1088/1742-5468/2008/10/P10008](https://doi.org/10.1088/1742-5468/2008/10/P10008)
- 602 56. Traag V, Waltman L, van Eck NJ. From Louvain to Leiden: Guaranteeing well-connected communities. *Sci Rep.*  
603 2019;9(1):5233. doi:[10.1038/s41598-019-41695-z](https://doi.org/10.1038/s41598-019-41695-z)
- 604 57. Stassen SV, Siu DMD, Lee KCM, Ho JWK, So HKH, Tsia KK. PARC: Ultrafast and accurate clustering of  
605 phenotypic data of millions of single cells. *Bioinformatics.* 2020;36(9):2778-2786.  
606 doi:[10.1093/bioinformatics/btaa042](https://doi.org/10.1093/bioinformatics/btaa042)
- 607 58. McInnes L, Healy J, Melville J. UMAP: Uniform Manifold Approximation and Projection for Dimension  
608 Reduction. Published September 17, 2020. Accessed December 21, 2020. <http://arxiv.org/abs/1802.03426>
- 609 59. Büttner M, Miao Z, Wolf FA, Teichmann SA, Theis FJ. A test metric for assessing single-cell RNA-seq batch  
610 correction. *Nature Methods.* 2019;16(1, 1):43-49. doi:[10.1038/s41592-018-0254-1](https://doi.org/10.1038/s41592-018-0254-1)
- 611 60. Gayoso A, Shor J. *JonathanShor/DoubletDetection: Doubletdetection V3.0.* Zenodo; 2020.  
612 doi:[10.5281/zenodo.4359992](https://doi.org/10.5281/zenodo.4359992)
- 613 61. Wolock SL, Lopez R, Klein AM. Scrublet: Computational Identification of Cell Doublets in Single-Cell  
614 Transcriptomic Data. *Cell Systems.* 2019;8(4):281-291.e9. doi:[10.1016/j.cels.2018.11.005](https://doi.org/10.1016/j.cels.2018.11.005)
- 615 62. Bergen V, Lange M, Peidli S, Wolf FA, Theis FJ. Generalizing RNA velocity to transient cell states through  
616 dynamical modeling. *Nature Biotechnology.* 2020;38(12, 12):1408-1414. doi:[10.1038/s41587-020-0591-3](https://doi.org/10.1038/s41587-020-0591-3)

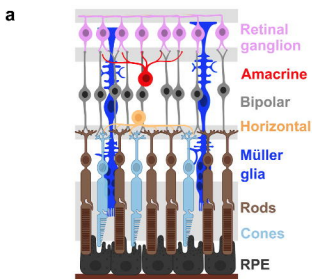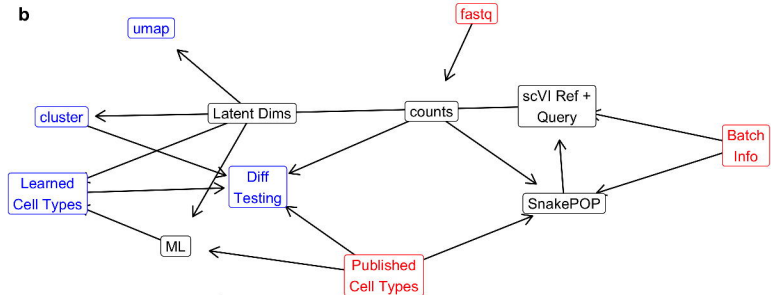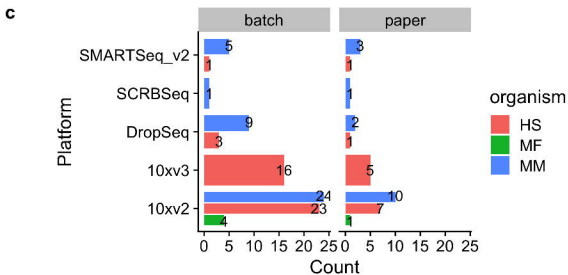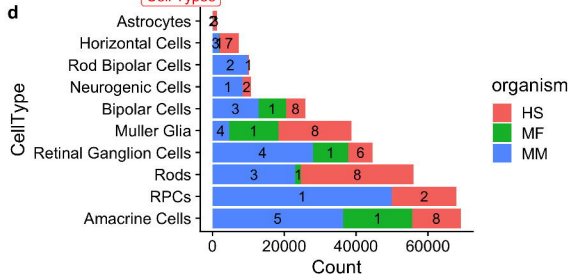

**a**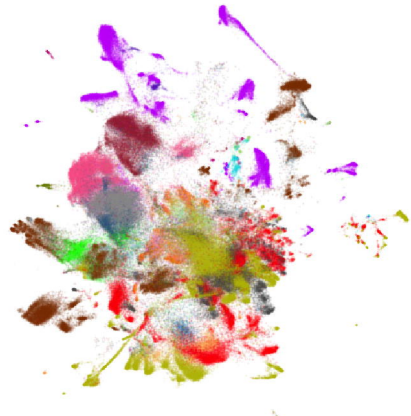**b**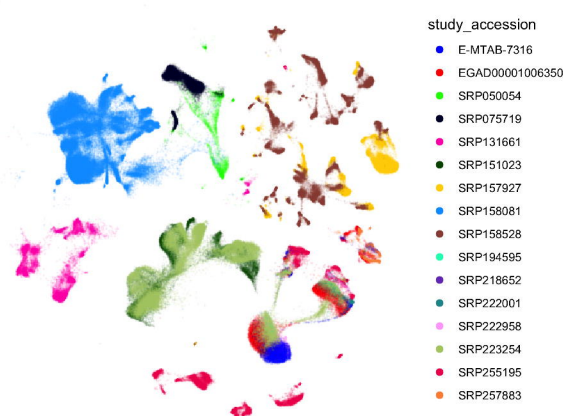**c**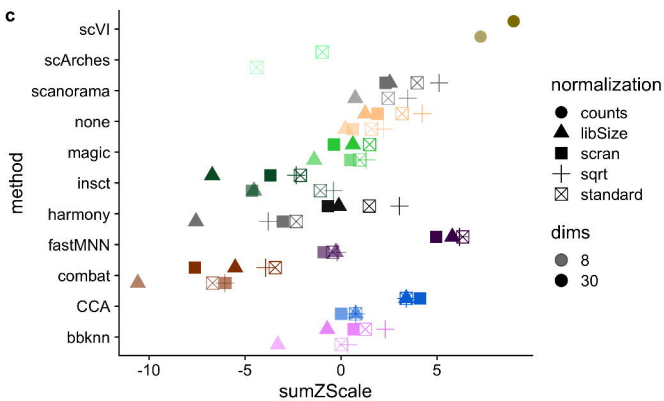**d**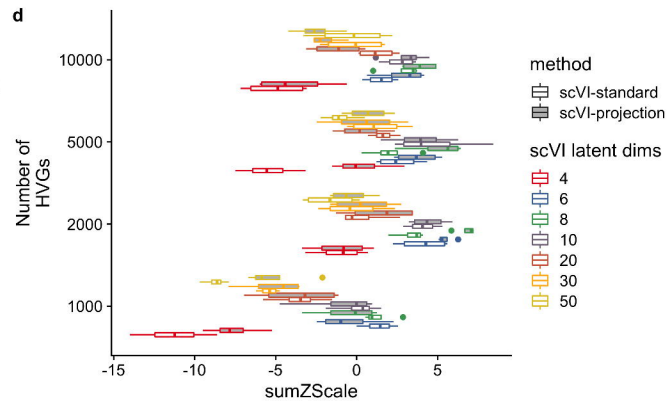

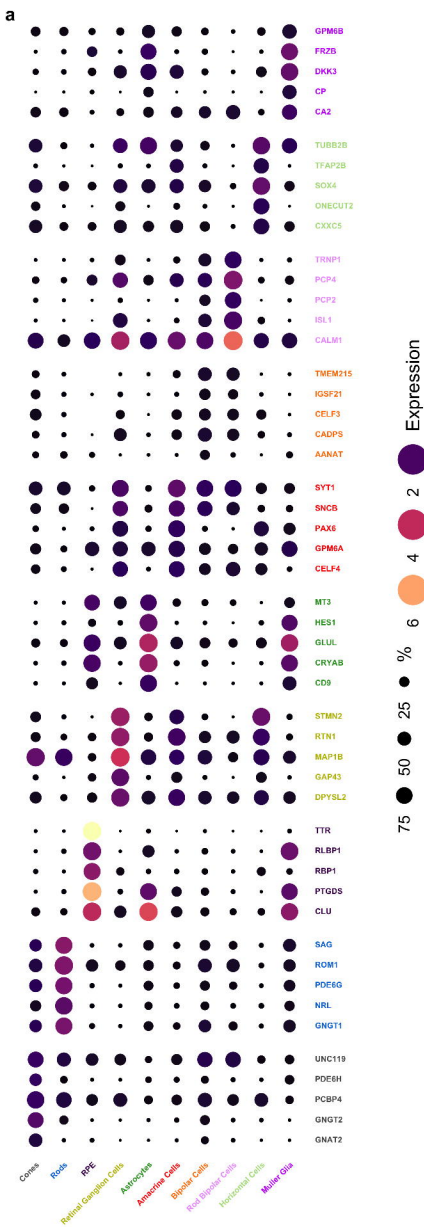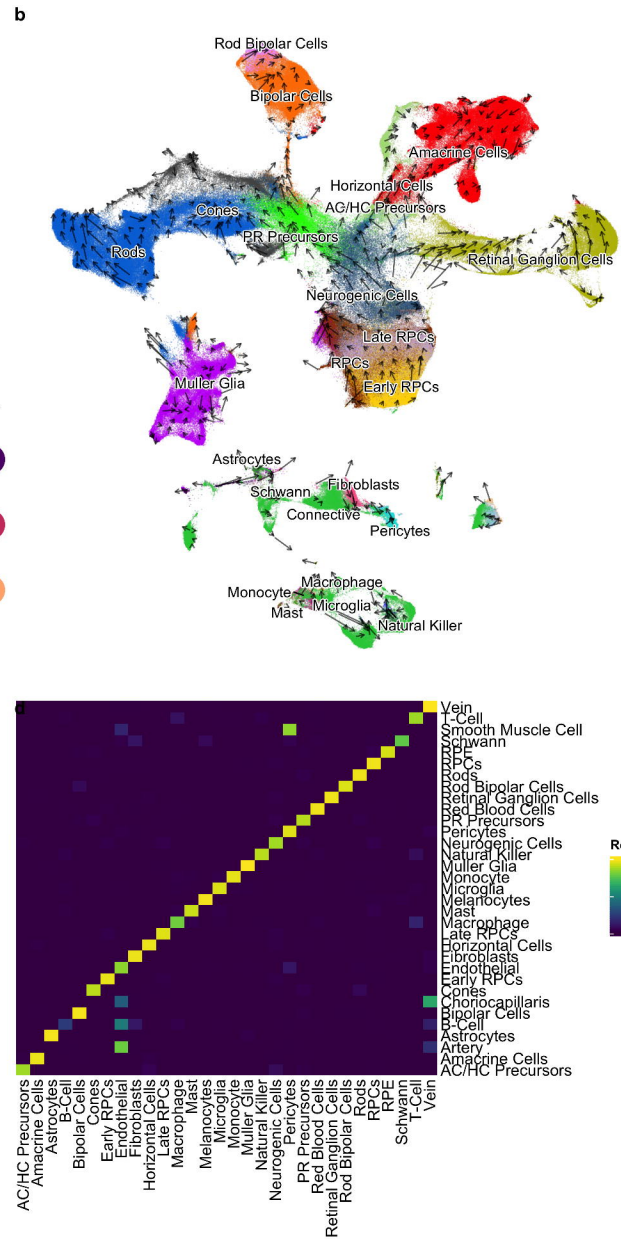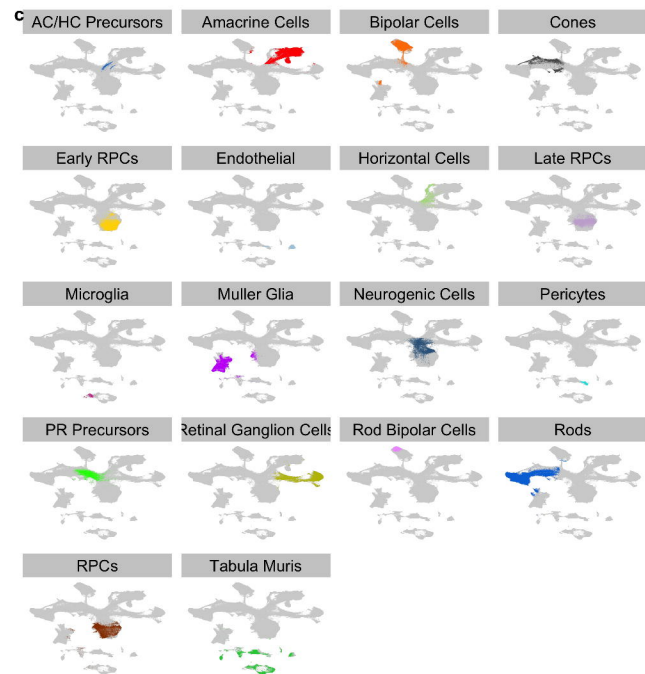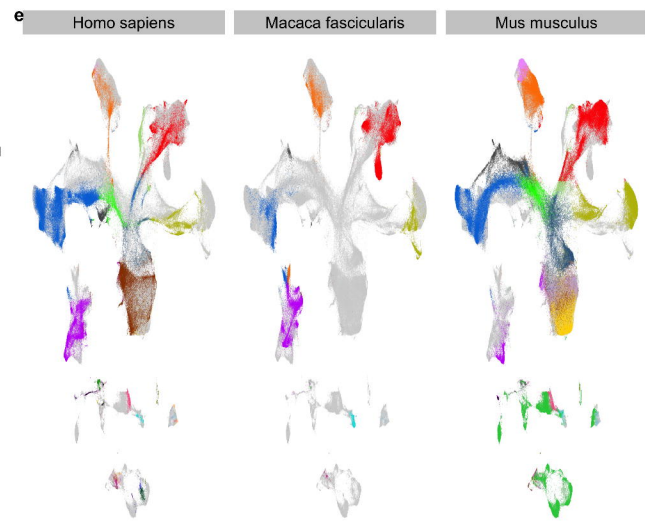



**a**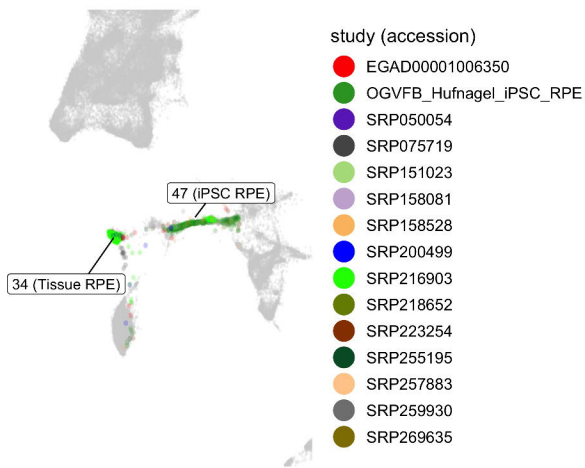**b**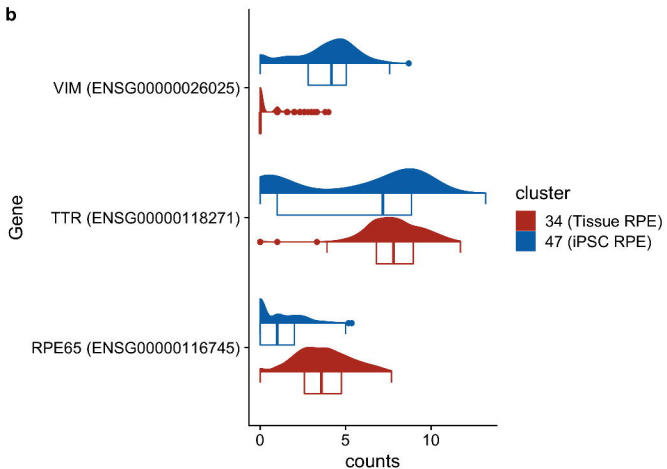

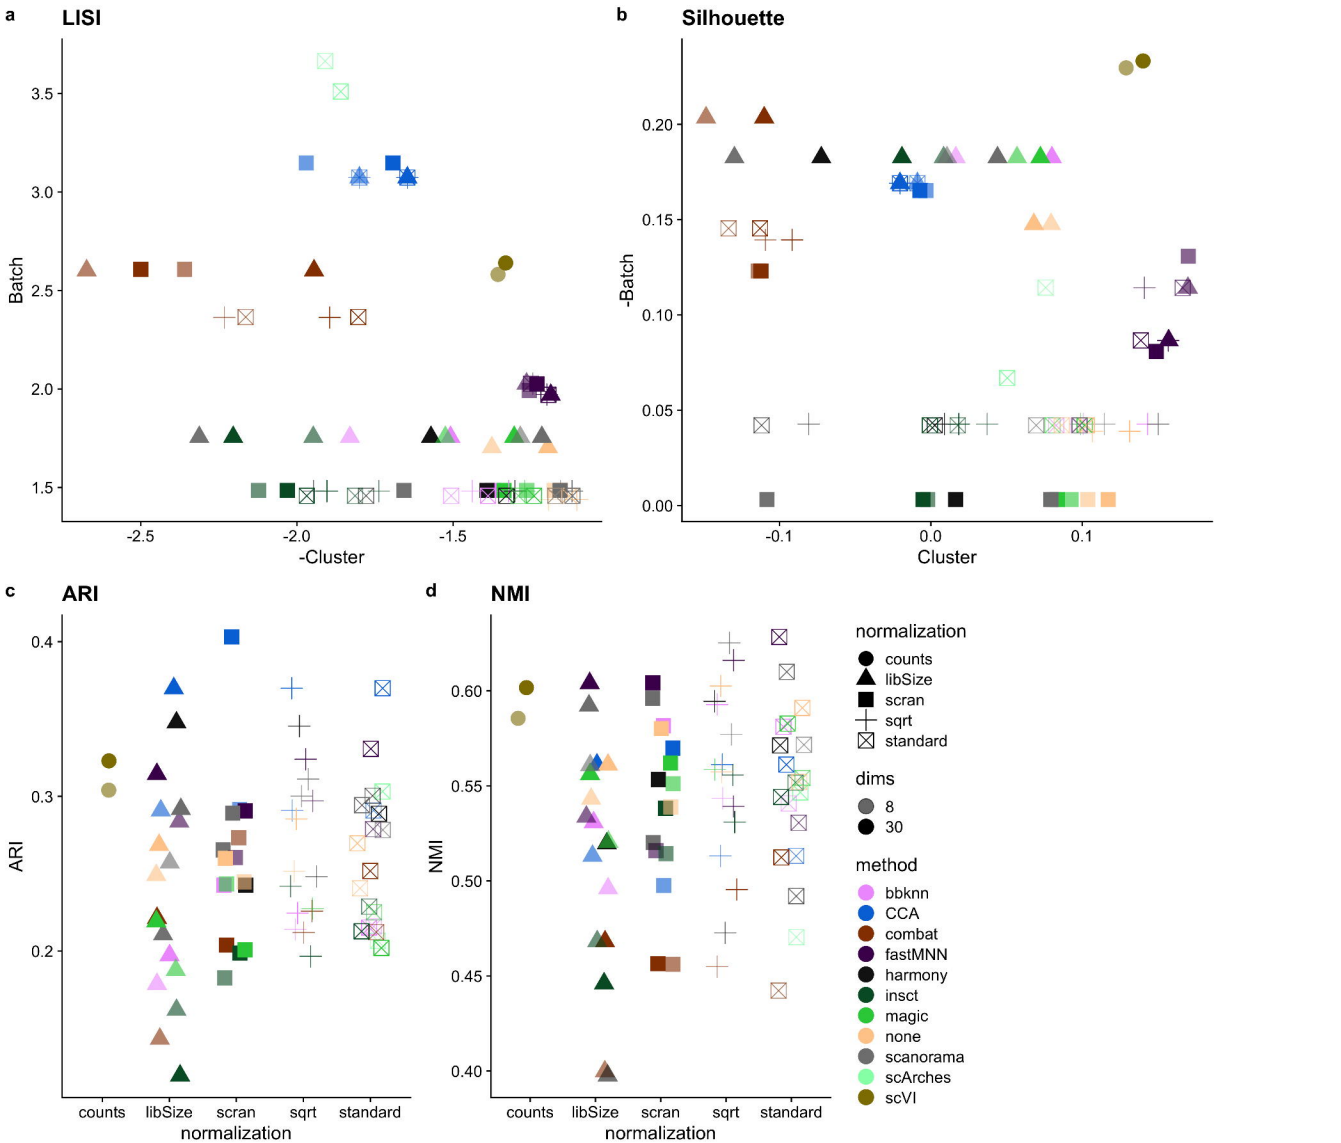

10xv2

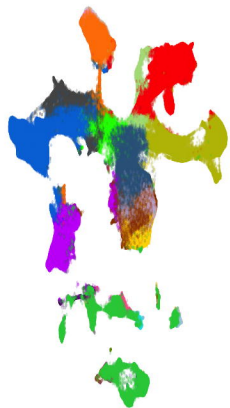

10xv3

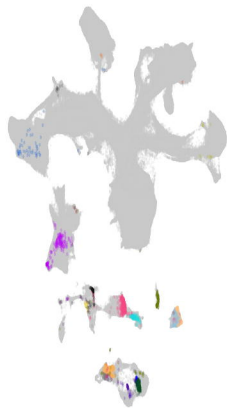

DropSeq

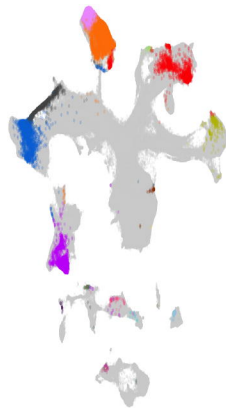

SCRBSeq

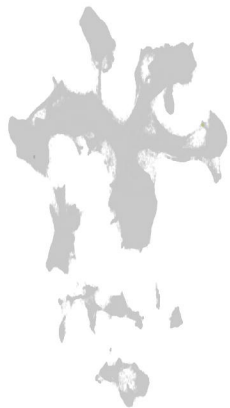

SMARTSeq\_v2

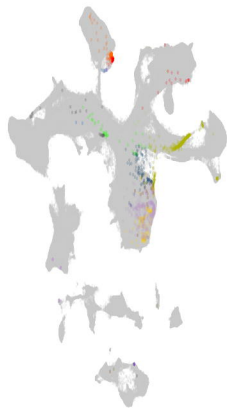

CellType (predict)

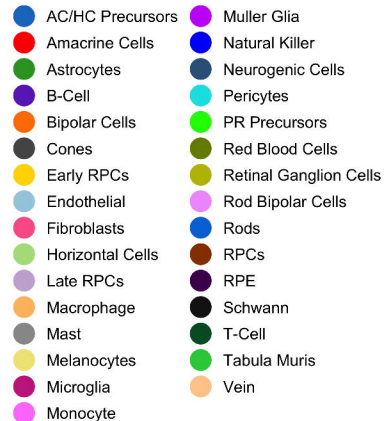

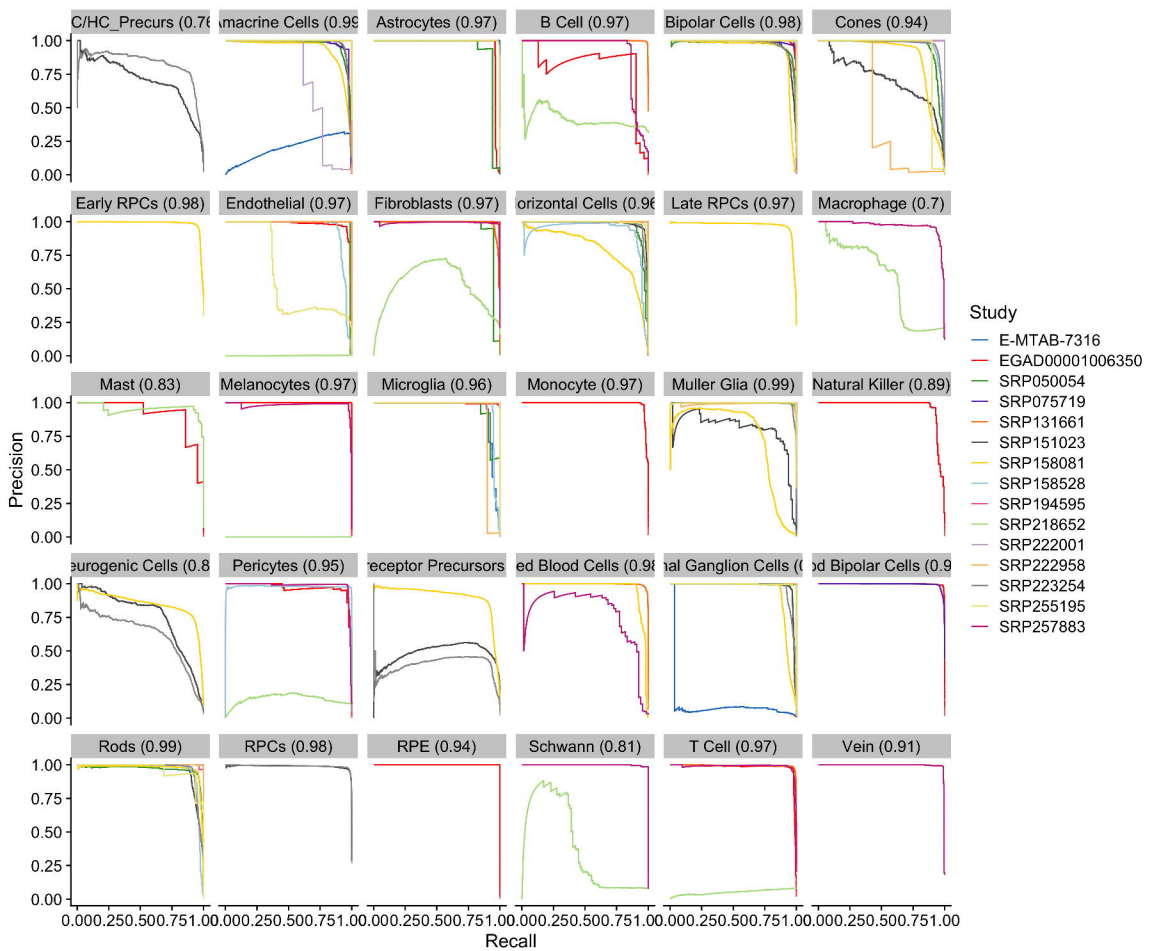

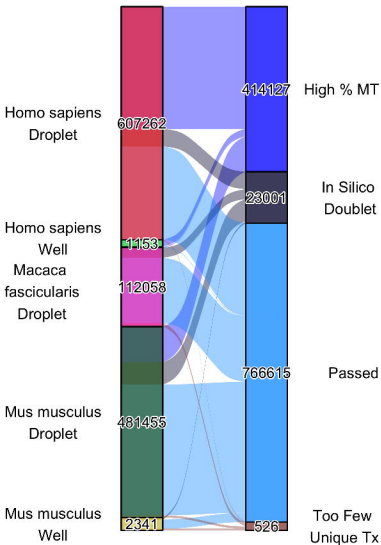

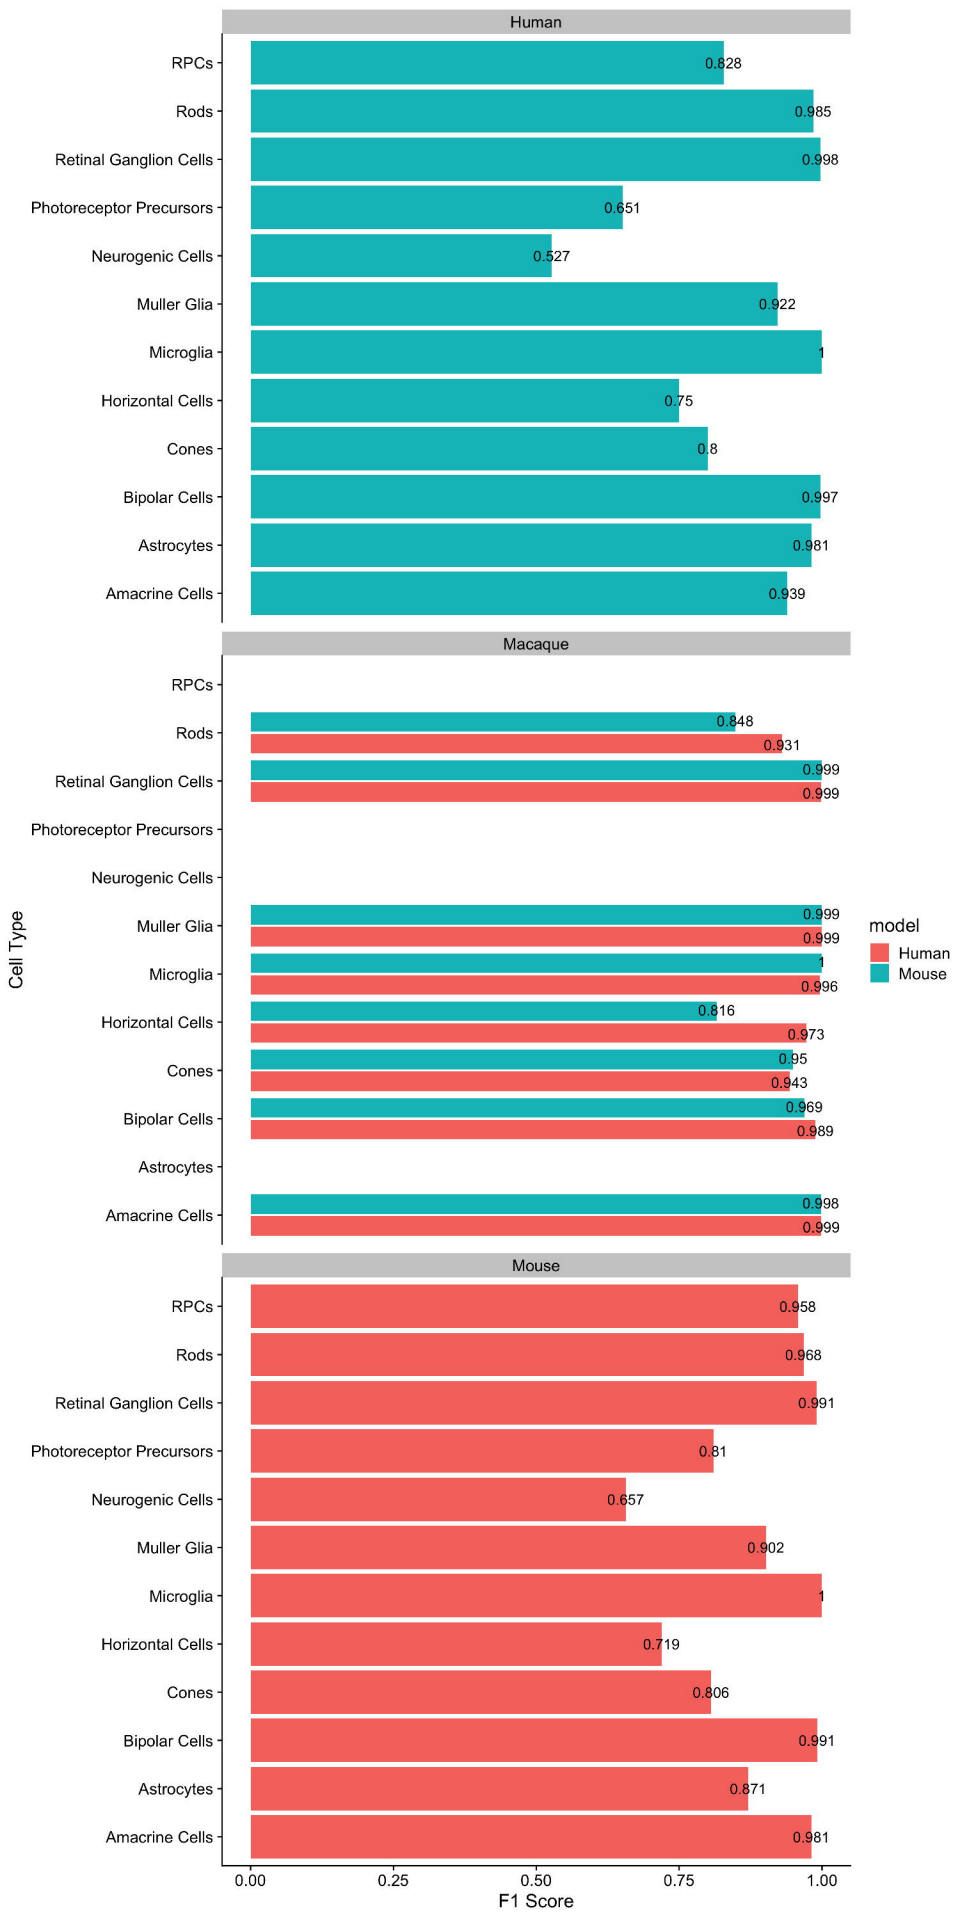

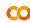

Query scEiaD with scVI.ipynb

File Edit View Insert Runtime Tools Help Cannot save changes

+ Code + Text Copy to Drive

## Plotting

First plot shows the labelled cells from scEiaD *and* (in dark pink?) the new dataset

The second plot shows only the new organoid data

The third plot shows scEiaD in orange and the organoid data in blue.

We see how the new organoid data has many RPCs, AC/HC precursors, and photoreceptors.

```
!time
from matplotlib import rcParams
sc.set_figure_params(dpi=150)
rcParams['figure.figsize'] = 5, 6
sc.pl.umap(adata_full_HVG, color = 'CellType_predict', add_outline=True, legend_loc='on data', legend_fontsize=6)
sc.pl.umap(adata_full_HVG[adata_full_HVG.obs['query'] != 'scEiaD'], color = 'CellType_predict', add_outline=True, legend_loc='on data', legend_fontsize=6, size = 4)
```

### CellType\_predict

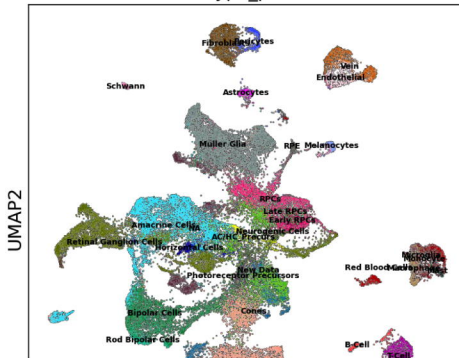



↑ RP-type assignments

**a**

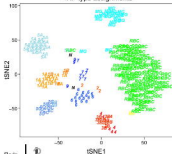

**b**

CellType\_predist

Rods  
 Retinal Ganglion Cells  
 Muller Glia  
 Cones  
 Bipolar Cells  
 B-Cell  
 Amacrine Cells

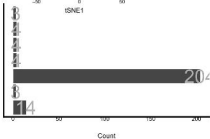

# Box Plot of Pan-Human Gene Expression

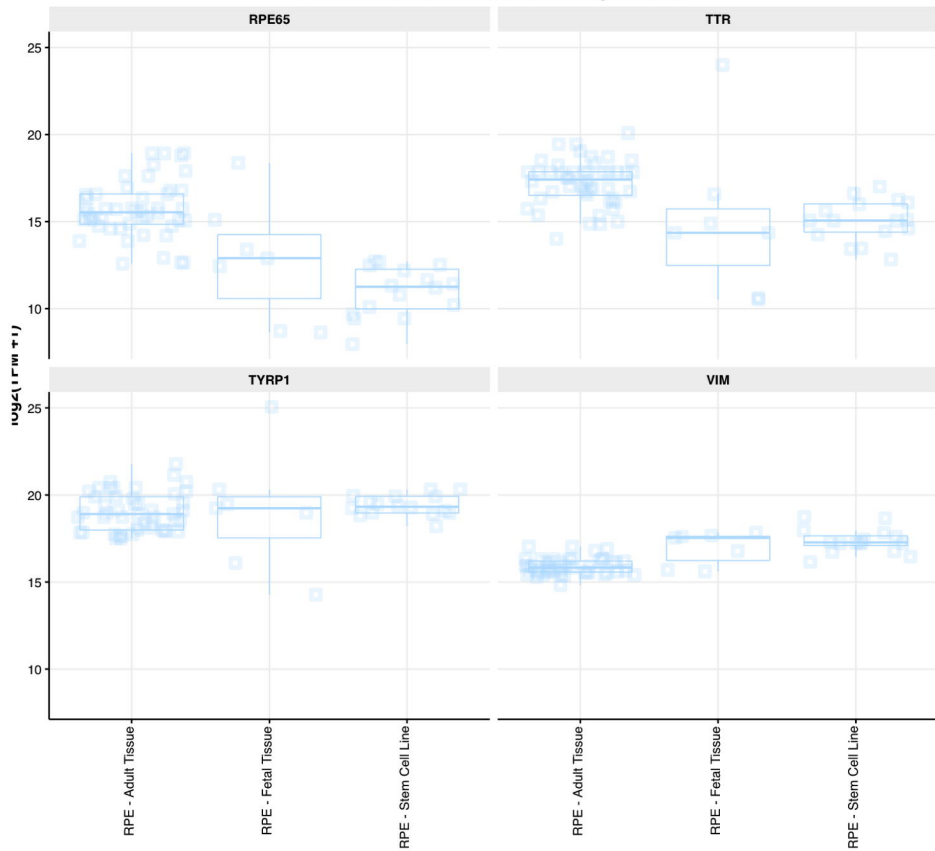

Tissue ● RPE ■ protein\_coding
